# Supplementary material for: Proteomic and Bioinformatic Studies for the Characterization of Response to Pemetrexed in Platinum Drug Resistant Ovarian Cancer
Source: Front Pharmacol. 2018 May 8;9:454. doi: 10.3389/fphar.2018.00454 (PMC5952181; doi:10.3389/fphar.2018.00454)
Supplement: Table S3 — DEPs from MS study. In “peptide” column, values in brackets refer to unique peptides. [file Table_3.XLSX]

## Sheet: Sheet1-sf-solo-dep
						Average Normalised Abundances
Accession	Peptides	Score	Anova (p)* (pval)	Fold	Description	Cond1 701 CR	Cond2 669 PR	Cond3 650 NR	701/650 CR/NR	669/650 PR/NR	maximal modulation (maxmod)	LOG10(maxmod)	-LOG10(pval)
1433B_HUMAN	12 (7)	744.8	2.08e-05	8.53	14-3-3 protein beta/alpha OS=Homo sapiens GN=YWHAB PE=1 SV=3	48600000	148000000	17300000	2.80925	8.55491	8.55491	0.932216	4.68194
1433F_HUMAN	12 (8)	534.73	0.00196	2.53	14-3-3 protein eta OS=Homo sapiens GN=YWHAH PE=1 SV=4	49500000	84300000	33300000	1.48649	2.53153	2.53153	0.403383	2.70774
1433G_HUMAN	10 (5)	503.62	3.32e-05	3.2	14-3-3 protein gamma OS=Homo sapiens GN=YWHAG PE=1 SV=2	19200000	44500000	13900000	1.38129	3.20144	3.20144	0.505345	4.47886
1433S_HUMAN	7 (3)	265.66	1.41e-06	19.55	14-3-3 protein sigma OS=Homo sapiens GN=SFN PE=1 SV=1	3810000	11500000	590000	6.45763	19.4915	19.4915	1.28985	5.85078
1433T_HUMAN	15 (10)	734.85	1.69e-06	6.82	14-3-3 protein theta OS=Homo sapiens GN=YWHAQ PE=1 SV=1	53900000	99100000	14500000	3.71724	6.83448	6.83448	0.834706	5.77211
1433Z_HUMAN	14 (11)	1014.23	6.61e-05	2.33	14-3-3 protein zeta/delta OS=Homo sapiens GN=YWHAZ PE=1 SV=1	189000000	440000000	338000000	0.559172	1.30178	0.559172	-0.252455	4.1798
1A02_HUMAN	11 (2)	517.69	0.000108	4.22	HLA class I histocompatibility antigen, A-2 alpha chain OS=Homo sapiens GN=HLA-A PE=1 SV=1	11900000	9410000	2810000	4.23488	3.34875	4.23488	0.626841	3.96658
1A25_HUMAN	4 (1)	174.95	4.28e-05	41	HLA class I histocompatibility antigen, A-25 alpha chain OS=Homo sapiens GN=HLA-A PE=1 SV=1	36400	1490000	241000	0.151037	6.18257	0.151037	-0.820916	4.36856
1C02_HUMAN	7 (1)	228.24	0.00657	920.49	HLA class I histocompatibility antigen, Cw-2 alpha chain OS=Homo sapiens GN=HLA-C PE=1 SV=1	4580000	3080000	4976.54	920.318	618.904	920.318	2.96394	2.18243
2AAA_HUMAN	12 (6)	485.98	0.00553	1.65	Serine/threonine-protein phosphatase 2A 65 kDa regulatory subunit A alpha isoform OS=Homo sapiens GN=PPP2R1A PE=1 SV=4	14400000	14300000	8730000	1.64948	1.63803	1.64948	0.217348	2.25727
2B17_HUMAN	5 (2)	186.34	3.44e-05	4.01	HLA class II histocompatibility antigen, DRB1-7 beta chain OS=Homo sapiens GN=HLA-DRB1 PE=1 SV=1	1160000	4630000	1160000	1	3.99138	3.99138	0.601123	4.46344
3HIDH_HUMAN	2 (2)	47.66	2.4e-06	22.77	3-hydroxyisobutyrate dehydrogenase, mitochondrial OS=Homo sapiens GN=HIBADH PE=1 SV=2	4940000	1100000	217000	22.765	5.06912	22.765	1.35727	5.61979
4F2_HUMAN	2 (2)	126.28	0.000299	3.79	4F2 cell-surface antigen heavy chain OS=Homo sapiens GN=SLC3A2 PE=1 SV=3	1260000	789000	2990000	0.421405	0.26388	0.26388	-0.578594	3.52433
6PGD_HUMAN	10 (7)	511.84	0.00969	1.82	6-phosphogluconate dehydrogenase, decarboxylating OS=Homo sapiens GN=PGD PE=1 SV=3	32100000	58300000	33200000	0.966867	1.75602	1.75602	0.24453	2.01368
6PGL_HUMAN	4 (4)	112.77	3.05e-06	2.42	6-phosphogluconolactonase OS=Homo sapiens GN=PGLS PE=1 SV=2	14800000	13900000	6090000	2.43021	2.28243	2.43021	0.385644	5.5157
A1AG1_HUMAN	8 (6)	380.57	0.00259	1.8	Alpha-1-acid glycoprotein 1 OS=Homo sapiens GN=ORM1 PE=1 SV=1	53000000	95400000	56400000	0.939716	1.69149	1.69149	0.228269	2.5867
A1AG2_HUMAN	6 (4)	255.22	0.00013	2.78	Alpha-1-acid glycoprotein 2 OS=Homo sapiens GN=ORM2 PE=1 SV=2	19600000	25600000	9220000	2.12581	2.77657	2.77657	0.443509	3.88606
A1BG_HUMAN	6 (3)	249.7	0.01	8.79	Alpha-1B-glycoprotein OS=Homo sapiens GN=A1BG PE=1 SV=4	7180000	16500000	1880000	3.81915	8.7766	8.7766	0.943326	2
A2MG_HUMAN	25 (21)	984.43	1.95e-06	3.97	Alpha-2-macroglobulin OS=Homo sapiens GN=A2M PE=1 SV=3	181000000	87500000	45600000	3.9693	1.91886	3.9693	0.598714	5.70997
AACT_HUMAN	11 (9)	573.69	5.16e-06	2.36	Alpha-1-antichymotrypsin OS=Homo sapiens GN=SERPINA3 PE=1 SV=2	78600000	52700000	124000000	0.633871	0.425	0.425	-0.371611	5.28735
AATM_HUMAN	10 (9)	347.9	1.74e-05	2.89	Aspartate aminotransferase, mitochondrial OS=Homo sapiens GN=GOT2 PE=1 SV=3	46700000	52400000	18100000	2.58011	2.89503	2.89503	0.461653	4.75945
ABCE1_HUMAN	2 (2)	69.34	0.00328	2.36	ATP-binding cassette sub-family E member 1 OS=Homo sapiens GN=ABCE1 PE=1 SV=1	3050000	7220000	3380000	0.902367	2.13609	2.13609	0.32962	2.48413
ABH15_HUMAN	1 (1)	33.55	0.000167	5.14	Abhydrolase domain-containing protein 15 OS=Homo sapiens GN=ABHD15 PE=2 SV=2	584000	624000	3000000	0.194667	0.208	0.194667	-0.710708	3.77728
ABHDA_HUMAN	3 (3)	124.62	0.000828	3.23	Mycophenolic acid acyl-glucuronide esterase, mitochondrial OS=Homo sapiens GN=ABHD10 PE=1 SV=1	3120000	2490000	967000	3.22647	2.57497	3.22647	0.508728	3.08197
ACBP_HUMAN	1 (1)	23.74	3.44e-08	12.76	Acyl-CoA-binding protein OS=Homo sapiens GN=DBI PE=1 SV=2	4720000	13000000	1020000	4.62745	12.7451	12.7451	1.10534	7.46344
ACINU_HUMAN	2 (2)	94.22	0.00123	2.77	Apoptotic chromatin condensation inducer in the nucleus OS=Homo sapiens GN=ACIN1 PE=1 SV=2	3840000	4780000	1730000	2.21965	2.76301	2.76301	0.441382	2.91009
ACON_HUMAN	18 (14)	867.27	0.000338	2.54	Aconitate hydratase, mitochondrial OS=Homo sapiens GN=ACO2 PE=1 SV=2	63700000	76900000	30200000	2.10927	2.54636	2.54636	0.405919	3.47108
ACOT1_HUMAN	2 (2)	58.54	0.00816	25.93	Acyl-coenzyme A thioesterase 1 OS=Homo sapiens GN=ACOT1 PE=1 SV=1	855000	1440000	55500	15.4054	25.9459	25.9459	1.41407	2.08831
ACPH_HUMAN	8 (8)	286.73	1.27e-05	2.62	Acylamino-acid-releasing enzyme OS=Homo sapiens GN=APEH PE=1 SV=4	23900000	23800000	9120000	2.62061	2.60965	2.62061	0.418403	4.8962
ACTB_HUMAN	24 (1)	1748.64	4.38e-07	26.41	Actin, cytoplasmic 1 OS=Homo sapiens GN=ACTB PE=1 SV=1	149000000	308000000	11700000	12.735	26.3248	26.3248	1.42036	6.35853
ACTN1_HUMAN	30 (14)	1434.82	7.33e-08	3.61	Alpha-actinin-1 OS=Homo sapiens GN=ACTN1 PE=1 SV=2	82800000	118000000	32800000	2.52439	3.59756	3.59756	0.556008	7.1349
ACTN4_HUMAN	37 (23)	1645.45	2.83e-06	2.45	Alpha-actinin-4 OS=Homo sapiens GN=ACTN4 PE=1 SV=2	168000000	148000000	68700000	2.44541	2.15429	2.44541	0.388353	5.54821
ACYP2_HUMAN	1 (1)	19.91	0.01	250.23	Acylphosphatase-2 OS=Homo sapiens GN=ACYP2 PE=1 SV=2	533000	359000	2130.24	250.207	168.526	250.207	2.3983	2
ADDA_HUMAN	2 (1)	64.22	0.00186	18.98	Alpha-adducin OS=Homo sapiens GN=ADD1 PE=1 SV=2	1910000	1480000	100000	19.1	14.8	19.1	1.28103	2.73049
ADH1B_HUMAN	5 (2)	153.61	4.4e-06	6.11	Alcohol dehydrogenase 1B OS=Homo sapiens GN=ADH1B PE=1 SV=2	2710000	16600000	3920000	0.691327	4.23469	4.23469	0.626822	5.35655
ADH1G_HUMAN	5 (2)	192.23	1.38e-06	16.69	Alcohol dehydrogenase 1C OS=Homo sapiens GN=ADH1C PE=1 SV=2	751000	12500000	2450000	0.306531	5.10204	0.306531	-0.513526	5.86012
ADHX_HUMAN	7 (6)	217.54	0.00043	2	Alcohol dehydrogenase class-3 OS=Homo sapiens GN=ADH5 PE=1 SV=4	16700000	27000000	13500000	1.23704	2	2	0.30103	3.36653
ADRM1_HUMAN	1 (1)	49.96	0.01	175.22	Proteasomal ubiquitin receptor ADRM1 OS=Homo sapiens GN=ADRM1 PE=1 SV=2	1520000	1470000	8651.82	175.686	169.906	175.686	2.24474	2
ADT1_HUMAN	9 (1)	401.46	0.0003	20.59	ADP/ATP translocase 1 OS=Homo sapiens GN=SLC25A4 PE=1 SV=4	527000	1130000	54800	9.61679	20.6204	20.6204	1.3143	3.52288
ADT2_HUMAN	13 (4)	540.43	0.001	2.01	ADP/ATP translocase 2 OS=Homo sapiens GN=SLC25A5 PE=1 SV=7	31700000	36800000	18300000	1.73224	2.01093	2.01093	0.303397	3
AEBP1_HUMAN	16 (15)	597.43	8.53e-06	6.12	Adipocyte enhancer-binding protein 1 OS=Homo sapiens GN=AEBP1 PE=1 SV=1	138000000	55700000	22500000	6.13333	2.47556	6.13333	0.787697	5.06905
AFG32_HUMAN	1 (1)	27.01	0.00305	11	AFG3-like protein 2 OS=Homo sapiens GN=AFG3L2 PE=1 SV=2	1560000	3220000	293000	5.32423	10.9898	10.9898	1.04099	2.5157
AGO2_HUMAN	1 (1)	16.52	9.16e-06	8.37	Protein argonaute-2 OS=Homo sapiens GN=AGO2 PE=1 SV=3	335000	977000	117000	2.86325	8.35043	8.35043	0.921709	5.0381
AGR2_HUMAN	2 (2)	60.73	2.01e-07	9.43	Anterior gradient protein 2 homolog OS=Homo sapiens GN=AGR2 PE=1 SV=1	2900000	27400000	8560000	0.338785	3.20093	0.338785	-0.470076	6.6968
AGR3_HUMAN	1 (1)	40.64	2.6e-07	5.81	Anterior gradient protein 3 OS=Homo sapiens GN=AGR3 PE=1 SV=1	869000	5050000	4170000	0.208393	1.21103	0.208393	-0.681116	6.58503
AHNK_HUMAN	91 (76)	3712.06	7.2e-07	3.34	Neuroblast differentiation-associated protein AHNAK OS=Homo sapiens GN=AHNAK PE=1 SV=2	318000000	437000000	131000000	2.42748	3.33588	3.33588	0.52321	6.14267
AHNK2_HUMAN	5 (3)	224.6	2.55e-06	12.06	Protein AHNAK2 OS=Homo sapiens GN=AHNAK2 PE=1 SV=2	752000	9070000	2000000	0.376	4.535	0.376	-0.424812	5.59346
AIF1_HUMAN	1 (1)	36.67	1.12e-05	1.73	Allograft inflammatory factor 1 OS=Homo sapiens GN=AIF1 PE=1 SV=1	1530000	1760000	1020000	1.5	1.72549	1.72549	0.236912	4.95078
AIF1L_HUMAN	1 (1)	52.93	1.66e-05	12.73	Allograft inflammatory factor 1-like OS=Homo sapiens GN=AIF1L PE=1 SV=1	773000	341000	60800	12.7138	5.60855	12.7138	1.10428	4.77989
AIFM1_HUMAN	13 (12)	615.6	0.000107	4.2	Apoptosis-inducing factor 1, mitochondrial OS=Homo sapiens GN=AIFM1 PE=1 SV=1	83600000	47300000	19900000	4.20101	2.37688	4.20101	0.623353	3.97062
AIMP2_HUMAN	3 (2)	81.25	0.00982	7.07	Aminoacyl tRNA synthase complex-interacting multifunctional protein 2 OS=Homo sapiens GN=AIMP2 PE=1 SV=2	4700000	5070000	717000	6.55509	7.07113	7.07113	0.849489	2.00789
AIP_HUMAN	1 (1)	49.93	0.00938	5.02	AH receptor-interacting protein OS=Homo sapiens GN=AIP PE=1 SV=2	1400000	2140000	427000	3.27869	5.01171	5.01171	0.699986	2.0278
AK1A1_HUMAN	8 (8)	290.83	0.000964	2.24	Alcohol dehydrogenase [NADP(+)] OS=Homo sapiens GN=AKR1A1 PE=1 SV=3	34700000	39600000	17700000	1.96045	2.23729	2.23729	0.349722	3.01592
AK1BA_HUMAN	3 (2)	139.12	0.000208	7.88	Aldo-keto reductase family 1 member B10 OS=Homo sapiens GN=AKR1B10 PE=1 SV=2	1190000	2040000	9360000	0.127137	0.217949	0.127137	-0.895729	3.68194
AKA12_HUMAN	1 (1)	15.93	0.000317	3.89	A-kinase anchor protein 12 OS=Homo sapiens GN=AKAP12 PE=1 SV=4	537000	2090000	920000	0.583696	2.27174	0.583696	-0.233814	3.49894
AKT1_HUMAN	1 (1)	33.44	0.01	1.91	RAC-alpha serine/threonine-protein kinase OS=Homo sapiens GN=AKT1 PE=1 SV=2	2760000	4920000	5270000	0.523719	0.933586	0.523719	-0.280902	2
AL1A1_HUMAN	6 (4)	209.91	5.17e-06	11.65	Retinal dehydrogenase 1 OS=Homo sapiens GN=ALDH1A1 PE=1 SV=2	5070000	14600000	1250000	4.056	11.68	11.68	1.06744	5.28651
AL1A3_HUMAN	5 (3)	204.11	7e-07	33.98	Aldehyde dehydrogenase family 1 member A3 OS=Homo sapiens GN=ALDH1A3 PE=1 SV=2	256000	455000	8710000	0.0293915	0.0522388	0.0293915	-1.53178	6.1549
AL7A1_HUMAN	7 (7)	289.81	1.91e-05	3.12	Alpha-aminoadipic semialdehyde dehydrogenase OS=Homo sapiens GN=ALDH7A1 PE=1 SV=5	26900000	28000000	8960000	3.00223	3.125	3.125	0.49485	4.71897
AL9A1_HUMAN	7 (7)	367.25	0.02	1.84	4-trimethylaminobutyraldehyde dehydrogenase OS=Homo sapiens GN=ALDH9A1 PE=1 SV=3	18700000	28600000	15500000	1.20645	1.84516	1.84516	0.266034	1.69897
ALDOC_HUMAN	6 (2)	247.51	0.00457	3.39	Fructose-bisphosphate aldolase C OS=Homo sapiens GN=ALDOC PE=1 SV=2	1170000	2770000	3970000	0.29471	0.697733	0.29471	-0.530605	2.34008
AMBP_HUMAN	5 (5)	212.14	2.77e-05	3.15	Protein AMBP OS=Homo sapiens GN=AMBP PE=1 SV=1	17600000	13000000	5590000	3.14848	2.32558	3.14848	0.498101	4.55752
AMPL_HUMAN	16 (13)	924.39	1.28e-06	5	Cytosol aminopeptidase OS=Homo sapiens GN=LAP3 PE=1 SV=3	150000000	79600000	29900000	5.01672	2.66221	5.01672	0.70042	5.89279
AMPN_HUMAN	5 (4)	170.76	7.29e-06	2.92	Aminopeptidase N OS=Homo sapiens GN=ANPEP PE=1 SV=4	2950000	8510000	2910000	1.01375	2.9244	2.9244	0.466037	5.13727
AMRP_HUMAN	1 (1)	31.49	0.00112	5.12	Alpha-2-macroglobulin receptor-associated protein OS=Homo sapiens GN=LRPAP1 PE=1 SV=1	1630000	840000	318000	5.12579	2.64151	5.12579	0.70976	2.95078
AN32A_HUMAN	8 (3)	424.17	0.02	2.17	Acidic leucine-rich nuclear phosphoprotein 32 family member A OS=Homo sapiens GN=ANP32A PE=1 SV=1	16100000	19500000	35000000	0.46	0.557143	0.46	-0.337242	1.69897
ANM1_HUMAN	4 (4)	162.03	0.000164	1.91	Protein arginine N-methyltransferase 1 OS=Homo sapiens GN=PRMT1 PE=1 SV=2	6020000	11500000	11100000	0.542342	1.03604	0.542342	-0.265726	3.78516
ANT3_HUMAN	3 (3)	92.47	0.00465	3.36	Antithrombin-III OS=Homo sapiens GN=SERPINC1 PE=1 SV=1	9120000	3800000	2710000	3.36531	1.40221	3.36531	0.527026	2.33255
ANXA1_HUMAN	19 (19)	1027.46	1.34e-06	4.45	Annexin A1 OS=Homo sapiens GN=ANXA1 PE=1 SV=2	230000000	462000000	104000000	2.21154	4.44231	4.44231	0.647609	5.8729
ANXA2_HUMAN	24 (7)	1342.08	3.29e-06	5.93	Annexin A2 OS=Homo sapiens GN=ANXA2 PE=1 SV=2	89100000	326000000	55000000	1.62	5.92727	5.92727	0.772855	5.4828
ANXA3_HUMAN	8 (8)	299.4	4.39e-06	2.89	Annexin A3 OS=Homo sapiens GN=ANXA3 PE=1 SV=3	26400000	22500000	9110000	2.89791	2.46981	2.89791	0.462086	5.35754
ANXA5_HUMAN	19 (16)	1156.64	6.67e-05	2.3	Annexin A5 OS=Homo sapiens GN=ANXA5 PE=1 SV=2	152000000	286000000	349000000	0.43553	0.819484	0.43553	-0.360982	4.17587
ANXA6_HUMAN	26 (24)	964.41	4.54e-07	2.12	Annexin A6 OS=Homo sapiens GN=ANXA6 PE=1 SV=3	126000000	258000000	122000000	1.03279	2.11475	2.11475	0.32526	6.34294
ANXA7_HUMAN	9 (8)	411.59	5.17e-06	3.16	Annexin A7 OS=Homo sapiens GN=ANXA7 PE=1 SV=3	15900000	32500000	10300000	1.54369	3.15534	3.15534	0.499046	5.28651
AOFA_HUMAN	2 (2)	96.75	6.64e-05	8.35	Amine oxidase [flavin-containing] A OS=Homo sapiens GN=MAOA PE=1 SV=1	2500000	8140000	975000	2.5641	8.34872	8.34872	0.92162	4.17783
AP1B1_HUMAN	9 (3)	272.91	0.01	2.31	AP-1 complex subunit beta-1 OS=Homo sapiens GN=AP1B1 PE=1 SV=2	4560000	3490000	1970000	2.31472	1.77157	2.31472	0.364499	2
AP1G1_HUMAN	4 (4)	85.99	0.00393	1.52	AP-1 complex subunit gamma-1 OS=Homo sapiens GN=AP1G1 PE=1 SV=5	9330000	6570000	6130000	1.52202	1.07178	1.52202	0.182421	2.40561
AP1M2_HUMAN	1 (1)	23.51	0.000855	7.52	AP-1 complex subunit mu-2 OS=Homo sapiens GN=AP1M2 PE=1 SV=4	553000	1150000	153000	3.61438	7.51634	7.51634	0.876006	3.06803
AP2B1_HUMAN	7 (2)	216.9	0.02	4.82	AP-2 complex subunit beta OS=Homo sapiens GN=AP2B1 PE=1 SV=1	2630000	3390000	703000	3.74111	4.82219	4.82219	0.683244	1.69897
AP2M1_HUMAN	4 (4)	111.01	3.82e-06	3.22	AP-2 complex subunit mu OS=Homo sapiens GN=AP2M1 PE=1 SV=2	5410000	5750000	1790000	3.02235	3.21229	3.21229	0.506815	5.41794
APOA2_HUMAN	4 (4)	152.51	0.00122	1.52	Apolipoprotein A-II OS=Homo sapiens GN=APOA2 PE=1 SV=1	34600000	22900000	34400000	1.00581	0.665698	0.665698	-0.176723	2.91364
APOB_HUMAN	31 (22)	927.71	8.75e-06	4.8	Apolipoprotein B-100 OS=Homo sapiens GN=APOB PE=1 SV=2	37600000	25000000	7830000	4.80204	3.19285	4.80204	0.681426	5.05799
APOC1_HUMAN	2 (2)	78.59	0.000682	1.54	Apolipoprotein C-I OS=Homo sapiens GN=APOC1 PE=1 SV=1	18500000	19400000	12600000	1.46825	1.53968	1.53968	0.187431	3.16622
APOC3_HUMAN	2 (2)	133.78	3.63e-07	15.37	Apolipoprotein C-III OS=Homo sapiens GN=APOC3 PE=1 SV=1	1660000	13700000	893000	1.8589	15.3415	15.3415	1.18587	6.44009
APOE_HUMAN	12 (12)	473.06	0.000645	3.75	Apolipoprotein E OS=Homo sapiens GN=APOE PE=1 SV=1	79100000	33600000	21100000	3.74882	1.59242	3.74882	0.573894	3.19044
APOH_HUMAN	6 (6)	309.29	4.15e-06	3.08	Beta-2-glycoprotein 1 OS=Homo sapiens GN=APOH PE=1 SV=3	53100000	40300000	17200000	3.08721	2.34302	3.08721	0.489566	5.38195
APOL1_HUMAN	1 (1)	25.68	0.02	277.29	Apolipoprotein L1 OS=Homo sapiens GN=APOL1 PE=1 SV=5	1080000	329000	3911.64	276.099	84.1079	276.099	2.44106	1.69897
APOL2_HUMAN	4 (3)	160.61	0.00243	3.26	Apolipoprotein L2 OS=Homo sapiens GN=APOL2 PE=1 SV=1	5530000	6400000	1960000	2.82143	3.26531	3.26531	0.513924	2.61439
APT_HUMAN	3 (3)	102.6	0.000146	2.84	Adenine phosphoribosyltransferase OS=Homo sapiens GN=APRT PE=1 SV=2	15300000	16700000	5880000	2.60204	2.84014	2.84014	0.453339	3.83565
ARF5_HUMAN	6 (2)	232.19	0.000316	3.43	ADP-ribosylation factor 5 OS=Homo sapiens GN=ARF5 PE=1 SV=2	4540000	6310000	1840000	2.46739	3.42935	3.42935	0.535212	3.50031
ARFP1_HUMAN	1 (1)	24.18	0.0032	4.22	Arfaptin-1 OS=Homo sapiens GN=ARFIP1 PE=1 SV=2	1010000	1470000	349000	2.89398	4.21203	4.21203	0.624492	2.49485
ARHL2_HUMAN	2 (2)	137.87	0.000313	39.83	Poly(ADP-ribose) glycohydrolase ARH3 OS=Homo sapiens GN=ADPRHL2 PE=1 SV=1	3630000	2250000	91300	39.759	24.644	39.759	1.59944	3.50446
ARK72_HUMAN	3 (3)	128.07	1.36e-05	2.79	Aflatoxin B1 aldehyde reductase member 2 OS=Homo sapiens GN=AKR7A2 PE=1 SV=3	10400000	17700000	28900000	0.359862	0.612457	0.359862	-0.443865	4.86646
ARLY_HUMAN	2 (2)	56.97	0.00082	3.85	Argininosuccinate lyase OS=Homo sapiens GN=ASL PE=1 SV=4	1870000	4480000	1160000	1.61207	3.86207	3.86207	0.58682	3.08619
ARMX4_HUMAN	1 (1)	21.77	0.00783	3.88	Armadillo repeat-containing X-linked protein 4 OS=Homo sapiens GN=ARMCX4 PE=2 SV=2	1180000	2910000	4580000	0.257642	0.635371	0.257642	-0.588983	2.10624
ARP2_HUMAN	7 (5)	271.52	6.83e-05	2.67	Actin-related protein 2 OS=Homo sapiens GN=ACTR2 PE=1 SV=1	32900000	32600000	12300000	2.6748	2.65041	2.6748	0.427291	4.16558
ARP3_HUMAN	14 (11)	467.04	0.00134	2.3	Actin-related protein 3 OS=Homo sapiens GN=ACTR3 PE=1 SV=3	54400000	83900000	36500000	1.49041	2.29863	2.29863	0.361469	2.8729
ARP5L_HUMAN	3 (2)	85.12	0.01	3.5	Actin-related protein 2/3 complex subunit 5-like protein OS=Homo sapiens GN=ARPC5L PE=1 SV=1	5770000	8820000	2520000	2.28968	3.5	3.5	0.544068	2
ARPC2_HUMAN	7 (7)	200.05	0.00029	1.83	Actin-related protein 2/3 complex subunit 2 OS=Homo sapiens GN=ARPC2 PE=1 SV=1	31000000	49800000	27200000	1.13971	1.83088	1.83088	0.26266	3.5376
ARPC4_HUMAN	5 (5)	197.57	2.42e-05	1.96	Actin-related protein 2/3 complex subunit 4 OS=Homo sapiens GN=ARPC4 PE=1 SV=3	19700000	35900000	18300000	1.0765	1.96175	1.96175	0.292643	4.61618
ARPC5_HUMAN	4 (2)	177.73	0.00138	1.81	Actin-related protein 2/3 complex subunit 5 OS=Homo sapiens GN=ARPC5 PE=1 SV=3	11900000	18000000	9950000	1.19598	1.80905	1.80905	0.257449	2.86012
ASAH1_HUMAN	5 (4)	152.85	0.000145	2.04	Acid ceramidase OS=Homo sapiens GN=ASAH1 PE=1 SV=5	18200000	23700000	11600000	1.56897	2.0431	2.0431	0.31029	3.83863
ASC_HUMAN	4 (4)	133.48	2.6e-05	2.05	Apoptosis-associated speck-like protein containing a CARD OS=Homo sapiens GN=PYCARD PE=1 SV=2	3690000	5000000	2450000	1.50612	2.04082	2.04082	0.309804	4.58503
ASNA_HUMAN	4 (4)	113.51	0.0012	1.61	ATPase ASNA1 OS=Homo sapiens GN=ASNA1 PE=1 SV=2	5740000	7470000	4630000	1.23974	1.61339	1.61339	0.20774	2.92082
ASPH_HUMAN	8 (7)	281.16	0.000995	1.67	Aspartyl/asparaginyl beta-hydroxylase OS=Homo sapiens GN=ASPH PE=1 SV=3	13900000	21500000	12900000	1.07752	1.66667	1.66667	0.221849	3.00218
ASSY_HUMAN	8 (8)	272.35	0.000247	2.36	Argininosuccinate synthase OS=Homo sapiens GN=ASS1 PE=1 SV=2	52900000	54500000	23100000	2.29004	2.35931	2.35931	0.372785	3.6073
ASTN2_HUMAN	1 (1)	30.6	9.67e-05	3.85	Astrotactin-2 OS=Homo sapiens GN=ASTN2 PE=2 SV=2	1650000	428000	1590000	1.03774	0.269182	0.269182	-0.569953	4.01457
AT1A1_HUMAN	18 (8)	792.18	5.62e-06	2.32	Sodium/potassium-transporting ATPase subunit alpha-1 OS=Homo sapiens GN=ATP1A1 PE=1 SV=1	36600000	43300000	18700000	1.95722	2.31551	2.31551	0.364646	5.25026
AT1B1_HUMAN	4 (4)	131.08	0.000182	5.04	Sodium/potassium-transporting ATPase subunit beta-1 OS=Homo sapiens GN=ATP1B1 PE=1 SV=1	13800000	14400000	2860000	4.82517	5.03497	5.03497	0.701996	3.73993
AT2A2_HUMAN	16 (6)	752.56	0.00218	2.06	Sarcoplasmic/endoplasmic reticulum calcium ATPase 2 OS=Homo sapiens GN=ATP2A2 PE=1 SV=1	17200000	20800000	35500000	0.484507	0.585915	0.484507	-0.3147	2.66154
ATD3A_HUMAN	3 (2)	79.33	0.000901	6.81	ATPase family AAA domain-containing protein 3A OS=Homo sapiens GN=ATAD3A PE=1 SV=2	980000	955000	6500000	0.150769	0.146923	0.146923	-0.83291	3.04528
ATG3_HUMAN	2 (2)	52.35	6.42e-06	5.71	Ubiquitin-like-conjugating enzyme ATG3 OS=Homo sapiens GN=ATG3 PE=1 SV=1	5930000	3380000	1040000	5.70192	3.25	5.70192	0.756021	5.19246
ATLA3_HUMAN	3 (3)	84.2	0.00661	5.23	Atlastin-3 OS=Homo sapiens GN=ATL3 PE=1 SV=1	4100000	2040000	784000	5.22959	2.60204	5.22959	0.718468	2.1798
ATP5J_HUMAN	4 (4)	129.27	8.66e-05	1.58	ATP synthase-coupling factor 6, mitochondrial OS=Homo sapiens GN=ATP5J PE=1 SV=1	25300000	22200000	16000000	1.58125	1.3875	1.58125	0.199001	4.06248
ATP5L_HUMAN	3 (3)	138.05	0.000245	2.01	ATP synthase subunit g, mitochondrial OS=Homo sapiens GN=ATP5L PE=1 SV=3	13400000	11600000	6660000	2.01201	1.74174	2.01201	0.303631	3.61083
ATPK_HUMAN	2 (2)	77.67	0.00101	46.87	ATP synthase subunit f, mitochondrial OS=Homo sapiens GN=ATP5J2 PE=1 SV=3	939000	4060000	86600	10.843	46.8822	46.8822	1.67101	2.99568
ATX2L_HUMAN	1 (1)	35.08	0.0055	3.69	Ataxin-2-like protein OS=Homo sapiens GN=ATXN2L PE=1 SV=2	934000	726000	253000	3.6917	2.86957	3.6917	0.567226	2.25964
B2MG_HUMAN	3 (3)	103.07	0.00348	3	Beta-2-microglobulin OS=Homo sapiens GN=B2M PE=1 SV=1	29600000	44300000	14800000	2	2.99324	2.99324	0.476142	2.45842
BAF_HUMAN	3 (3)	59.52	7.23e-05	2.53	Barrier-to-autointegration factor OS=Homo sapiens GN=BANF1 PE=1 SV=1	9530000	24200000	19800000	0.481313	1.22222	0.481313	-0.317572	4.14086
BAX_HUMAN	2 (2)	60.01	6.9e-05	4.76	Apoptosis regulator BAX OS=Homo sapiens GN=BAX PE=1 SV=1	3400000	4150000	871000	3.90356	4.76464	4.76464	0.67803	4.16115
BCAM_HUMAN	13 (11)	637.39	2.89e-05	8.45	Basal cell adhesion molecule OS=Homo sapiens GN=BCAM PE=1 SV=2	46500000	37400000	5500000	8.45455	6.8	8.45455	0.92709	4.5391
BCAT1_HUMAN	4 (4)	136.5	0.000437	2.47	Branched-chain-amino-acid aminotransferase, cytosolic OS=Homo sapiens GN=BCAT1 PE=1 SV=3	8870000	21900000	14300000	0.62028	1.53147	0.62028	-0.207412	3.35952
BCL10_HUMAN	1 (1)	14.19	6.5e-05	4.94	B-cell lymphoma/leukemia 10 OS=Homo sapiens GN=BCL10 PE=1 SV=1	519000	1750000	2560000	0.202734	0.683594	0.202734	-0.693073	4.18709
BDH_HUMAN	1 (1)	27.17	0.000246	12.9	D-beta-hydroxybutyrate dehydrogenase, mitochondrial OS=Homo sapiens GN=BDH1 PE=1 SV=3	946000	2580000	200000	4.73	12.9	12.9	1.11059	3.60906
BDH2_HUMAN	2 (2)	67.7	3.22e-06	2.29	3-hydroxybutyrate dehydrogenase type 2 OS=Homo sapiens GN=BDH2 PE=1 SV=2	8680000	8840000	3860000	2.2487	2.29016	2.29016	0.359865	5.49214
BGH3_HUMAN	7 (6)	229.13	1.18e-07	12.82	Transforming growth factor-beta-induced protein ig-h3 OS=Homo sapiens GN=TGFBI PE=1 SV=1	58400000	20100000	4550000	12.8352	4.41758	12.8352	1.1084	6.92812
BIEA_HUMAN	4 (4)	106.28	0.01	3.95	Biliverdin reductase A OS=Homo sapiens GN=BLVRA PE=1 SV=2	12000000	7260000	3040000	3.94737	2.38816	3.94737	0.596308	2
BIN1_HUMAN	1 (1)	25.35	0.000522	3.94	Myc box-dependent-interacting protein 1 OS=Homo sapiens GN=BIN1 PE=1 SV=1	1370000	1300000	347000	3.94813	3.7464	3.94813	0.596391	3.28233
BLVRB_HUMAN	3 (3)	119.16	1.2e-07	3.92	Flavin reductase (NADPH) OS=Homo sapiens GN=BLVRB PE=1 SV=3	25000000	18700000	6380000	3.9185	2.93103	3.9185	0.593119	6.92082
BUB3_HUMAN	2 (2)	38.89	0.01	7.35	Mitotic checkpoint protein BUB3 OS=Homo sapiens GN=BUB3 PE=1 SV=1	2020000	1780000	276000	7.31884	6.44928	7.31884	0.864442	2
BUD31_HUMAN	2 (2)	66.57	0.00549	12.48	Protein BUD31 homolog OS=Homo sapiens GN=BUD31 PE=1 SV=2	1780000	483000	143000	12.4476	3.37762	12.4476	1.09508	2.26043
C163A_HUMAN	4 (4)	156.51	0.00121	8.04	Scavenger receptor cysteine-rich type 1 protein M130 OS=Homo sapiens GN=CD163 PE=1 SV=2	5270000	2590000	655000	8.0458	3.9542	8.0458	0.905569	2.91721
C1QB_HUMAN	2 (1)	118.33	0.00769	16.36	Complement C1q subcomponent subunit B OS=Homo sapiens GN=C1QB PE=1 SV=3	7340000	1870000	449000	16.3474	4.16481	16.3474	1.21345	2.11407
C1QBP_HUMAN	6 (6)	372.14	0.000814	1.9	Complement component 1 Q subcomponent-binding protein, mitochondrial OS=Homo sapiens GN=C1QBP PE=1 SV=1	31400000	40800000	21500000	1.46047	1.89767	1.89767	0.278222	3.08938
C1R_HUMAN	5 (5)	216.39	0.00164	1.93	Complement C1r subcomponent OS=Homo sapiens GN=C1R PE=1 SV=2	20100000	10400000	12000000	1.675	0.866667	1.675	0.224015	2.78516
C1S_HUMAN	2 (2)	37.7	0.00388	18.19	Complement C1s subcomponent OS=Homo sapiens GN=C1S PE=1 SV=1	3130000	525000	172000	18.1977	3.05233	18.1977	1.26002	2.41117
C4BPA_HUMAN	9 (8)	399.8	6.11e-06	4.14	C4b-binding protein alpha chain OS=Homo sapiens GN=C4BPA PE=1 SV=2	93500000	169000000	40800000	2.29167	4.14216	4.14216	0.617227	5.21396
CA123_HUMAN	2 (2)	43.42	0.02	1.94	UPF0587 protein C1orf123 OS=Homo sapiens GN=C1orf123 PE=1 SV=1	2080000	2060000	1070000	1.94393	1.92523	1.94393	0.28868	1.69897
CACB2_HUMAN	1 (1)	14.34	3.38e-05	4.86	Voltage-dependent L-type calcium channel subunit beta-2 OS=Homo sapiens GN=CACNB2 PE=1 SV=3	234000	518000	1140000	0.205263	0.454386	0.205263	-0.687689	4.47108
CACP_HUMAN	1 (1)	27.7	0.0071	2.46	Carnitine O-acetyltransferase OS=Homo sapiens GN=CRAT PE=1 SV=5	1640000	668000	1370000	1.19708	0.487591	0.487591	-0.311944	2.14874
CAD17_HUMAN	5 (5)	129.24	0.000434	6.44	Cadherin-17 OS=Homo sapiens GN=CDH17 PE=2 SV=3	5430000	23200000	3600000	1.50833	6.44444	6.44444	0.809185	3.36251
CADH1_HUMAN	3 (2)	73.31	5.91e-05	45.13	Cadherin-1 OS=Homo sapiens GN=CDH1 PE=1 SV=3	2940000	1170000	65200	45.092	17.9448	45.092	1.6541	4.22841
CAH1_HUMAN	5 (5)	246.39	2.72e-07	7.14	Carbonic anhydrase 1 OS=Homo sapiens GN=CA1 PE=1 SV=2	71100000	25300000	9960000	7.13855	2.54016	7.13855	0.85361	6.56543
CAH2_HUMAN	6 (5)	177.57	0.000623	3.66	Carbonic anhydrase 2 OS=Homo sapiens GN=CA2 PE=1 SV=2	28500000	28500000	7780000	3.66324	3.66324	3.66324	0.563865	3.20551
CAH9_HUMAN	2 (2)	94.38	0.00129	22.95	Carbonic anhydrase 9 OS=Homo sapiens GN=CA9 PE=1 SV=2	981000	250000	5730000	0.171204	0.04363	0.04363	-1.36021	2.88941
CALB2_HUMAN	7 (4)	300.65	0.00172	3.35	Calretinin OS=Homo sapiens GN=CALB2 PE=2 SV=2	14000000	16300000	47000000	0.297872	0.346809	0.297872	-0.52597	2.76447
CALD1_HUMAN	20 (17)	827.45	9.18e-07	2.37	Caldesmon OS=Homo sapiens GN=CALD1 PE=1 SV=3	101000000	106000000	44700000	2.25951	2.37136	2.37136	0.374998	6.03716
CALM_HUMAN	7 (5)	308.4	2.07e-06	3.32	Calmodulin OS=Homo sapiens GN=CALM1 PE=1 SV=2	36800000	122000000	39700000	0.926952	3.07305	3.07305	0.487569	5.68403
CALR_HUMAN	17 (17)	777.43	0.00172	1.75	Calreticulin OS=Homo sapiens GN=CALR PE=1 SV=1	249000000	359000000	206000000	1.20874	1.74272	1.74272	0.241227	2.76447
CAN1_HUMAN	18 (15)	595.44	0.000246	3.02	Calpain-1 catalytic subunit OS=Homo sapiens GN=CAPN1 PE=1 SV=1	47900000	78900000	26200000	1.82824	3.01145	3.01145	0.478776	3.60906
CAP1_HUMAN	11 (11)	536.34	0.001	2.07	Adenylyl cyclase-associated protein 1 OS=Homo sapiens GN=CAP1 PE=1 SV=5	70700000	87600000	42400000	1.66745	2.06604	2.06604	0.315138	3
CAPG_HUMAN	7 (7)	397.48	2.01e-09	9.82	Macrophage-capping protein OS=Homo sapiens GN=CAPG PE=1 SV=2	41300000	52600000	5360000	7.70522	9.81343	9.81343	0.991821	8.6968
CAPZB_HUMAN	8 (8)	351.75	0.00034	2.1	F-actin-capping protein subunit beta OS=Homo sapiens GN=CAPZB PE=1 SV=4	36100000	60300000	28700000	1.25784	2.10105	2.10105	0.322435	3.46852
CATA_HUMAN	10 (9)	412.11	0.00046	3.19	Catalase OS=Homo sapiens GN=CAT PE=1 SV=3	33900000	36700000	11500000	2.94783	3.1913	3.1913	0.503968	3.33724
CATD_HUMAN	6 (6)	290.54	0.000223	2.96	Cathepsin D OS=Homo sapiens GN=CTSD PE=1 SV=1	49200000	85900000	29100000	1.69072	2.95189	2.95189	0.4701	3.6517
CATG_HUMAN	3 (3)	131.39	0.00013	6.44	Cathepsin G OS=Homo sapiens GN=CTSG PE=1 SV=2	5160000	11400000	1770000	2.91525	6.44068	6.44068	0.808932	3.88606
CATH_HUMAN	1 (1)	39.96	0.000567	13.1	Pro-cathepsin H OS=Homo sapiens GN=CTSH PE=1 SV=4	554000	1580000	121000	4.57851	13.0579	13.0579	1.11587	3.24642
CATL1_HUMAN	2 (2)	51.58	0.00186	6.3	Cathepsin L1 OS=Homo sapiens GN=CTSL PE=1 SV=2	4240000	2930000	673000	6.30015	4.35364	6.30015	0.799351	2.73049
CATZ_HUMAN	4 (4)	118.67	0.000786	9.02	Cathepsin Z OS=Homo sapiens GN=CTSZ PE=1 SV=1	14800000	12800000	1650000	8.9697	7.75758	8.9697	0.952778	3.10458
CAV1_HUMAN	2 (2)	55.55	5.3e-06	11.71	Caveolin-1 OS=Homo sapiens GN=CAV1 PE=1 SV=4	1860000	12800000	1090000	1.70642	11.7431	11.7431	1.06978	5.27572
CAYP1_HUMAN	2 (2)	47.11	0.02	4.88	Calcyphosin OS=Homo sapiens GN=CAPS PE=1 SV=1	2960000	3750000	767000	3.85919	4.88918	4.88918	0.689236	1.69897
CAZA1_HUMAN	6 (5)	275.34	1.22e-05	7.5	F-actin-capping protein subunit alpha-1 OS=Homo sapiens GN=CAPZA1 PE=1 SV=3	13100000	8710000	1740000	7.52874	5.00575	7.52874	0.876722	4.91364
CAZA2_HUMAN	5 (3)	202.44	0.00378	14.68	F-actin-capping protein subunit alpha-2 OS=Homo sapiens GN=CAPZA2 PE=1 SV=3	7060000	5100000	481000	14.6778	10.6029	14.6778	1.16666	2.42251
CBLB_HUMAN	1 (1)	17.31	0.00857	4.21	E3 ubiquitin-protein ligase CBL-B OS=Homo sapiens GN=CBLB PE=1 SV=2	490000	333000	1400000	0.35	0.237857	0.237857	-0.623684	2.06702
CBPB2_HUMAN	1 (1)	47.38	0.01	4.99	Carboxypeptidase B2 OS=Homo sapiens GN=CPB2 PE=1 SV=2	1090000	642000	217000	5.02304	2.95853	5.02304	0.700967	2
CBR1_HUMAN	5 (3)	245.52	0.000431	3.31	Carbonyl reductase [NADPH] 1 OS=Homo sapiens GN=CBR1 PE=1 SV=3	7030000	4180000	2130000	3.30047	1.96244	3.30047	0.518576	3.36552
CBX3_HUMAN	6 (4)	226.87	0.000142	2.17	Chromobox protein homolog 3 OS=Homo sapiens GN=CBX3 PE=1 SV=4	14000000	12700000	6430000	2.17729	1.97512	2.17729	0.337917	3.84771
CCD80_HUMAN	2 (2)	88.38	0.00464	8.29	Coiled-coil domain-containing protein 80 OS=Homo sapiens GN=CCDC80 PE=1 SV=1	2150000	1050000	259000	8.30116	4.05405	8.30116	0.919139	2.33348
CCHL_HUMAN	2 (2)	113.5	0.00349	7.63	Cytochrome c-type heme lyase OS=Homo sapiens GN=HCCS PE=1 SV=1	1940000	2620000	343000	5.65598	7.63848	7.63848	0.883007	2.45717
CD151_HUMAN	1 (1)	26.35	0.00224	7.9	CD151 antigen OS=Homo sapiens GN=CD151 PE=1 SV=3	967000	1730000	219000	4.41553	7.89954	7.89954	0.897602	2.64975
CD158_HUMAN	1 (1)	16.05	0.0008	279000	Coiled-coil domain-containing protein 158 OS=Homo sapiens GN=CCDC158 PE=1 SV=2	14.46	4483.94	4030000	3.58809e-06	0.00111264	3.58809e-06	-5.44514	3.09691
CD166_HUMAN	4 (4)	168.13	6.66e-05	4.81	CD166 antigen OS=Homo sapiens GN=ALCAM PE=1 SV=2	14200000	27200000	5650000	2.51327	4.81416	4.81416	0.68252	4.17653
CD209_HUMAN	2 (2)	69.85	3.38e-05	5.93	CD209 antigen OS=Homo sapiens GN=CD209 PE=1 SV=1	1520000	2650000	9010000	0.168701	0.294118	0.168701	-0.772881	4.47108
CD44_HUMAN	5 (5)	296.63	0.00721	2.1	CD44 antigen OS=Homo sapiens GN=CD44 PE=1 SV=3	21700000	18100000	10400000	2.08654	1.74038	2.08654	0.319426	2.14206
CD47_HUMAN	3 (3)	77.24	0.000324	5.05	Leukocyte surface antigen CD47 OS=Homo sapiens GN=CD47 PE=1 SV=1	23700000	43500000	8630000	2.74623	5.04056	5.04056	0.702478	3.48945
CD59_HUMAN	3 (3)	116.34	0.00385	2.94	CD59 glycoprotein OS=Homo sapiens GN=CD59 PE=1 SV=1	16200000	27100000	9220000	1.75705	2.93926	2.93926	0.468238	2.41454
CD81_HUMAN	2 (2)	59.35	2.83e-06	31.03	CD81 antigen OS=Homo sapiens GN=CD81 PE=1 SV=1	5910000	19400000	625000	9.456	31.04	31.04	1.49192	5.54821
CD9_HUMAN	3 (3)	136.25	0.00275	2.15	CD9 antigen OS=Homo sapiens GN=CD9 PE=1 SV=4	20500000	19000000	9530000	2.1511	1.9937	2.1511	0.332661	2.56067
CDC37_HUMAN	8 (7)	281.11	3.38e-06	2.42	Hsp90 co-chaperone Cdc37 OS=Homo sapiens GN=CDC37 PE=1 SV=1	20300000	18200000	8380000	2.42243	2.17184	2.42243	0.384252	5.47108
CELF2_HUMAN	1 (1)	22.01	0.01	7.94	CUGBP Elav-like family member 2 OS=Homo sapiens GN=CELF2 PE=1 SV=1	911000	530000	115000	7.92174	4.6087	7.92174	0.898821	2
CENPE_HUMAN	1 (1)	14.57	0.02	5.24	Centromere-associated protein E OS=Homo sapiens GN=CENPE PE=1 SV=2	4710000	6560000	24700000	0.190688	0.265587	0.190688	-0.719676	1.69897
CERS2_HUMAN	1 (1)	44.35	2.53e-05	4.5	Ceramide synthase 2 OS=Homo sapiens GN=CERS2 PE=1 SV=1	1020000	3800000	4610000	0.221258	0.824295	0.221258	-0.655101	4.59688
CERU_HUMAN	17 (17)	816.24	3.44e-05	3.09	Ceruloplasmin OS=Homo sapiens GN=CP PE=1 SV=1	78100000	71300000	25200000	3.09921	2.82937	3.09921	0.49125	4.46344
CFAB_HUMAN	15 (10)	644.95	2.55e-06	2.68	Complement factor B OS=Homo sapiens GN=CFB PE=1 SV=2	81900000	72300000	30500000	2.68525	2.37049	2.68525	0.428984	5.59346
CFAH_HUMAN	24 (20)	944.92	1.48e-05	5.41	Complement factor H OS=Homo sapiens GN=CFH PE=1 SV=4	104000000	78400000	19200000	5.41667	4.08333	5.41667	0.733732	4.82974
CFAI_HUMAN	3 (3)	116.24	0.00135	10.9	Complement factor I OS=Homo sapiens GN=CFI PE=1 SV=2	5770000	2380000	529000	10.9074	4.49905	10.9074	1.03772	2.86967
CH10_HUMAN	9 (8)	426.27	0.000164	2	10 kDa heat shock protein, mitochondrial OS=Homo sapiens GN=HSPE1 PE=1 SV=2	92100000	105000000	184000000	0.500543	0.570652	0.500543	-0.300558	3.78516
CH60_HUMAN	26 (21)	1723.72	0.000487	1.81	60 kDa heat shock protein, mitochondrial OS=Homo sapiens GN=HSPD1 PE=1 SV=2	245000000	226000000	409000000	0.599022	0.552567	0.552567	-0.257615	3.31247
CHD4_HUMAN	3 (2)	79.37	0.00267	1.75	Chromodomain-helicase-DNA-binding protein 4 OS=Homo sapiens GN=CHD4 PE=1 SV=2	1470000	1500000	860000	1.7093	1.74419	1.74419	0.241593	2.57349
CHM2B_HUMAN	1 (1)	22.07	0.00137	7.18	Charged multivesicular body protein 2b OS=Homo sapiens GN=CHMP2B PE=1 SV=1	1490000	685000	207000	7.19807	3.30918	7.19807	0.857216	2.86328
CHRD1_HUMAN	1 (1)	17.26	0.00523	24.91	Cysteine and histidine-rich domain-containing protein 1 OS=Homo sapiens GN=CHORDC1 PE=1 SV=2	1430000	4040000	162000	8.82716	24.9383	24.9383	1.39687	2.2815
CISD2_HUMAN	3 (2)	93.3	0.02	2.97	CDGSH iron-sulfur domain-containing protein 2 OS=Homo sapiens GN=CISD2 PE=1 SV=1	4010000	2600000	1350000	2.97037	1.92593	2.97037	0.472811	1.69897
CISY_HUMAN	7 (7)	275.85	0.00106	2.08	Citrate synthase, mitochondrial OS=Homo sapiens GN=CS PE=1 SV=2	26800000	55700000	44200000	0.606335	1.26018	0.606335	-0.217287	2.97469
CK054_HUMAN	2 (2)	65.97	2.84e-06	16.82	Ester hydrolase C11orf54 OS=Homo sapiens GN=C11orf54 PE=1 SV=1	2130000	3820000	227000	9.38326	16.8282	16.8282	1.22604	5.54668
CK5P3_HUMAN	2 (2)	53.22	0.02	59.41	CDK5 regulatory subunit-associated protein 3 OS=Homo sapiens GN=CDK5RAP3 PE=1 SV=2	1540000	1460000	26000	59.2308	56.1538	59.2308	1.77255	1.69897
CL029_HUMAN	1 (1)	20.04	1.32e-06	4.05	Uncharacterized protein C12orf29 OS=Homo sapiens GN=C12orf29 PE=1 SV=2	471000	1130000	1910000	0.246597	0.591623	0.246597	-0.608012	5.87943
CLCA1_HUMAN	7 (6)	270.73	3.24e-06	10.67	Calcium-activated chloride channel regulator 1 OS=Homo sapiens GN=CLCA1 PE=1 SV=3	1350000	14400000	3090000	0.436893	4.66019	0.436893	-0.359625	5.48945
CLCB_HUMAN	2 (2)	48.54	0.00737	1.66	Clathrin light chain B OS=Homo sapiens GN=CLTB PE=1 SV=1	5450000	7610000	4590000	1.18736	1.65795	1.65795	0.219572	2.13253
CLD3_HUMAN	2 (2)	92.13	0.00487	13.44	Claudin-3 OS=Homo sapiens GN=CLDN3 PE=1 SV=1	6160000	21200000	1580000	3.89873	13.4177	13.4177	1.12768	2.31247
CLH1_HUMAN	41 (28)	1657.36	4.79e-05	2.22	Clathrin heavy chain 1 OS=Homo sapiens GN=CLTC PE=1 SV=5	113000000	157000000	70500000	1.60284	2.22695	2.22695	0.347711	4.31966
CLIC1_HUMAN	10 (10)	496.33	6.08e-06	4.32	Chloride intracellular channel protein 1 OS=Homo sapiens GN=CLIC1 PE=1 SV=4	70200000	100000000	23100000	3.03896	4.329	4.329	0.636388	5.2161
CLIC5_HUMAN	2 (2)	64.08	0.00171	4.44	Chloride intracellular channel protein 5 OS=Homo sapiens GN=CLIC5 PE=1 SV=3	1330000	5900000	1550000	0.858065	3.80645	3.80645	0.58052	2.767
CLPP_HUMAN	2 (2)	39.84	0.000245	9.29	ATP-dependent Clp protease proteolytic subunit, mitochondrial OS=Homo sapiens GN=CLPP PE=1 SV=1	1930000	7440000	801000	2.40949	9.28839	9.28839	0.96794	3.61083
CLUS_HUMAN	7 (7)	376.16	4.02e-05	2.17	Clusterin OS=Homo sapiens GN=CLU PE=1 SV=1	67100000	36700000	30900000	2.17152	1.1877	2.17152	0.336764	4.39577
CMC1_HUMAN	3 (2)	75	7.45e-05	18.39	Calcium-binding mitochondrial carrier protein Aralar1 OS=Homo sapiens GN=SLC25A12 PE=1 SV=2	1790000	97200	847000	2.11334	0.114758	2.11334	0.32497	4.12784
CNDP2_HUMAN	9 (8)	498.13	2.62e-05	2.02	Cytosolic non-specific dipeptidase OS=Homo sapiens GN=CNDP2 PE=1 SV=2	58400000	64500000	32000000	1.825	2.01562	2.01562	0.30441	4.5817
CNN1_HUMAN	6 (5)	239.2	9.93e-05	4.63	Calponin-1 OS=Homo sapiens GN=CNN1 PE=1 SV=2	11000000	51100000	13100000	0.839695	3.90076	3.90076	0.59115	4.00305
CNN2_HUMAN	4 (2)	164.98	0.00182	7.82	Calponin-2 OS=Homo sapiens GN=CNN2 PE=1 SV=4	6340000	8470000	1080000	5.87037	7.84259	7.84259	0.89446	2.73993
CNN3_HUMAN	8 (7)	271.08	6.51e-07	7.47	Calponin-3 OS=Homo sapiens GN=CNN3 PE=1 SV=1	27700000	33400000	4470000	6.19687	7.47204	7.47204	0.873439	6.18642
CO1A1_HUMAN	4 (3)	170	0.00209	2.49	Collagen alpha-1(I) chain OS=Homo sapiens GN=COL1A1 PE=1 SV=5	13300000	14000000	5650000	2.35398	2.47788	2.47788	0.39408	2.67985
CO1A2_HUMAN	5 (5)	224.45	2.76e-06	4.13	Collagen alpha-2(I) chain OS=Homo sapiens GN=COL1A2 PE=1 SV=7	11300000	7890000	2750000	4.10909	2.86909	4.10909	0.613746	5.55909
CO3A1_HUMAN	4 (4)	201.56	0.000257	20.51	Collagen alpha-1(III) chain OS=Homo sapiens GN=COL3A1 PE=1 SV=4	8270000	8530000	416000	19.8798	20.5048	20.5048	1.31186	3.59007
CO4A2_HUMAN	2 (2)	51.65	0.00139	1.99	Collagen alpha-2(IV) chain OS=Homo sapiens GN=COL4A2 PE=1 SV=4	9880000	9560000	4950000	1.99596	1.93131	1.99596	0.300152	2.85699
CO5_HUMAN	4 (4)	120.46	2.18e-06	6.23	Complement C5 OS=Homo sapiens GN=C5 PE=1 SV=4	5550000	3970000	890000	6.23596	4.46067	6.23596	0.794903	5.66154
CO6A1_HUMAN	8 (8)	265.86	6.74e-06	4.28	Collagen alpha-1(VI) chain OS=Homo sapiens GN=COL6A1 PE=1 SV=3	8820000	29000000	6770000	1.30281	4.2836	4.2836	0.631809	5.17134
CO6A2_HUMAN	6 (6)	144.14	2.07e-05	4.5	Collagen alpha-2(VI) chain OS=Homo sapiens GN=COL6A2 PE=1 SV=4	13300000	20900000	4630000	2.87257	4.51404	4.51404	0.654565	4.68403
CO6A3_HUMAN	37 (34)	1402.56	6.83e-06	4	Collagen alpha-3(VI) chain OS=Homo sapiens GN=COL6A3 PE=1 SV=5	75100000	106000000	26400000	2.8447	4.01515	4.01515	0.603702	5.16558
CO7_HUMAN	2 (1)	85.14	0.0078	857.69	Complement component C7 OS=Homo sapiens GN=C7 PE=1 SV=2	534000	569000	662.95	805.491	858.285	858.285	2.93363	2.10791
CO8A_HUMAN	4 (4)	119.04	0.000298	22.17	Complement component C8 alpha chain OS=Homo sapiens GN=C8A PE=1 SV=2	5300000	1650000	239000	22.1757	6.90377	22.1757	1.34588	3.52578
CO8B_HUMAN	4 (4)	134.21	0.000147	15.38	Complement component C8 beta chain OS=Homo sapiens GN=C8B PE=1 SV=3	6300000	1610000	410000	15.3659	3.92683	15.3659	1.18656	3.83268
CO8G_HUMAN	1 (1)	16.55	0.00733	13.16	Complement component C8 gamma chain OS=Homo sapiens GN=C8G PE=1 SV=3	2200000	319000	167000	13.1737	1.91018	13.1737	1.11971	2.1349
CO9_HUMAN	8 (6)	295.36	0.00562	1.88	Complement component C9 OS=Homo sapiens GN=C9 PE=1 SV=2	36800000	25900000	19600000	1.87755	1.32143	1.87755	0.273592	2.25026
COASY_HUMAN	1 (1)	71.43	0.00856	279.22	Bifunctional coenzyme A synthase OS=Homo sapiens GN=COASY PE=1 SV=4	595000	518000	2129.4	279.421	243.261	279.421	2.44626	2.06753
COBL_HUMAN	1 (1)	13.33	4.65e-05	53.32	Protein cordon-bleu OS=Homo sapiens GN=COBL PE=1 SV=2	171000	1730000	9120000	0.01875	0.189693	0.01875	-1.727	4.33255
COCA1_HUMAN	64 (55)	3014.34	1.44e-07	8.96	Collagen alpha-1(XII) chain OS=Homo sapiens GN=COL12A1 PE=1 SV=2	503000000	440000000	56100000	8.96613	7.84314	8.96613	0.952605	6.84164
COEA1_HUMAN	28 (23)	1093.65	4.94e-08	5.34	Collagen alpha-1(XIV) chain OS=Homo sapiens GN=COL14A1 PE=1 SV=3	45600000	149000000	27900000	1.63441	5.3405	5.3405	0.727582	7.30627
COF1_HUMAN	11 (7)	703.3	1.67e-05	2.39	Cofilin-1 OS=Homo sapiens GN=CFL1 PE=1 SV=3	178000000	351000000	147000000	1.21088	2.38776	2.38776	0.37799	4.77728
COIA1_HUMAN	7 (7)	268.44	0.00364	1.54	Collagen alpha-1(XVIII) chain OS=Homo sapiens GN=COL18A1 PE=1 SV=5	12400000	17000000	11100000	1.11712	1.53153	1.53153	0.185126	2.4389
COMT_HUMAN	4 (3)	131.22	0.000914	5.68	Catechol O-methyltransferase OS=Homo sapiens GN=COMT PE=1 SV=2	9580000	5610000	1690000	5.66864	3.31953	5.66864	0.753479	3.03905
COPA_HUMAN	16 (15)	535.75	0.00435	1.75	Coatomer subunit alpha OS=Homo sapiens GN=COPA PE=1 SV=2	40100000	50600000	28900000	1.38754	1.75087	1.75087	0.243253	2.36151
COPB_HUMAN	9 (9)	283.09	3.48e-05	2.39	Coatomer subunit beta OS=Homo sapiens GN=COPB1 PE=1 SV=3	16600000	23400000	9790000	1.69561	2.39019	2.39019	0.378433	4.45842
COPB2_HUMAN	5 (4)	113.24	0.00211	1.92	Coatomer subunit beta' OS=Homo sapiens GN=COPB2 PE=1 SV=2	9650000	13900000	7240000	1.33287	1.91989	1.91989	0.283276	2.67572
COPD_HUMAN	4 (4)	184.93	0.00034	3.72	Coatomer subunit delta OS=Homo sapiens GN=ARCN1 PE=1 SV=1	9380000	13200000	3550000	2.64225	3.71831	3.71831	0.570346	3.46852
COPE_HUMAN	2 (2)	61.69	6.48e-05	3.96	Coatomer subunit epsilon OS=Homo sapiens GN=COPE PE=1 SV=3	2800000	3460000	874000	3.20366	3.95881	3.95881	0.597565	4.18842
COPZ1_HUMAN	2 (2)	62.29	0.00691	6.61	Coatomer subunit zeta-1 OS=Homo sapiens GN=COPZ1 PE=1 SV=1	35600000	5390000	11300000	3.15044	0.476991	3.15044	0.498372	2.16052
COR1B_HUMAN	7 (5)	179.49	0.00659	1.99	Coronin-1B OS=Homo sapiens GN=CORO1B PE=1 SV=1	9730000	13200000	6630000	1.46757	1.99095	1.99095	0.29906	2.18111
COTL1_HUMAN	2 (2)	42.53	0.00228	1.87	Coactosin-like protein OS=Homo sapiens GN=COTL1 PE=1 SV=3	6640000	12200000	6520000	1.0184	1.87117	1.87117	0.272112	2.64207
COX41_HUMAN	4 (4)	188.24	0.00178	1.66	Cytochrome c oxidase subunit 4 isoform 1, mitochondrial OS=Homo sapiens GN=COX4I1 PE=1 SV=1	37600000	59400000	35900000	1.04735	1.6546	1.6546	0.218692	2.74958
COX5A_HUMAN	4 (3)	152.25	0.00201	2.37	Cytochrome c oxidase subunit 5A, mitochondrial OS=Homo sapiens GN=COX5A PE=1 SV=2	31600000	52600000	22200000	1.42342	2.36937	2.36937	0.374633	2.6968
COX5B_HUMAN	4 (4)	111.2	0.00226	1.83	Cytochrome c oxidase subunit 5B, mitochondrial OS=Homo sapiens GN=COX5B PE=1 SV=2	21200000	33900000	38800000	0.546392	0.873711	0.546392	-0.262496	2.64589
COX6C_HUMAN	3 (3)	92.13	0.000245	1.68	Cytochrome c oxidase subunit 6C OS=Homo sapiens GN=COX6C PE=1 SV=2	13400000	12900000	21600000	0.62037	0.597222	0.597222	-0.223864	3.61083
COX7C_HUMAN	1 (1)	31.59	0.02	3.15	Cytochrome c oxidase subunit 7C, mitochondrial OS=Homo sapiens GN=COX7C PE=1 SV=1	11200000	9140000	3570000	3.13725	2.56022	3.13725	0.49655	1.69897
COX7R_HUMAN	1 (1)	41.37	0.000969	2.87	Cytochrome c oxidase subunit 7A-related protein, mitochondrial OS=Homo sapiens GN=COX7A2L PE=1 SV=2	1140000	1360000	474000	2.40506	2.8692	2.8692	0.457761	3.01368
CPNE3_HUMAN	7 (6)	246.61	5.84e-07	4.32	Copine-3 OS=Homo sapiens GN=CPNE3 PE=1 SV=1	53500000	139000000	32200000	1.66149	4.31677	4.31677	0.635159	6.23359
CPNS1_HUMAN	5 (4)	246.99	3.6e-05	3.26	Calpain small subunit 1 OS=Homo sapiens GN=CAPNS1 PE=1 SV=1	30300000	50700000	15500000	1.95484	3.27097	3.27097	0.514676	4.4437
CPSF5_HUMAN	2 (1)	69.37	0.00228	10.09	Cleavage and polyadenylation specificity factor subunit 5 OS=Homo sapiens GN=NUDT21 PE=1 SV=1	1200000	119000	130000	9.23077	0.915385	9.23077	0.965238	2.64207
CPT1A_HUMAN	3 (3)	127.43	3.47e-05	11.05	Carnitine O-palmitoyltransferase 1, liver isoform OS=Homo sapiens GN=CPT1A PE=1 SV=2	2410000	4130000	373000	6.46113	11.0724	11.0724	1.04424	4.45967
CRIP2_HUMAN	4 (4)	119.4	0.00263	2.23	Cysteine-rich protein 2 OS=Homo sapiens GN=CRIP2 PE=1 SV=1	23500000	21300000	10500000	2.2381	2.02857	2.2381	0.349879	2.58004
CRKL_HUMAN	1 (1)	39.7	0.000287	2.9	Crk-like protein OS=Homo sapiens GN=CRKL PE=1 SV=1	2460000	1950000	5650000	0.435398	0.345133	0.345133	-0.462014	3.54212
CRYL1_HUMAN	1 (1)	17.8	0.01	13.25	Lambda-crystallin homolog OS=Homo sapiens GN=CRYL1 PE=1 SV=3	56300	323000	24300	2.31687	13.2922	13.2922	1.1236	2
CS043_HUMAN	1 (1)	20.23	0.00906	9.75	Uncharacterized protein C19orf43 OS=Homo sapiens GN=C19orf43 PE=1 SV=1	1410000	279000	145000	9.72414	1.92414	9.72414	0.987851	2.04287
CSF1_HUMAN	1 (1)	23.24	2.75e-05	3.85	Macrophage colony-stimulating factor 1 OS=Homo sapiens GN=CSF1 PE=1 SV=2	9330000	2950000	11400000	0.818421	0.258772	0.258772	-0.587083	4.56067
CSK_HUMAN	2 (2)	69.93	3.33e-07	26.77	Tyrosine-protein kinase CSK OS=Homo sapiens GN=CSK PE=1 SV=1	765000	1030000	38500	19.8701	26.7532	26.7532	1.42738	6.47756
CSK21_HUMAN	3 (2)	58.19	2.55e-05	2.47	Casein kinase II subunit alpha OS=Homo sapiens GN=CSNK2A1 PE=1 SV=1	3130000	3640000	7740000	0.404393	0.470284	0.404393	-0.393197	4.59346
CSK2B_HUMAN	1 (1)	60.89	1.94e-05	8.94	Casein kinase II subunit beta OS=Homo sapiens GN=CSNK2B PE=1 SV=1	2530000	2620000	293000	8.63481	8.94198	8.94198	0.951434	4.7122
CSN1_HUMAN	3 (3)	131.18	0.00336	3.15	COP9 signalosome complex subunit 1 OS=Homo sapiens GN=GPS1 PE=1 SV=4	1810000	2560000	813000	2.22632	3.14883	3.14883	0.498149	2.47366
CSN4_HUMAN	2 (2)	93.6	0.00449	5.19	COP9 signalosome complex subunit 4 OS=Homo sapiens GN=COPS4 PE=1 SV=1	2740000	5300000	1020000	2.68627	5.19608	5.19608	0.715676	2.34775
CSN5_HUMAN	1 (1)	17.22	0.00372	2.34	COP9 signalosome complex subunit 5 OS=Homo sapiens GN=COPS5 PE=1 SV=4	1490000	1380000	637000	2.33909	2.16641	2.33909	0.369047	2.42946
CSRP1_HUMAN	8 (8)	317.73	2.94e-05	1.68	Cysteine and glycine-rich protein 1 OS=Homo sapiens GN=CSRP1 PE=1 SV=3	51700000	85200000	86900000	0.594937	0.980437	0.594937	-0.225529	4.53165
CSTN1_HUMAN	1 (1)	17.25	0.02	386.63	Calsyntenin-1 OS=Homo sapiens GN=CLSTN1 PE=1 SV=1	275000	956000	2473.72	111.169	386.462	386.462	2.58711	1.69897
CTBP1_HUMAN	6 (3)	174.91	0.00356	2.33	C-terminal-binding protein 1 OS=Homo sapiens GN=CTBP1 PE=1 SV=2	3360000	5020000	2150000	1.56279	2.33488	2.33488	0.368265	2.44855
CTHR1_HUMAN	1 (1)	56.83	0.000395	6.43	Collagen triple helix repeat-containing protein 1 OS=Homo sapiens GN=CTHRC1 PE=1 SV=1	2580000	1980000	401000	6.43392	4.93766	6.43392	0.808475	3.4034
CTL2_HUMAN	3 (3)	95.4	0.02	1.9	Choline transporter-like protein 2 OS=Homo sapiens GN=SLC44A2 PE=1 SV=3	6910000	11300000	5920000	1.16723	1.90878	1.90878	0.280757	1.69897
CTNA1_HUMAN	11 (7)	458.67	6.87e-08	2.87	Catenin alpha-1 OS=Homo sapiens GN=CTNNA1 PE=1 SV=1	21100000	18300000	7340000	2.87466	2.49319	2.87466	0.458586	7.16304
CTNB1_HUMAN	8 (6)	292.12	4.72e-07	3.55	Catenin beta-1 OS=Homo sapiens GN=CTNNB1 PE=1 SV=1	9710000	7360000	2730000	3.55678	2.69597	3.55678	0.551057	6.32606
CTND1_HUMAN	8 (7)	205.44	0.000166	5.96	Catenin delta-1 OS=Homo sapiens GN=CTNND1 PE=1 SV=1	14600000	22100000	3710000	3.93531	5.95687	5.95687	0.775018	3.77989
CUL4B_HUMAN	2 (2)	49.31	0.00472	5.2	Cullin-4B OS=Homo sapiens GN=CUL4B PE=1 SV=4	490000	2550000	1010000	0.485149	2.52475	0.485149	-0.314125	2.32606
CWC15_HUMAN	1 (1)	15.73	0.00195	19.26	Spliceosome-associated protein CWC15 homolog OS=Homo sapiens GN=CWC15 PE=1 SV=2	908000	336000	47200	19.2373	7.11864	19.2373	1.28414	2.70997
CX7A2_HUMAN	2 (2)	123.58	0.00084	2.72	Cytochrome c oxidase subunit 7A2, mitochondrial OS=Homo sapiens GN=COX7A2 PE=1 SV=1	17400000	26300000	9690000	1.79567	2.71414	2.71414	0.433632	3.07572
CXA1_HUMAN	1 (1)	19.16	5.99e-05	7.96	Gap junction alpha-1 protein OS=Homo sapiens GN=GJA1 PE=1 SV=2	536000	800000	4260000	0.125822	0.187793	0.125822	-0.900245	4.22257
CY1_HUMAN	5 (5)	167.43	3.85e-05	1.67	Cytochrome c1, heme protein, mitochondrial OS=Homo sapiens GN=CYC1 PE=1 SV=3	30200000	28200000	18000000	1.67778	1.56667	1.67778	0.224734	4.41454
CYBR1_HUMAN	1 (1)	19.87	0.02	1.54	Cytochrome b reductase 1 OS=Homo sapiens GN=CYBRD1 PE=1 SV=1	996000	1530000	1520000	0.655263	1.00658	0.655263	-0.183584	1.69897
CYC_HUMAN	6 (6)	268.5	0.000778	1.91	Cytochrome c OS=Homo sapiens GN=CYCS PE=1 SV=2	44800000	66300000	34700000	1.29107	1.91066	1.91066	0.281184	3.10902
CYFP1_HUMAN	3 (2)	106.88	2.84e-05	13.31	Cytoplasmic FMR1-interacting protein 1 OS=Homo sapiens GN=CYFIP1 PE=1 SV=1	3770000	2210000	283000	13.3216	7.80919	13.3216	1.12455	4.54668
CYTB_HUMAN	2 (2)	80.95	0.00394	11.84	Cystatin-B OS=Homo sapiens GN=CSTB PE=1 SV=2	1340000	15800000	3240000	0.41358	4.87654	0.41358	-0.38344	2.4045
DAF_HUMAN	8 (8)	313.7	9.27e-07	6.49	Complement decay-accelerating factor OS=Homo sapiens GN=CD55 PE=1 SV=4	21000000	83300000	12800000	1.64062	6.50781	6.50781	0.813435	6.03292
DAG1_HUMAN	1 (1)	34.58	0.00451	755.43	Dystroglycan OS=Homo sapiens GN=DAG1 PE=1 SV=2	521000	644000	852.46	611.172	755.461	755.461	2.87821	2.34582
DBLOH_HUMAN	3 (2)	143.98	8.15e-06	16.23	Diablo homolog, mitochondrial OS=Homo sapiens GN=DIABLO PE=1 SV=1	183000	2980000	2310000	0.0792208	1.29004	0.0792208	-1.10116	5.08884
DBNL_HUMAN	7 (6)	271.89	8.71e-05	7.35	Drebrin-like protein OS=Homo sapiens GN=DBNL PE=1 SV=1	8410000	9140000	1240000	6.78226	7.37097	7.37097	0.867525	4.05998
DC1I2_HUMAN	4 (4)	155.09	0.000365	3.62	Cytoplasmic dynein 1 intermediate chain 2 OS=Homo sapiens GN=DYNC1I2 PE=1 SV=3	7030000	3910000	1940000	3.62371	2.01546	3.62371	0.559154	3.43771
DC1L1_HUMAN	1 (1)	16.9	0.00711	4.15	Cytoplasmic dynein 1 light intermediate chain 1 OS=Homo sapiens GN=DYNC1LI1 PE=1 SV=3	1250000	322000	302000	4.13907	1.06623	4.13907	0.616903	2.14813
DC1L2_HUMAN	3 (2)	67.25	0.00311	1696.57	Cytoplasmic dynein 1 light intermediate chain 2 OS=Homo sapiens GN=DYNC1LI2 PE=1 SV=1	515000	1010000	596.97	862.69	1691.88	1691.88	3.22837	2.50724
DCTN1_HUMAN	5 (5)	226.8	1.16e-05	2.75	Dynactin subunit 1 OS=Homo sapiens GN=DCTN1 PE=1 SV=3	6020000	4870000	2190000	2.74886	2.22374	2.74886	0.439152	4.93554
DCTN2_HUMAN	3 (2)	79.78	0.000241	6.2	Dynactin subunit 2 OS=Homo sapiens GN=DCTN2 PE=1 SV=4	1950000	4200000	678000	2.87611	6.19469	6.19469	0.79202	3.61798
DCTP1_HUMAN	2 (2)	130.08	0.00159	11.52	dCTP pyrophosphatase 1 OS=Homo sapiens GN=DCTPP1 PE=1 SV=1	4380000	1540000	381000	11.4961	4.04199	11.4961	1.06055	2.7986
DDAH2_HUMAN	6 (6)	176.09	9.56e-08	4.2	N(G),N(G)-dimethylarginine dimethylaminohydrolase 2 OS=Homo sapiens GN=DDAH2 PE=1 SV=1	13600000	27100000	6450000	2.10853	4.20155	4.20155	0.62341	7.01954
DDB1_HUMAN	9 (9)	245.72	0.000685	2.11	DNA damage-binding protein 1 OS=Homo sapiens GN=DDB1 PE=1 SV=1	13000000	11300000	6170000	2.10697	1.83144	2.10697	0.323658	3.16431
DDTL_HUMAN	2 (1)	73.03	0.01	1112.62	D-dopachrome decarboxylase-like protein OS=Homo sapiens GN=DDTL PE=2 SV=1	252000	3400000	3055.17	82.4831	1112.87	1112.87	3.04644	2
DDX18_HUMAN	2 (2)	47.56	0.0033	9.33	ATP-dependent RNA helicase DDX18 OS=Homo sapiens GN=DDX18 PE=1 SV=2	2140000	1180000	229000	9.34498	5.15284	9.34498	0.970578	2.48149
DDX20_HUMAN	1 (1)	19.19	0.01	2.42	Probable ATP-dependent RNA helicase DDX20 OS=Homo sapiens GN=DDX20 PE=1 SV=2	4600000	2130000	1900000	2.42105	1.12105	2.42105	0.384004	2
DDX21_HUMAN	3 (1)	80.24	0.01	16.9	Nucleolar RNA helicase 2 OS=Homo sapiens GN=DDX21 PE=1 SV=5	480000	255000	28400	16.9014	8.97887	16.9014	1.22792	2
DDX23_HUMAN	1 (1)	34.39	0.000546	22.2	Probable ATP-dependent RNA helicase DDX23 OS=Homo sapiens GN=DDX23 PE=1 SV=3	830000	295000	37400	22.1925	7.8877	22.1925	1.34621	3.26281
DDX3X_HUMAN	13 (3)	491.76	0.000371	4.64	ATP-dependent RNA helicase DDX3X OS=Homo sapiens GN=DDX3X PE=1 SV=3	3500000	756000	2880000	1.21528	0.2625	0.2625	-0.580871	3.43063
DDX42_HUMAN	2 (2)	44.86	0.000472	9.75	ATP-dependent RNA helicase DDX42 OS=Homo sapiens GN=DDX42 PE=1 SV=1	1680000	969000	172000	9.76744	5.63372	9.76744	0.989781	3.32606
DDX5_HUMAN	14 (5)	673.78	0.0018	1.53	Probable ATP-dependent RNA helicase DDX5 OS=Homo sapiens GN=DDX5 PE=1 SV=1	15900000	16100000	10500000	1.51429	1.53333	1.53333	0.185637	2.74473
DDX58_HUMAN	4 (4)	164.18	2.73e-05	10.26	Probable ATP-dependent RNA helicase DDX58 OS=Homo sapiens GN=DDX58 PE=1 SV=2	4500000	1710000	439000	10.2506	3.89522	10.2506	1.01075	4.56384
DDX6_HUMAN	4 (4)	139.59	0.000117	3.08	Probable ATP-dependent RNA helicase DDX6 OS=Homo sapiens GN=DDX6 PE=1 SV=2	3980000	6530000	2120000	1.87736	3.08019	3.08019	0.488577	3.93181
DECR_HUMAN	9 (9)	329.38	0.01	1.79	2,4-dienoyl-CoA reductase, mitochondrial OS=Homo sapiens GN=DECR1 PE=1 SV=1	23900000	20100000	13400000	1.78358	1.5	1.78358	0.251293	2
DEK_HUMAN	4 (2)	143.09	0.02	2.52	Protein DEK OS=Homo sapiens GN=DEK PE=1 SV=1	12200000	8690000	4830000	2.52588	1.79917	2.52588	0.402413	1.69897
DESM_HUMAN	14 (3)	567.1	0.00327	8.3	Desmin OS=Homo sapiens GN=DES PE=1 SV=3	951000	923000	7670000	0.12399	0.120339	0.120339	-0.919594	2.48545
DESP_HUMAN	4 (3)	113.65	0.00716	3.91	Desmoplakin OS=Homo sapiens GN=DSP PE=1 SV=3	2580000	3410000	872000	2.95872	3.91055	3.91055	0.592238	2.14509
DEST_HUMAN	5 (4)	215.65	7.54e-06	3.89	Destrin OS=Homo sapiens GN=DSTN PE=1 SV=3	11800000	24100000	6190000	1.9063	3.89338	3.89338	0.590326	5.12263
DHE3_HUMAN	9 (5)	372.7	1.44e-05	8.84	Glutamate dehydrogenase 1, mitochondrial OS=Homo sapiens GN=GLUD1 PE=1 SV=2	19200000	25500000	2880000	6.66667	8.85417	8.85417	0.947148	4.84164
DHPR_HUMAN	2 (2)	71.18	0.00032	6.72	Dihydropteridine reductase OS=Homo sapiens GN=QDPR PE=1 SV=2	7140000	5280000	1060000	6.73585	4.98113	6.73585	0.828392	3.49485
DHSO_HUMAN	5 (5)	165.16	0.00246	3.12	Sorbitol dehydrogenase OS=Homo sapiens GN=SORD PE=1 SV=4	6010000	9690000	18700000	0.32139	0.518182	0.32139	-0.492967	2.60906
DIAP1_HUMAN	3 (2)	56.36	4.69e-05	28.33	Protein diaphanous homolog 1 OS=Homo sapiens GN=DIAPH1 PE=1 SV=2	2300000	5390000	190000	12.1053	28.3684	28.3684	1.45284	4.32883
DKC1_HUMAN	2 (2)	59.3	0.000225	3.08	H/ACA ribonucleoprotein complex subunit 4 OS=Homo sapiens GN=DKC1 PE=1 SV=3	2910000	3490000	1130000	2.57522	3.0885	3.0885	0.489747	3.64782
DLG1_HUMAN	1 (1)	29.63	0.0012	7.35	Disks large homolog 1 OS=Homo sapiens GN=DLG1 PE=1 SV=2	464000	770000	105000	4.41905	7.33333	7.33333	0.865301	2.92082
DLGP4_HUMAN	1 (1)	48.97	0.02	107.4	Disks large-associated protein 4 OS=Homo sapiens GN=DLGAP4 PE=1 SV=3	321000	699000	6504.19	49.3528	107.469	107.469	2.03128	1.69897
DLRB1_HUMAN	1 (1)	45.64	0.00553	116.61	Dynein light chain roadblock-type 1 OS=Homo sapiens GN=DYNLRB1 PE=1 SV=3	42800	4990000	315000	0.135873	15.8413	0.135873	-0.866867	2.25727
DNJB1_HUMAN	3 (2)	88.83	0.01	1.88	DnaJ homolog subfamily B member 1 OS=Homo sapiens GN=DNAJB1 PE=1 SV=4	2260000	3160000	1680000	1.34524	1.88095	1.88095	0.274378	2
DNJC8_HUMAN	2 (2)	62.57	0.00468	9.08	DnaJ homolog subfamily C member 8 OS=Homo sapiens GN=DNAJC8 PE=1 SV=2	3180000	4050000	447000	7.11409	9.0604	9.0604	0.957148	2.32975
DNM1L_HUMAN	8 (8)	248.36	0.000903	1.65	Dynamin-1-like protein OS=Homo sapiens GN=DNM1L PE=1 SV=2	12200000	9620000	7380000	1.65312	1.30352	1.65312	0.218303	3.04431
DNPEP_HUMAN	2 (2)	106.36	0.000471	39.89	Aspartyl aminopeptidase OS=Homo sapiens GN=DNPEP PE=1 SV=1	3180000	1550000	79800	39.8496	19.4236	39.8496	1.60042	3.32698
DOPD_HUMAN	4 (2)	114.14	4.28e-05	17.98	D-dopachrome decarboxylase OS=Homo sapiens GN=DDT PE=1 SV=3	1880000	28800000	1600000	1.175	18	18	1.25527	4.36856
DOT1L_HUMAN	1 (1)	14.86	0.000693	2.22	Histone-lysine N-methyltransferase, H3 lysine-79 specific OS=Homo sapiens GN=DOT1L PE=1 SV=2	4080000	1830000	2580000	1.5814	0.709302	1.5814	0.19904	3.15927
DPEP1_HUMAN	1 (1)	23.16	0.000126	7.08	Dipeptidase 1 OS=Homo sapiens GN=DPEP1 PE=1 SV=3	440000	263000	1860000	0.236559	0.141398	0.141398	-0.849557	3.89963
DPM1_HUMAN	1 (1)	25.4	0.000212	9.2	Dolichol-phosphate mannosyltransferase subunit 1 OS=Homo sapiens GN=DPM1 PE=1 SV=1	2990000	3560000	387000	7.7261	9.19897	9.19897	0.963739	3.67366
DPP2_HUMAN	4 (4)	114.67	0.000939	3.31	Dipeptidyl peptidase 2 OS=Homo sapiens GN=DPP7 PE=1 SV=3	4890000	7830000	2370000	2.06329	3.3038	3.3038	0.519013	3.02733
DPP3_HUMAN	5 (5)	163.38	0.0024	1.97	Dipeptidyl peptidase 3 OS=Homo sapiens GN=DPP3 PE=1 SV=2	10600000	12100000	6140000	1.72638	1.97068	1.97068	0.294617	2.61979
DPP4_HUMAN	1 (1)	31.5	0.00387	3.69	Dipeptidyl peptidase 4 OS=Homo sapiens GN=DPP4 PE=1 SV=2	533000	646000	175000	3.04571	3.69143	3.69143	0.567194	2.41229
DPYL2_HUMAN	16 (11)	709.42	7.56e-07	5.23	Dihydropyrimidinase-related protein 2 OS=Homo sapiens GN=DPYSL2 PE=1 SV=1	44100000	63100000	12100000	3.64463	5.21488	5.21488	0.717244	6.12148
DPYL3_HUMAN	16 (13)	769.61	1.64e-05	3.86	Dihydropyrimidinase-related protein 3 OS=Homo sapiens GN=DPYSL3 PE=1 SV=1	197000000	151000000	51000000	3.86275	2.96078	3.86275	0.586896	4.78516
DRA_HUMAN	2 (2)	49.12	0.00598	4.31	HLA class II histocompatibility antigen, DR alpha chain OS=Homo sapiens GN=HLA-DRA PE=1 SV=1	7840000	5780000	1820000	4.30769	3.17582	4.30769	0.634245	2.2233
DSG2_HUMAN	1 (1)	49.71	0.00548	2928.41	Desmoglein-2 OS=Homo sapiens GN=DSG2 PE=1 SV=2	946000	438000	322.89	2929.79	1356.5	2929.79	3.46684	2.26122
DSRAD_HUMAN	7 (6)	167.26	0.01	2.34	Double-stranded RNA-specific adenosine deaminase OS=Homo sapiens GN=ADAR PE=1 SV=4	9500000	8790000	4070000	2.33415	2.15971	2.33415	0.368129	2
DTX3L_HUMAN	2 (2)	37.24	6.55e-06	45.56	E3 ubiquitin-protein ligase DTX3L OS=Homo sapiens GN=DTX3L PE=1 SV=1	2190000	757000	48200	45.4357	15.7054	45.4357	1.6574	5.18376
DX39B_HUMAN	12 (4)	559.17	0.02	4.87	Spliceosome RNA helicase DDX39B OS=Homo sapiens GN=DDX39B PE=1 SV=1	10000000	19900000	4070000	2.457	4.88943	4.88943	0.689259	1.69897
DYHC1_HUMAN	46 (40)	1374.33	1.41e-06	3.68	Cytoplasmic dynein 1 heavy chain 1 OS=Homo sapiens GN=DYNC1H1 PE=1 SV=5	216000000	127000000	58600000	3.68601	2.16724	3.68601	0.566556	5.85078
DYL2_HUMAN	2 (1)	33.56	0.000322	12.19	Dynein light chain 2, cytoplasmic OS=Homo sapiens GN=DYNLL2 PE=1 SV=1	2300000	4210000	345000	6.66667	12.2029	12.2029	1.08646	3.49214
DYN2_HUMAN	5 (3)	177.87	0.000469	2.87	Dynamin-2 OS=Homo sapiens GN=DNM2 PE=1 SV=2	1970000	4100000	5650000	0.348673	0.725664	0.348673	-0.457582	3.32883
DYN3_HUMAN	3 (1)	72.72	0.01	13.69	Dynamin-3 OS=Homo sapiens GN=DNM3 PE=1 SV=4	122000	1240000	1670000	0.0730539	0.742515	0.0730539	-1.13636	2
ECH1_HUMAN	8 (6)	307.13	3.41e-07	5.93	Delta(3,5)-Delta(2,4)-dienoyl-CoA isomerase, mitochondrial OS=Homo sapiens GN=ECH1 PE=1 SV=2	43000000	37000000	7260000	5.92287	5.09642	5.92287	0.772532	6.46725
ECHA_HUMAN	16 (14)	764.43	0.0013	1.93	Trifunctional enzyme subunit alpha, mitochondrial OS=Homo sapiens GN=HADHA PE=1 SV=2	63300000	84700000	43800000	1.44521	1.93379	1.93379	0.286409	2.88606
ECHM_HUMAN	6 (6)	320.4	0.00164	1.83	Enoyl-CoA hydratase, mitochondrial OS=Homo sapiens GN=ECHS1 PE=1 SV=4	26900000	39500000	21700000	1.23963	1.82028	1.82028	0.260137	2.78516
ECM1_HUMAN	2 (2)	63.12	0.000704	13.17	Extracellular matrix protein 1 OS=Homo sapiens GN=ECM1 PE=1 SV=2	901000	837000	68400	13.1725	12.2368	13.1725	1.11967	3.15243
EF1A2_HUMAN	6 (2)	264.19	5.49e-05	12.5	Elongation factor 1-alpha 2 OS=Homo sapiens GN=EEF1A2 PE=1 SV=1	2050000	12900000	1030000	1.99029	12.5243	12.5243	1.09775	4.26043
EF1B_HUMAN	5 (4)	232.61	0.01	2.02	Elongation factor 1-beta OS=Homo sapiens GN=EEF1B2 PE=1 SV=3	12400000	16600000	25100000	0.494024	0.661355	0.494024	-0.306252	2
EF2_HUMAN	31 (29)	1580.07	1.02e-05	2.25	Elongation factor 2 OS=Homo sapiens GN=EEF2 PE=1 SV=4	202000000	453000000	267000000	0.756554	1.69663	1.69663	0.229587	4.9914
EFTU_HUMAN	13 (12)	544.21	1.66e-05	2.02	Elongation factor Tu, mitochondrial OS=Homo sapiens GN=TUFM PE=1 SV=2	82900000	67200000	41000000	2.02195	1.63902	2.02195	0.305771	4.77989
EHD1_HUMAN	6 (5)	158.03	3.71e-07	76.69	EH domain-containing protein 1 OS=Homo sapiens GN=EHD1 PE=1 SV=2	32600000	27300000	425000	76.7059	64.2353	76.7059	1.88483	6.43063
EHD4_HUMAN	4 (2)	154.33	0.000789	8.02	EH domain-containing protein 4 OS=Homo sapiens GN=EHD4 PE=1 SV=1	2900000	2880000	362000	8.01105	7.9558	8.01105	0.903689	3.10292
EIF3A_HUMAN	7 (5)	226.49	0.000629	1.68	Eukaryotic translation initiation factor 3 subunit A OS=Homo sapiens GN=EIF3A PE=1 SV=1	8580000	13000000	14400000	0.595833	0.902778	0.595833	-0.224875	3.20135
EIF3B_HUMAN	4 (3)	111.07	0.000129	4.65	Eukaryotic translation initiation factor 3 subunit B OS=Homo sapiens GN=EIF3B PE=1 SV=3	3490000	7690000	1660000	2.10241	4.63253	4.63253	0.665818	3.88941
EIF3D_HUMAN	1 (1)	30.15	0.00153	4.41	Eukaryotic translation initiation factor 3 subunit D OS=Homo sapiens GN=EIF3D PE=1 SV=1	1610000	539000	2380000	0.676471	0.226471	0.226471	-0.644988	2.81531
EIF3F_HUMAN	4 (3)	149.95	0.00604	2.3	Eukaryotic translation initiation factor 3 subunit F OS=Homo sapiens GN=EIF3F PE=1 SV=1	6030000	9230000	4010000	1.50374	2.30175	2.30175	0.362057	2.21896
EIF3G_HUMAN	2 (1)	95.09	5.55e-06	4.92	Eukaryotic translation initiation factor 3 subunit G OS=Homo sapiens GN=EIF3G PE=1 SV=2	1840000	464000	2280000	0.807018	0.203509	0.203509	-0.691417	5.25571
EIF3I_HUMAN	3 (3)	88.6	0.00143	6.22	Eukaryotic translation initiation factor 3 subunit I OS=Homo sapiens GN=EIF3I PE=1 SV=1	5070000	8720000	1400000	3.62143	6.22857	6.22857	0.794388	2.84466
EIF3K_HUMAN	2 (1)	94.38	0.00026	2.1	Eukaryotic translation initiation factor 3 subunit K OS=Homo sapiens GN=EIF3K PE=1 SV=1	4470000	4590000	2180000	2.05046	2.1055	2.1055	0.323356	3.58503
ELOC_HUMAN	2 (2)	65.79	2.22e-06	85.15	Transcription elongation factor B polypeptide 1 OS=Homo sapiens GN=TCEB1 PE=1 SV=1	3210000	5430000	63800	50.3135	85.1097	85.1097	1.92998	5.65365
EMAL4_HUMAN	2 (2)	66.09	0.00181	36.83	Echinoderm microtubule-associated protein-like 4 OS=Homo sapiens GN=EML4 PE=1 SV=3	1520000	2540000	69000	22.029	36.8116	36.8116	1.56598	2.74232
EMC1_HUMAN	2 (2)	116.01	0.01	193.58	ER membrane protein complex subunit 1 OS=Homo sapiens GN=EMC1 PE=1 SV=1	1520000	1350000	7837.12	193.949	172.257	193.949	2.28769	2
EMD_HUMAN	2 (2)	77.92	0.01	2.71	Emerin OS=Homo sapiens GN=EMD PE=1 SV=1	4020000	1740000	1490000	2.69799	1.16779	2.69799	0.43104	2
ENAH_HUMAN	1 (1)	46.45	0.00294	5.74	Protein enabled homolog OS=Homo sapiens GN=ENAH PE=1 SV=2	2190000	1820000	382000	5.73298	4.7644	5.73298	0.758381	2.53165
ENOA_HUMAN	26 (18)	2041.94	7.71e-06	2.63	Alpha-enolase OS=Homo sapiens GN=ENO1 PE=1 SV=2	533000000	1400000000	976000000	0.546107	1.43443	0.546107	-0.262723	5.11295
EPG5_HUMAN	1 (1)	16.58	0.00394	2.33	Ectopic P granules protein 5 homolog OS=Homo sapiens GN=EPG5 PE=2 SV=2	725000	1690000	918000	0.78976	1.84096	1.84096	0.265044	2.4045
EPIPL_HUMAN	30 (21)	983.43	5.34e-06	3.84	Epiplakin OS=Homo sapiens GN=EPPK1 PE=1 SV=2	23200000	86900000	22600000	1.02655	3.84513	3.84513	0.584911	5.27246
EPN4_HUMAN	1 (1)	20.85	0.02	119.2	Clathrin interactor 1 OS=Homo sapiens GN=CLINT1 PE=1 SV=1	2170000	1530000	18200	119.231	84.0659	119.231	2.07639	1.69897
ERF1_HUMAN	2 (2)	71.1	0.00723	3.25	Eukaryotic peptide chain release factor subunit 1 OS=Homo sapiens GN=ETF1 PE=1 SV=3	1690000	4000000	1230000	1.37398	3.25203	3.25203	0.512155	2.14086
ERF3A_HUMAN	2 (2)	67.05	0.01	2.87	Eukaryotic peptide chain release factor GTP-binding subunit ERF3A OS=Homo sapiens GN=GSPT1 PE=1 SV=1	7860000	8750000	3040000	2.58553	2.87829	2.87829	0.459134	2
ERH_HUMAN	1 (1)	71.72	0.000108	2.83	Enhancer of rudimentary homolog OS=Homo sapiens GN=ERH PE=1 SV=1	4420000	10600000	3750000	1.17867	2.82667	2.82667	0.451275	3.96658
ERO1A_HUMAN	8 (7)	337.62	0.000343	3.18	ERO1-like protein alpha OS=Homo sapiens GN=ERO1A PE=1 SV=2	13300000	12400000	4190000	3.17422	2.95943	3.17422	0.501638	3.46471
ES8L2_HUMAN	1 (1)	39.1	0.00286	37.4	Epidermal growth factor receptor kinase substrate 8-like protein 2 OS=Homo sapiens GN=EPS8L2 PE=1 SV=2	139000	5200000	3490000	0.0398281	1.48997	0.0398281	-1.39981	2.54363
EST1A_HUMAN	1 (1)	15.38	0.02	34.12	Telomerase-binding protein EST1A OS=Homo sapiens GN=SMG6 PE=1 SV=2	91900	3140000	611000	0.150409	5.13912	0.150409	-0.822726	1.69897
ESTD_HUMAN	4 (4)	116.36	3.81e-05	3.83	S-formylglutathione hydrolase OS=Homo sapiens GN=ESD PE=1 SV=2	6730000	10800000	2820000	2.38652	3.82979	3.82979	0.583175	4.41908
ESYT1_HUMAN	4 (4)	142.87	0.00165	1.65	Extended synaptotagmin-1 OS=Homo sapiens GN=ESYT1 PE=1 SV=1	8060000	7930000	4880000	1.65164	1.625	1.65164	0.217915	2.78252
ETFA_HUMAN	6 (6)	204.88	0.00129	2.18	Electron transfer flavoprotein subunit alpha, mitochondrial OS=Homo sapiens GN=ETFA PE=1 SV=1	9750000	10400000	4760000	2.04832	2.18487	2.18487	0.339426	2.88941
ETFB_HUMAN	7 (7)	247.44	0.00635	2.12	Electron transfer flavoprotein subunit beta OS=Homo sapiens GN=ETFB PE=1 SV=3	20600000	23100000	10900000	1.88991	2.11927	2.11927	0.326185	2.19723
ETHE1_HUMAN	2 (2)	57.85	0.00034	3.91	Persulfide dioxygenase ETHE1, mitochondrial OS=Homo sapiens GN=ETHE1 PE=1 SV=2	3500000	7960000	2040000	1.71569	3.90196	3.90196	0.591283	3.46852
EVL_HUMAN	1 (1)	30.93	0.000293	7.12	Ena/VASP-like protein OS=Homo sapiens GN=EVL PE=1 SV=2	285000	423000	2030000	0.140394	0.208374	0.140394	-0.852651	3.53313
EWS_HUMAN	3 (2)	91.71	6.51e-07	9.71	RNA-binding protein EWS OS=Homo sapiens GN=EWSR1 PE=1 SV=1	8310000	7170000	856000	9.70794	8.37617	9.70794	0.987127	6.18642
EXOC4_HUMAN	3 (2)	79.64	0.0024	6.09	Exocyst complex component 4 OS=Homo sapiens GN=EXOC4 PE=1 SV=1	6400000	1250000	7610000	0.840999	0.164258	0.164258	-0.784475	2.61979
EZRI_HUMAN	23 (10)	933.88	0.000106	3.55	Ezrin OS=Homo sapiens GN=EZR PE=1 SV=4	21200000	33600000	75200000	0.281915	0.446809	0.281915	-0.549882	3.97469
F120A_HUMAN	4 (3)	163.61	0.00144	5.61	Constitutive coactivator of PPAR-gamma-like protein 1 OS=Homo sapiens GN=FAM120A PE=1 SV=2	3670000	5920000	1050000	3.49524	5.6381	5.6381	0.751132	2.84164
F13A_HUMAN	12 (8)	456.74	0.00486	2.05	Coagulation factor XIII A chain OS=Homo sapiens GN=F13A1 PE=1 SV=4	10700000	17200000	21900000	0.488584	0.785388	0.488584	-0.31106	2.31336
F16P1_HUMAN	2 (2)	46.56	0.00146	3.92	Fructose-1,6-bisphosphatase 1 OS=Homo sapiens GN=FBP1 PE=1 SV=5	1540000	392000	398000	3.86935	0.984925	3.86935	0.587638	2.83565
F16P2_HUMAN	1 (1)	25.66	0.000553	1.98	Fructose-1,6-bisphosphatase isozyme 2 OS=Homo sapiens GN=FBP2 PE=1 SV=2	4530000	7110000	3600000	1.25833	1.975	1.975	0.295567	3.25727
F213A_HUMAN	4 (4)	223.05	2.93e-06	46.92	Redox-regulatory protein FAM213A OS=Homo sapiens GN=FAM213A PE=1 SV=3	656000	1940000	30800000	0.0212987	0.062987	0.0212987	-1.67165	5.53313
FA49B_HUMAN	4 (2)	139.41	0.00146	5.35	Protein FAM49B OS=Homo sapiens GN=FAM49B PE=1 SV=1	5900000	11100000	2080000	2.83654	5.33654	5.33654	0.72726	2.83565
FAAA_HUMAN	3 (3)	125.62	0.02	2.7	Fumarylacetoacetase OS=Homo sapiens GN=FAH PE=1 SV=2	4230000	1710000	1570000	2.69427	1.08917	2.69427	0.430441	1.69897
FABP4_HUMAN	2 (1)	45.75	0.01	1.75	Fatty acid-binding protein, adipocyte OS=Homo sapiens GN=FABP4 PE=1 SV=3	1020000	1780000	1790000	0.569832	0.994413	0.569832	-0.244253	2
FABPL_HUMAN	3 (2)	199.8	1.35e-07	9.64	Fatty acid-binding protein, liver OS=Homo sapiens GN=FABP1 PE=1 SV=1	6040000	32200000	3340000	1.80838	9.64072	9.64072	0.984109	6.86967
FACE1_HUMAN	2 (2)	43.2	0.00846	8.54	CAAX prenyl protease 1 homolog OS=Homo sapiens GN=ZMPSTE24 PE=1 SV=2	1770000	3150000	368000	4.80978	8.55978	8.55978	0.932463	2.07263
FAHD1_HUMAN	1 (1)	45.07	0.01	268.99	Acylpyruvase FAHD1, mitochondrial OS=Homo sapiens GN=FAHD1 PE=1 SV=2	1560000	1990000	7402.41	210.742	268.831	268.831	2.42948	2
FAM3D_HUMAN	1 (1)	23.35	0.02	481.42	Protein FAM3D OS=Homo sapiens GN=FAM3D PE=1 SV=1	27600	2370000	4914.51	5.61602	482.245	482.245	2.68327	1.69897
FAS_HUMAN	13 (13)	356.75	4.51e-05	2.18	Fatty acid synthase OS=Homo sapiens GN=FASN PE=1 SV=3	22800000	30100000	13800000	1.65217	2.18116	2.18116	0.338687	4.34582
FBLN1_HUMAN	12 (12)	624.98	1.68e-05	5.27	Fibulin-1 OS=Homo sapiens GN=FBLN1 PE=1 SV=4	84000000	97500000	18500000	4.54054	5.27027	5.27027	0.721833	4.77469
FBLN2_HUMAN	8 (8)	322.41	2.4e-05	34.63	Fibulin-2 OS=Homo sapiens GN=FBLN2 PE=1 SV=2	10200000	29100000	841000	12.1284	34.6017	34.6017	1.5391	4.61979
FBLN3_HUMAN	8 (7)	313.46	1.72e-06	22.91	EGF-containing fibulin-like extracellular matrix protein 1 OS=Homo sapiens GN=EFEMP1 PE=1 SV=2	15700000	21600000	944000	16.6314	22.8814	22.8814	1.35948	5.76447
FBLN5_HUMAN	6 (5)	184.8	0.000665	5.65	Fibulin-5 OS=Homo sapiens GN=FBLN5 PE=1 SV=1	3010000	7390000	1310000	2.29771	5.64122	5.64122	0.751373	3.17718
FBN1_HUMAN	21 (18)	752.52	0.000112	2.82	Fibrillin-1 OS=Homo sapiens GN=FBN1 PE=1 SV=3	32000000	29500000	11300000	2.83186	2.61062	2.83186	0.452072	3.95078
FBX6_HUMAN	1 (1)	13.54	1.36e-06	16.59	F-box only protein 6 OS=Homo sapiens GN=FBXO6 PE=1 SV=1	1080000	781000	65000	16.6154	12.0154	16.6154	1.22051	5.86646
FCGBP_HUMAN	11 (9)	400.29	3.78e-05	7.04	IgGFc-binding protein OS=Homo sapiens GN=FCGBP PE=1 SV=3	2110000	14800000	3490000	0.604585	4.24069	0.604585	-0.218543	4.42251
FCL_HUMAN	3 (3)	114.06	0.01	1.75	GDP-L-fucose synthase OS=Homo sapiens GN=TSTA3 PE=1 SV=1	6820000	9030000	5160000	1.32171	1.75	1.75	0.243038	2
FEN1_HUMAN	2 (2)	68.54	6.2e-06	9.59	Flap endonuclease 1 OS=Homo sapiens GN=FEN1 PE=1 SV=1	3910000	4030000	421000	9.28741	9.57245	9.57245	0.981023	5.20761
FHIT_HUMAN	1 (1)	29.87	0.000634	4.56	Bis(5'-adenosyl)-triphosphatase OS=Homo sapiens GN=FHIT PE=1 SV=3	1020000	839000	223000	4.57399	3.76233	4.57399	0.660295	3.19791
FHL1_HUMAN	1 (1)	50.49	3.26e-06	74.08	Four and a half LIM domains protein 1 OS=Homo sapiens GN=FHL1 PE=1 SV=4	636000	2770000	37300	17.0509	74.2627	74.2627	1.87077	5.48678
FHL2_HUMAN	3 (3)	111	3.18e-07	8.64	Four and a half LIM domains protein 2 OS=Homo sapiens GN=FHL2 PE=1 SV=3	5640000	5470000	653000	8.63706	8.37672	8.63706	0.936366	6.49757
FHR2_HUMAN	2 (1)	73.12	0.00427	4.04	Complement factor H-related protein 2 OS=Homo sapiens GN=CFHR2 PE=1 SV=1	1120000	1080000	276000	4.05797	3.91304	4.05797	0.608309	2.36957
FIBB_HUMAN	18 (16)	869.25	1.72e-06	3.18	Fibrinogen beta chain OS=Homo sapiens GN=FGB PE=1 SV=2	198000000	215000000	67700000	2.92467	3.17578	3.17578	0.50185	5.76447
FIBG_HUMAN	14 (12)	637.85	0.00025	1.79	Fibrinogen gamma chain OS=Homo sapiens GN=FGG PE=1 SV=3	150000000	140000000	83800000	1.78998	1.67064	1.78998	0.252847	3.60206
FINC_HUMAN	49 (46)	2147.26	2.59e-06	4	Fibronectin OS=Homo sapiens GN=FN1 PE=1 SV=4	416000000	389000000	104000000	4	3.74038	4	0.60206	5.5867
FIP1_HUMAN	1 (1)	63.73	0.00368	1832.14	Pre-mRNA 3'-end-processing factor FIP1 OS=Homo sapiens GN=FIP1L1 PE=1 SV=1	918000	109000	501.19	1831.64	217.482	1831.64	3.26284	2.43415
FKB11_HUMAN	3 (3)	75.94	0.000261	4.31	Peptidyl-prolyl cis-trans isomerase FKBP11 OS=Homo sapiens GN=FKBP11 PE=1 SV=1	3880000	3380000	14600000	0.265753	0.231507	0.231507	-0.635436	3.58336
FKB15_HUMAN	1 (1)	31.53	0.01	23.9	FK506-binding protein 15 OS=Homo sapiens GN=FKBP15 PE=1 SV=2	69100	1650000	382000	0.18089	4.31937	0.18089	-0.742585	2
FKB1A_HUMAN	2 (2)	154.25	8.03e-05	4.3	Peptidyl-prolyl cis-trans isomerase FKBP1A OS=Homo sapiens GN=FKBP1A PE=1 SV=2	37200000	46300000	10800000	3.44444	4.28704	4.28704	0.632157	4.09528
FKBP3_HUMAN	4 (3)	165.22	0.000716	3.49	Peptidyl-prolyl cis-trans isomerase FKBP3 OS=Homo sapiens GN=FKBP3 PE=1 SV=1	13300000	19000000	5430000	2.44936	3.49908	3.49908	0.543954	3.14509
FKBP9_HUMAN	4 (2)	78.09	5.57e-05	3.47	Peptidyl-prolyl cis-trans isomerase FKBP9 OS=Homo sapiens GN=FKBP9 PE=1 SV=2	4210000	7390000	2130000	1.97653	3.46948	3.46948	0.540265	4.25414
FLNA_HUMAN	92 (73)	4528.84	6.86e-08	4.09	Filamin-A OS=Homo sapiens GN=FLNA PE=1 SV=4	691000000	1230000000	301000000	2.29568	4.08638	4.08638	0.611339	7.16368
FLNB_HUMAN	49 (35)	2254.29	9.65e-07	2.75	Filamin-B OS=Homo sapiens GN=FLNB PE=1 SV=2	136000000	196000000	71100000	1.9128	2.75668	2.75668	0.440386	6.01547
FLNC_HUMAN	24 (10)	916.79	3.37e-05	2.6	Filamin-C OS=Homo sapiens GN=FLNC PE=1 SV=3	14200000	17100000	36800000	0.38587	0.464674	0.38587	-0.413559	4.47237
FLOT1_HUMAN	5 (5)	189.66	0.00143	1.93	Flotillin-1 OS=Homo sapiens GN=FLOT1 PE=1 SV=3	8030000	8570000	4440000	1.80856	1.93018	1.93018	0.285598	2.84466
FNBP1_HUMAN	1 (1)	17.97	0.02	3.12	Formin-binding protein 1 OS=Homo sapiens GN=FNBP1 PE=1 SV=2	249000	247000	79900	3.1164	3.09136	3.1164	0.493653	1.69897
FOLR1_HUMAN	4 (4)	199.99	2.29e-06	4.42	Folate receptor alpha OS=Homo sapiens GN=FOLR1 PE=1 SV=3	13000000	42600000	9640000	1.34855	4.41909	4.41909	0.645333	5.64016
FPPS_HUMAN	2 (2)	87.84	0.00161	2.72	Farnesyl pyrophosphate synthase OS=Homo sapiens GN=FDPS PE=1 SV=4	13300000	11800000	4890000	2.71984	2.41309	2.71984	0.434543	2.79317
FPRP_HUMAN	2 (2)	57.67	8.66e-05	3.87	Prostaglandin F2 receptor negative regulator OS=Homo sapiens GN=PTGFRN PE=1 SV=2	5530000	6880000	1780000	3.10674	3.86517	3.86517	0.587168	4.06248
FSCN1_HUMAN	10 (10)	466.85	8.13e-05	2.8	Fascin OS=Homo sapiens GN=FSCN1 PE=1 SV=3	29200000	64900000	23200000	1.25862	2.79741	2.79741	0.446757	4.08991
FUBP1_HUMAN	12 (9)	386.58	1.28e-05	2.8	Far upstream element-binding protein 1 OS=Homo sapiens GN=FUBP1 PE=1 SV=3	35600000	40600000	14500000	2.45517	2.8	2.8	0.447158	4.89279
FUBP3_HUMAN	5 (3)	105.51	0.000546	2.24	Far upstream element-binding protein 3 OS=Homo sapiens GN=FUBP3 PE=1 SV=2	6290000	5140000	11500000	0.546957	0.446957	0.446957	-0.349735	3.26281
FUS_HUMAN	6 (3)	298.34	0.00261	1.61	RNA-binding protein FUS OS=Homo sapiens GN=FUS PE=1 SV=1	17000000	16800000	10600000	1.60377	1.58491	1.60377	0.205143	2.58336
G3BP1_HUMAN	3 (2)	64.13	5.23e-05	6.61	Ras GTPase-activating protein-binding protein 1 OS=Homo sapiens GN=G3BP1 PE=1 SV=1	3940000	6120000	926000	4.25486	6.60907	6.60907	0.82014	4.2815
G3P_HUMAN	16 (12)	1367.46	0.00376	1.54	Glyceraldehyde-3-phosphate dehydrogenase OS=Homo sapiens GN=GAPDH PE=1 SV=3	811000000	1100000000	1250000000	0.6488	0.88	0.6488	-0.187889	2.42481
G6PD_HUMAN	6 (6)	189.03	0.00417	2.1	Glucose-6-phosphate 1-dehydrogenase OS=Homo sapiens GN=G6PD PE=1 SV=4	9420000	18900000	9010000	1.0455	2.09767	2.09767	0.321737	2.37986
G6PE_HUMAN	7 (7)	246.7	0.00142	2.84	GDH/6PGL endoplasmic bifunctional protein OS=Homo sapiens GN=H6PD PE=1 SV=2	7800000	12500000	22100000	0.352941	0.565611	0.352941	-0.452298	2.84771
G6PI_HUMAN	19 (17)	821.61	0.0012	1.61	Glucose-6-phosphate isomerase OS=Homo sapiens GN=GPI PE=1 SV=4	179000000	289000000	270000000	0.662963	1.07037	0.662963	-0.178511	2.92082
GALT_HUMAN	2 (1)	44.73	0.00318	12.53	Galactose-1-phosphate uridylyltransferase OS=Homo sapiens GN=GALT PE=1 SV=3	344000	148000	27500	12.5091	5.38182	12.5091	1.09723	2.49757
GAPR1_HUMAN	3 (3)	165.43	5.63e-07	44.49	Golgi-associated plant pathogenesis-related protein 1 OS=Homo sapiens GN=GLIPR2 PE=1 SV=3	4960000	4970000	112000	44.2857	44.375	44.375	1.64714	6.24949
GBB1_HUMAN	5 (3)	190.65	1.24e-05	5.39	Guanine nucleotide-binding protein G(I)/G(S)/G(T) subunit beta-1 OS=Homo sapiens GN=GNB1 PE=1 SV=3	7520000	7700000	1430000	5.25874	5.38462	5.38462	0.731155	4.90658
GBB2_HUMAN	6 (3)	232.13	0.000709	9.04	Guanine nucleotide-binding protein G(I)/G(S)/G(T) subunit beta-2 OS=Homo sapiens GN=GNB2 PE=1 SV=3	11300000	15600000	1730000	6.53179	9.01734	9.01734	0.955078	3.14935
GBB4_HUMAN	3 (1)	112.93	0.000195	7.31	Guanine nucleotide-binding protein subunit beta-4 OS=Homo sapiens GN=GNB4 PE=1 SV=3	1510000	1230000	207000	7.29469	5.94203	7.29469	0.863007	3.70997
GBG12_HUMAN	4 (4)	181.05	0.00207	2.08	Guanine nucleotide-binding protein G(I)/G(S)/G(O) subunit gamma-12 OS=Homo sapiens GN=GNG12 PE=1 SV=3	12800000	26500000	15400000	0.831169	1.72078	1.72078	0.235725	2.68403
GBLP_HUMAN	15 (12)	650.38	1.87e-06	3.23	Guanine nucleotide-binding protein subunit beta-2-like 1 OS=Homo sapiens GN=GNB2L1 PE=1 SV=3	66900000	110000000	34100000	1.96188	3.22581	3.22581	0.508638	5.72816
GCP60_HUMAN	5 (4)	158.92	0.00253	4.53	Golgi resident protein GCP60 OS=Homo sapiens GN=ACBD3 PE=1 SV=4	4230000	6470000	1430000	2.95804	4.52448	4.52448	0.655568	2.59688
GCSH_HUMAN	2 (2)	65.33	0.000234	39.78	Glycine cleavage system H protein, mitochondrial OS=Homo sapiens GN=GCSH PE=1 SV=2	3300000	2430000	82900	39.807	29.3124	39.807	1.59996	3.63078
GDIA_HUMAN	10 (5)	370.19	5.53e-07	15.02	Rab GDP dissociation inhibitor alpha OS=Homo sapiens GN=GDI1 PE=1 SV=2	14800000	19500000	1300000	11.3846	15	15	1.17609	6.25727
GDIB_HUMAN	20 (13)	738.72	0.00251	1.5	Rab GDP dissociation inhibitor beta OS=Homo sapiens GN=GDI2 PE=1 SV=2	67300000	64100000	44800000	1.50223	1.4308	1.50223	0.176737	2.60033
GDIR1_HUMAN	6 (6)	222.58	3.31e-05	2.14	Rho GDP-dissociation inhibitor 1 OS=Homo sapiens GN=ARHGDIA PE=1 SV=3	45600000	58900000	27500000	1.65818	2.14182	2.14182	0.330783	4.48017
GDIR2_HUMAN	2 (2)	76.16	8.01e-06	3.39	Rho GDP-dissociation inhibitor 2 OS=Homo sapiens GN=ARHGDIB PE=1 SV=3	13200000	15700000	4630000	2.85097	3.39093	3.39093	0.530319	5.09637
GELS_HUMAN	15 (13)	599.21	2.87e-05	2.68	Gelsolin OS=Homo sapiens GN=GSN PE=1 SV=1	138000000	111000000	51400000	2.68482	2.15953	2.68482	0.428916	4.54212
GFPT2_HUMAN	1 (1)	26.08	0.000293	3.46	Glutamine--fructose-6-phosphate aminotransferase [isomerizing] 2 OS=Homo sapiens GN=GFPT2 PE=1 SV=3	1750000	3480000	1010000	1.73267	3.44554	3.44554	0.537258	3.53313
GIMA4_HUMAN	1 (1)	23.63	0.02	2.11	GTPase IMAP family member 4 OS=Homo sapiens GN=GIMAP4 PE=1 SV=1	810000	1710000	1640000	0.493902	1.04268	0.493902	-0.306359	1.69897
GLNA_HUMAN	3 (2)	123.97	2.8e-06	16.05	Glutamine synthetase OS=Homo sapiens GN=GLUL PE=1 SV=4	1580000	4810000	300000	5.26667	16.0333	16.0333	1.20502	5.55284
GLOD4_HUMAN	4 (3)	133.04	0.00597	1.55	Glyoxalase domain-containing protein 4 OS=Homo sapiens GN=GLOD4 PE=1 SV=1	9520000	13600000	8750000	1.088	1.55429	1.55429	0.191531	2.22403
GLP3L_HUMAN	1 (1)	36.57	6.95e-05	20.67	Golgi phosphoprotein 3-like OS=Homo sapiens GN=GOLPH3L PE=1 SV=1	2730000	5870000	284000	9.61268	20.669	20.669	1.31532	4.15802
GLRX3_HUMAN	3 (2)	87.52	0.02	2.86	Glutaredoxin-3 OS=Homo sapiens GN=GLRX3 PE=1 SV=2	2270000	1860000	794000	2.85894	2.34257	2.85894	0.456205	1.69897
GLRX5_HUMAN	1 (1)	35.45	0.01	172.67	Glutaredoxin-related protein 5, mitochondrial OS=Homo sapiens GN=GLRX5 PE=1 SV=2	1820000	2120000	12300	147.967	172.358	172.358	2.23643	2
GLYM_HUMAN	10 (8)	360.86	2.2e-06	4.1	Serine hydroxymethyltransferase, mitochondrial OS=Homo sapiens GN=SHMT2 PE=1 SV=3	16100000	21600000	66200000	0.243202	0.326284	0.243202	-0.614032	5.65758
GMFB_HUMAN	1 (1)	14.92	0.02	176.72	Glia maturation factor beta OS=Homo sapiens GN=GMFB PE=1 SV=2	893000	1870000	10600	84.2453	176.415	176.415	2.24654	1.69897
GMPPA_HUMAN	2 (2)	68.1	0.00103	3.1	Mannose-1-phosphate guanyltransferase alpha OS=Homo sapiens GN=GMPPA PE=1 SV=1	935000	1130000	365000	2.56164	3.09589	3.09589	0.490786	2.98716
GMPR1_HUMAN	2 (1)	44.31	0.000169	5.02	GMP reductase 1 OS=Homo sapiens GN=GMPR PE=1 SV=1	3970000	3490000	791000	5.01896	4.41214	5.01896	0.700614	3.77211
GNAI2_HUMAN	7 (5)	325.3	4.09e-05	3.99	Guanine nucleotide-binding protein G(i) subunit alpha-2 OS=Homo sapiens GN=GNAI2 PE=1 SV=3	20500000	32600000	8170000	2.50918	3.99021	3.99021	0.600996	4.38828
GNAS1_HUMAN	4 (3)	114.54	0.000622	11.39	Guanine nucleotide-binding protein G(s) subunit alpha isoforms XLas OS=Homo sapiens GN=GNAS PE=1 SV=2	3900000	2380000	343000	11.3703	6.93878	11.3703	1.05577	3.20621
GNS_HUMAN	1 (1)	31.17	0.00407	3.03	N-acetylglucosamine-6-sulfatase OS=Homo sapiens GN=GNS PE=1 SV=3	1600000	2870000	4860000	0.329218	0.590535	0.329218	-0.482516	2.39041
GOGA2_HUMAN	4 (2)	93.91	0.000482	3.67	Golgin subfamily A member 2 OS=Homo sapiens GN=GOLGA2 PE=1 SV=3	933000	2570000	700000	1.33286	3.67143	3.67143	0.564835	3.31695
GOLI_HUMAN	1 (1)	20.76	0.02	2.55	E3 ubiquitin-protein ligase RNF130 OS=Homo sapiens GN=RNF130 PE=1 SV=1	547000	481000	1220000	0.448361	0.394262	0.394262	-0.404215	1.69897
GPDM_HUMAN	9 (8)	389.32	0.00019	2.15	Glycerol-3-phosphate dehydrogenase, mitochondrial OS=Homo sapiens GN=GPD2 PE=1 SV=3	58200000	27100000	36200000	1.60773	0.748619	1.60773	0.206214	3.72125
GPX3_HUMAN	4 (3)	106.64	5.86e-06	19.19	Glutathione peroxidase 3 OS=Homo sapiens GN=GPX3 PE=1 SV=2	12500000	8400000	651000	19.2012	12.9032	19.2012	1.28333	5.2321
GPX4_HUMAN	3 (3)	96.93	2.12e-05	4.28	Phospholipid hydroperoxide glutathione peroxidase, mitochondrial OS=Homo sapiens GN=GPX4 PE=1 SV=3	3790000	4540000	1060000	3.57547	4.28302	4.28302	0.63175	4.67366
GREM1_HUMAN	1 (1)	41.66	0.00155	21.19	Gremlin-1 OS=Homo sapiens GN=GREM1 PE=1 SV=1	104000	1170000	55100	1.88748	21.2341	21.2341	1.32703	2.80967
GRHPR_HUMAN	2 (1)	121.97	0.02	128.05	Glyoxylate reductase/hydroxypyruvate reductase OS=Homo sapiens GN=GRHPR PE=1 SV=1	4870000	4020000	38000	128.158	105.789	128.158	2.10775	1.69897
GSH1_HUMAN	1 (1)	27.29	0.01	1.98	Glutamate--cysteine ligase catalytic subunit OS=Homo sapiens GN=GCLC PE=1 SV=2	728000	1290000	1440000	0.505556	0.895833	0.505556	-0.296231	2
GSHB_HUMAN	8 (7)	263.11	0.000372	1.68	Glutathione synthetase OS=Homo sapiens GN=GSS PE=1 SV=1	27400000	25700000	16300000	1.68098	1.57669	1.68098	0.225563	3.42946
GSHR_HUMAN	5 (5)	164.28	0.000665	2.52	Glutathione reductase, mitochondrial OS=Homo sapiens GN=GSR PE=1 SV=2	11500000	18400000	7300000	1.57534	2.52055	2.52055	0.401495	3.17718
GSLG1_HUMAN	7 (6)	269.39	8.75e-06	2.68	Golgi apparatus protein 1 OS=Homo sapiens GN=GLG1 PE=1 SV=2	6180000	6520000	2440000	2.53279	2.67213	2.67213	0.426858	5.05799
GSTK1_HUMAN	5 (5)	217.89	9.43e-05	4.96	Glutathione S-transferase kappa 1 OS=Homo sapiens GN=GSTK1 PE=1 SV=3	34700000	21900000	6990000	4.96423	3.13305	4.96423	0.695852	4.02549
GSTM3_HUMAN	5 (4)	239.52	0.000122	4.85	Glutathione S-transferase Mu 3 OS=Homo sapiens GN=GSTM3 PE=1 SV=3	4460000	5050000	21700000	0.20553	0.232719	0.20553	-0.687125	3.91364
GSTP1_HUMAN	10 (10)	670.56	0.000597	2.19	Glutathione S-transferase P OS=Homo sapiens GN=GSTP1 PE=1 SV=2	182000000	334000000	153000000	1.18954	2.18301	2.18301	0.339055	3.22403
GT251_HUMAN	3 (3)	102.79	0.000443	5.68	Procollagen galactosyltransferase 1 OS=Homo sapiens GN=COLGALT1 PE=1 SV=1	1800000	4930000	869000	2.07135	5.67319	5.67319	0.753827	3.3536
GTF2I_HUMAN	6 (4)	135.12	5.56e-05	5.65	General transcription factor II-I OS=Homo sapiens GN=GTF2I PE=1 SV=2	6680000	4530000	1180000	5.66102	3.83898	5.66102	0.752894	4.25493
GTR1_HUMAN	5 (5)	139.87	0.000282	2.64	Solute carrier family 2, facilitated glucose transporter member 1 OS=Homo sapiens GN=SLC2A1 PE=1 SV=2	17300000	45500000	38300000	0.451697	1.18799	0.451697	-0.345153	3.54975
H10_HUMAN	5 (2)	235.15	0.00011	3.64	Histone H1.0 OS=Homo sapiens GN=H1F0 PE=1 SV=3	11700000	42800000	23100000	0.506494	1.85281	0.506494	-0.295426	3.95861
H12_HUMAN	4 (2)	197.29	0.000595	2.06	Histone H1.2 OS=Homo sapiens GN=HIST1H1C PE=1 SV=2	4040000	4020000	8270000	0.488513	0.486094	0.486094	-0.313279	3.22548
H15_HUMAN	6 (3)	259.01	2.37e-05	3.65	Histone H1.5 OS=Homo sapiens GN=HIST1H1B PE=1 SV=3	19300000	70500000	31700000	0.608833	2.22397	0.608833	-0.215502	4.62525
H2AY_HUMAN	5 (3)	141.6	0.00167	1.97	Core histone macro-H2A.1 OS=Homo sapiens GN=H2AFY PE=1 SV=4	10200000	15400000	20100000	0.507463	0.766169	0.507463	-0.294596	2.77728
H2B1N_HUMAN	6 (1)	199.67	6.46e-05	3.89	Histone H2B type 1-N OS=Homo sapiens GN=HIST1H2BN PE=1 SV=3	9110000	17900000	35400000	0.257345	0.50565	0.257345	-0.589485	4.18977
H4_HUMAN	6 (6)	334.49	4.13e-06	3.85	Histone H4 OS=Homo sapiens GN=HIST1H4A PE=1 SV=2	174000000	258000000	672000000	0.258929	0.383929	0.258929	-0.58682	5.38405
HACD3_HUMAN	2 (2)	119.63	0.000794	3.69	Very-long-chain (3R)-3-hydroxyacyl-CoA dehydratase 3 OS=Homo sapiens GN=HACD3 PE=1 SV=2	3000000	1440000	5320000	0.56391	0.270677	0.270677	-0.567549	3.10018
HBA_HUMAN	8 (7)	530.8	1.4e-05	2.61	Hemoglobin subunit alpha OS=Homo sapiens GN=HBA1 PE=1 SV=2	2580000000	1100000000	989000000	2.6087	1.11223	2.6087	0.416423	4.85387
HBB_HUMAN	11 (4)	1086.85	5.76e-06	3.55	Hemoglobin subunit beta OS=Homo sapiens GN=HBB PE=1 SV=2	1780000000	915000000	500000000	3.56	1.83	3.56	0.55145	5.23958
HBD_HUMAN	11 (5)	867.65	9.68e-06	4.92	Hemoglobin subunit delta OS=Homo sapiens GN=HBD PE=1 SV=2	156000000	80000000	31800000	4.90566	2.51572	4.90566	0.690697	5.01412
HBG1_HUMAN	3 (2)	171.31	0.000745	8.41	Hemoglobin subunit gamma-1 OS=Homo sapiens GN=HBG1 PE=1 SV=2	14900000	3930000	1780000	8.37079	2.20787	8.37079	0.922766	3.12784
HCD2_HUMAN	5 (4)	186.99	0.00699	3.28	3-hydroxyacyl-CoA dehydrogenase type-2 OS=Homo sapiens GN=HSD17B10 PE=1 SV=3	14200000	12100000	4340000	3.27189	2.78802	3.27189	0.514799	2.15552
HCDH_HUMAN	4 (3)	166.47	0.00229	2.12	Hydroxyacyl-coenzyme A dehydrogenase, mitochondrial OS=Homo sapiens GN=HADH PE=1 SV=3	18900000	25700000	12200000	1.54918	2.10656	2.10656	0.323573	2.64016
HCLS1_HUMAN	1 (1)	17.24	0.000754	3.45	Hematopoietic lineage cell-specific protein OS=Homo sapiens GN=HCLS1 PE=1 SV=3	584000	357000	1230000	0.474797	0.290244	0.290244	-0.537237	3.12263
HDHD1_HUMAN	1 (1)	51.22	0.000846	20.07	Pseudouridine-5'-phosphatase OS=Homo sapiens GN=HDHD1 PE=1 SV=3	1230000	307000	61200	20.098	5.01634	20.098	1.30315	3.07263
HEM1_HUMAN	1 (1)	14.87	0.00203	2.17	5-aminolevulinate synthase, nonspecific, mitochondrial OS=Homo sapiens GN=ALAS1 PE=1 SV=2	2900000	6300000	6020000	0.481728	1.04651	0.481728	-0.317198	2.6925
HEMO_HUMAN	13 (13)	599.22	0.000354	1.69	Hemopexin OS=Homo sapiens GN=HPX PE=1 SV=2	208000000	204000000	123000000	1.69106	1.65854	1.69106	0.228158	3.451
HEXA_HUMAN	2 (2)	76.07	0.00376	1.78	Beta-hexosaminidase subunit alpha OS=Homo sapiens GN=HEXA PE=1 SV=2	3080000	4130000	2320000	1.32759	1.78017	1.78017	0.250462	2.42481
HGH1_HUMAN	1 (1)	15.78	2.08e-05	8.46	Protein HGH1 homolog OS=Homo sapiens GN=HGH1 PE=1 SV=1	185000	83000	702000	0.263533	0.118234	0.118234	-0.927259	4.68194
HINT2_HUMAN	2 (2)	67.29	0.00266	2.53	Histidine triad nucleotide-binding protein 2, mitochondrial OS=Homo sapiens GN=HINT2 PE=1 SV=1	7400000	10200000	4030000	1.83623	2.53102	2.53102	0.403295	2.57512
HMCS2_HUMAN	5 (2)	214.21	0.00489	11.71	Hydroxymethylglutaryl-CoA synthase, mitochondrial OS=Homo sapiens GN=HMGCS2 PE=1 SV=1	618000	6500000	555000	1.11351	11.7117	11.7117	1.06862	2.31069
HMGA1_HUMAN	1 (1)	29.57	0.00146	2.75	High mobility group protein HMG-I/HMG-Y OS=Homo sapiens GN=HMGA1 PE=1 SV=3	322000	830000	885000	0.363842	0.937853	0.363842	-0.439087	2.83565
HMGB2_HUMAN	3 (1)	153.18	1.79e-06	6.82	High mobility group protein B2 OS=Homo sapiens GN=HMGB2 PE=1 SV=2	8030000	7740000	1180000	6.80508	6.55932	6.80508	0.832834	5.74715
HMGB3_HUMAN	1 (1)	32.11	0.00975	3.49	High mobility group protein B3 OS=Homo sapiens GN=HMGB3 PE=1 SV=4	9380000	5260000	2690000	3.48699	1.95539	3.48699	0.542451	2.011
HMGN1_HUMAN	2 (2)	83.97	0.000615	3.86	Non-histone chromosomal protein HMG-14 OS=Homo sapiens GN=HMGN1 PE=1 SV=3	4780000	1320000	5110000	0.935421	0.258317	0.258317	-0.587847	3.21112
HMOX2_HUMAN	2 (1)	65.04	4.87e-05	3	Heme oxygenase 2 OS=Homo sapiens GN=HMOX2 PE=1 SV=2	1290000	847000	431000	2.99304	1.9652	2.99304	0.476112	4.31247
HNRH2_HUMAN	11 (4)	516.43	0.000481	2.86	Heterogeneous nuclear ribonucleoprotein H2 OS=Homo sapiens GN=HNRNPH2 PE=1 SV=1	8500000	17600000	6160000	1.37987	2.85714	2.85714	0.455932	3.31785
HNRL2_HUMAN	16 (15)	612.92	0.000378	1.56	Heterogeneous nuclear ribonucleoprotein U-like protein 2 OS=Homo sapiens GN=HNRNPUL2 PE=1 SV=1	57300000	74700000	48000000	1.19375	1.55625	1.55625	0.192079	3.42251
HNRPQ_HUMAN	13 (7)	551.23	0.01	2.32	Heterogeneous nuclear ribonucleoprotein Q OS=Homo sapiens GN=SYNCRIP PE=1 SV=2	15900000	37000000	19700000	0.807107	1.87817	1.87817	0.273735	2
HPRT_HUMAN	4 (4)	133.57	0.01	1.97	Hypoxanthine-guanine phosphoribosyltransferase OS=Homo sapiens GN=HPRT1 PE=1 SV=2	10300000	7220000	5240000	1.96565	1.37786	1.96565	0.293506	2
HPTR_HUMAN	8 (1)	362.52	0.00362	1.98	Haptoglobin-related protein OS=Homo sapiens GN=HPR PE=2 SV=2	14500000	28800000	18200000	0.796703	1.58242	1.58242	0.199321	2.44129
HRG_HUMAN	6 (4)	278.7	2.48e-05	5.28	Histidine-rich glycoprotein OS=Homo sapiens GN=HRG PE=1 SV=1	15400000	22600000	4280000	3.59813	5.28037	5.28037	0.722665	4.60555
HS105_HUMAN	8 (6)	331.72	0.01	2.43	Heat shock protein 105 kDa OS=Homo sapiens GN=HSPH1 PE=1 SV=1	13600000	11600000	5600000	2.42857	2.07143	2.42857	0.385351	2
HS71A_HUMAN	24 (10)	1340.85	1.81e-05	2.04	Heat shock 70 kDa protein 1A OS=Homo sapiens GN=HSPA1A PE=1 SV=1	116000000	135000000	66100000	1.75492	2.04236	2.04236	0.310132	4.74232
HS904_HUMAN	4 (1)	206.55	0.000112	6.81	Putative heat shock protein HSP 90-alpha A4 OS=Homo sapiens GN=HSP90AA4P PE=5 SV=1	932000	2870000	422000	2.20853	6.80095	6.80095	0.832569	3.95078
HSP74_HUMAN	24 (21)	995.66	5.36e-05	2.1	Heat shock 70 kDa protein 4 OS=Homo sapiens GN=HSPA4 PE=1 SV=4	70600000	42800000	33500000	2.10746	1.27761	2.10746	0.32376	4.27084
HUWE1_HUMAN	8 (6)	221.02	0.000258	3.25	E3 ubiquitin-protein ligase HUWE1 OS=Homo sapiens GN=HUWE1 PE=1 SV=3	6110000	8470000	19800000	0.308586	0.427778	0.308586	-0.510624	3.58838
HV305_HUMAN	3 (1)	144.5	7.03e-07	16.08	Ig heavy chain V-III region BRO OS=Homo sapiens PE=1 SV=1	11400000	10100000	707000	16.1245	14.2857	16.1245	1.20749	6.15304
HV320_HUMAN	3 (1)	68.91	0.00299	13.26	Ig heavy chain V-III region GAL OS=Homo sapiens PE=1 SV=1	1590000	745000	120000	13.25	6.20833	13.25	1.12222	2.52433
HXK1_HUMAN	18 (13)	579.4	0.000164	2.24	Hexokinase-1 OS=Homo sapiens GN=HK1 PE=1 SV=3	34900000	58100000	25900000	1.34749	2.24324	2.24324	0.350876	3.78516
HXK2_HUMAN	6 (3)	159.69	0.0072	2.04	Hexokinase-2 OS=Homo sapiens GN=HK2 PE=1 SV=2	4660000	8130000	3990000	1.16792	2.03759	2.03759	0.309118	2.14267
HXK3_HUMAN	4 (1)	113.35	0.003	490.9	Hexokinase-3 OS=Homo sapiens GN=HK3 PE=1 SV=2	200000	59100000	120000	1.66667	492.5	492.5	2.69241	2.52288
HYEP_HUMAN	11 (8)	355.4	9.91e-05	3.17	Epoxide hydrolase 1 OS=Homo sapiens GN=EPHX1 PE=1 SV=1	22300000	22900000	70600000	0.315864	0.324363	0.315864	-0.5005	4.00393
HYOU1_HUMAN	10 (8)	301.62	0.00034	2.24	Hypoxia up-regulated protein 1 OS=Homo sapiens GN=HYOU1 PE=1 SV=1	12800000	23100000	10300000	1.24272	2.24272	2.24272	0.350775	3.46852
I2BPL_HUMAN	4 (3)	128.16	0.000314	6.77	Interferon regulatory factor 2-binding protein-like OS=Homo sapiens GN=IRF2BPL PE=1 SV=1	1680000	1640000	248000	6.77419	6.6129	6.77419	0.830858	3.50307
IBP3_HUMAN	1 (1)	25.82	0.00714	1.62	Insulin-like growth factor-binding protein 3 OS=Homo sapiens GN=IGFBP3 PE=1 SV=2	1340000	1380000	848000	1.58019	1.62736	1.62736	0.211483	2.1463
IBP7_HUMAN	3 (3)	122.37	0.01	2.45	Insulin-like growth factor-binding protein 7 OS=Homo sapiens GN=IGFBP7 PE=1 SV=1	2940000	1310000	1200000	2.45	1.09167	2.45	0.389166	2
IC1_HUMAN	5 (4)	294.26	0.000558	1.85	Plasma protease C1 inhibitor OS=Homo sapiens GN=SERPING1 PE=1 SV=2	26900000	20200000	14500000	1.85517	1.3931	1.85517	0.268384	3.25337
ICAM1_HUMAN	6 (6)	176.03	0.000151	2.2	Intercellular adhesion molecule 1 OS=Homo sapiens GN=ICAM1 PE=1 SV=2	5900000	12900000	9880000	0.597166	1.30567	0.597166	-0.223905	3.82102
IDHP_HUMAN	10 (8)	350.18	2.71e-05	2.08	Isocitrate dehydrogenase [NADP], mitochondrial OS=Homo sapiens GN=IDH2 PE=1 SV=2	70600000	39700000	34000000	2.07647	1.16765	2.07647	0.317326	4.56703
IF16_HUMAN	11 (8)	318.08	4.84e-05	2.85	Gamma-interferon-inducible protein 16 OS=Homo sapiens GN=IFI16 PE=1 SV=3	10800000	10200000	3800000	2.84211	2.68421	2.84211	0.45364	4.31515
IF2B2_HUMAN	1 (1)	48.74	0.00527	2.6	Insulin-like growth factor 2 mRNA-binding protein 2 OS=Homo sapiens GN=IGF2BP2 PE=1 SV=2	1230000	1430000	3190000	0.38558	0.448276	0.38558	-0.413886	2.27819
IF4A2_HUMAN	11 (2)	460.03	0.00644	2.72	Eukaryotic initiation factor 4A-II OS=Homo sapiens GN=EIF4A2 PE=1 SV=2	3600000	5610000	9800000	0.367347	0.572449	0.367347	-0.434924	2.19111
IF4B_HUMAN	1 (1)	15.83	0.000562	3.77	Eukaryotic translation initiation factor 4B OS=Homo sapiens GN=EIF4B PE=1 SV=2	2430000	3700000	9170000	0.264995	0.40349	0.264995	-0.576763	3.25026
IF4E_HUMAN	1 (1)	26.4	0.00251	13.97	Eukaryotic translation initiation factor 4E OS=Homo sapiens GN=EIF4E PE=1 SV=2	1200000	1970000	141000	8.51064	13.9716	13.9716	1.14525	2.60033
IF4G2_HUMAN	1 (1)	15.62	7.57e-06	6.95	Eukaryotic translation initiation factor 4 gamma 2 OS=Homo sapiens GN=EIF4G2 PE=1 SV=1	1830000	2440000	352000	5.19886	6.93182	6.93182	0.840847	5.1209
IF5_HUMAN	2 (2)	92.16	0.000919	2.35	Eukaryotic translation initiation factor 5 OS=Homo sapiens GN=EIF5 PE=1 SV=2	2680000	4840000	6280000	0.426752	0.770701	0.426752	-0.369825	3.03668
IF5A1_HUMAN	7 (1)	336.91	0.00457	119.52	Eukaryotic translation initiation factor 5A-1 OS=Homo sapiens GN=EIF5A PE=1 SV=2	1900000	25400000	213000	8.92019	119.249	119.249	2.07645	2.34008
IF6_HUMAN	3 (3)	90.51	0.000101	2.38	Eukaryotic translation initiation factor 6 OS=Homo sapiens GN=EIF6 PE=1 SV=1	3720000	4710000	1980000	1.87879	2.37879	2.37879	0.376356	3.99568
IFIT3_HUMAN	3 (2)	60.21	3.1e-06	12.03	Interferon-induced protein with tetratricopeptide repeats 3 OS=Homo sapiens GN=IFIT3 PE=1 SV=1	4230000	2090000	351000	12.0513	5.95442	12.0513	1.08103	5.50864
IFM1_HUMAN	1 (1)	90.4	4.94e-06	2.88	Interferon-induced transmembrane protein 1 OS=Homo sapiens GN=IFITM1 PE=1 SV=3	11600000	8840000	4040000	2.87129	2.18812	2.87129	0.458077	5.30627
IGHA1_HUMAN	13 (4)	729.19	3.47e-06	2.94	Ig alpha-1 chain C region OS=Homo sapiens GN=IGHA1 PE=1 SV=2	119000000	119000000	40600000	2.93103	2.93103	2.93103	0.467021	5.45967
IGHA2_HUMAN	11 (2)	534.2	1.83e-06	552.58	Ig alpha-2 chain C region OS=Homo sapiens GN=IGHA2 PE=1 SV=3	9060000	33300000	60300	150.249	552.239	552.239	2.74213	5.73755
IGHG2_HUMAN	10 (3)	497.16	3.94e-05	3.07	Ig gamma-2 chain C region OS=Homo sapiens GN=IGHG2 PE=1 SV=2	116000000	69000000	37900000	3.06069	1.82058	3.06069	0.485819	4.4045
IGHG3_HUMAN	10 (1)	466.11	4.12e-07	8.94	Ig gamma-3 chain C region OS=Homo sapiens GN=IGHG3 PE=1 SV=2	8950000	7970000	1000000	8.95	7.97	8.95	0.951823	6.3851
IGHG4_HUMAN	8 (2)	481.21	0.00129	3.34	Ig gamma-4 chain C region OS=Homo sapiens GN=IGHG4 PE=1 SV=1	4380000	1310000	3080000	1.42208	0.425325	0.425325	-0.371279	2.88941
IGHM_HUMAN	12 (6)	378.81	3.18e-05	8.55	Ig mu chain C region OS=Homo sapiens GN=IGHM PE=1 SV=3	112000000	27400000	13000000	8.61538	2.10769	8.61538	0.935275	4.49757
IGKC_HUMAN	6 (5)	587.21	3.14e-05	2.49	Ig kappa chain C region OS=Homo sapiens GN=IGKC PE=1 SV=1	429000000	345000000	172000000	2.49419	2.00581	2.49419	0.396929	4.50307
IGLL5_HUMAN	4 (2)	196.79	0.00043	2.41	Immunoglobulin lambda-like polypeptide 5 OS=Homo sapiens GN=IGLL5 PE=2 SV=2	53200000	33600000	22100000	2.40724	1.52036	2.40724	0.381519	3.36653
ILEU_HUMAN	5 (5)	135.77	0.000103	2.66	Leukocyte elastase inhibitor OS=Homo sapiens GN=SERPINB1 PE=1 SV=1	12100000	15300000	5760000	2.10069	2.65625	2.65625	0.424269	3.98716
ILK_HUMAN	5 (4)	121.98	6.05e-08	2.16	Integrin-linked protein kinase OS=Homo sapiens GN=ILK PE=1 SV=2	7360000	11700000	5430000	1.35543	2.1547	2.1547	0.333386	7.21824
IMA6_HUMAN	1 (1)	45.65	0.02	6.28	Importin subunit alpha-6 OS=Homo sapiens GN=KPNA5 PE=1 SV=2	1720000	1260000	273000	6.30037	4.61538	6.30037	0.799366	1.69897
INF2_HUMAN	1 (1)	22.29	0.0002	2.67	Inverted formin-2 OS=Homo sapiens GN=INF2 PE=1 SV=2	734000	883000	331000	2.21752	2.66767	2.66767	0.426133	3.69897
IPO9_HUMAN	3 (3)	70.4	4.87e-08	15.04	Importin-9 OS=Homo sapiens GN=IPO9 PE=1 SV=3	6510000	97900000	6930000	0.939394	14.127	14.127	1.15005	7.31247
IPYR2_HUMAN	2 (2)	77.34	0.00212	13.91	Inorganic pyrophosphatase 2, mitochondrial OS=Homo sapiens GN=PPA2 PE=1 SV=2	3160000	3350000	241000	13.112	13.9004	13.9004	1.14303	2.67366
IQCC_HUMAN	1 (1)	28.77	0.0004	3.51	IQ domain-containing protein C OS=Homo sapiens GN=IQCC PE=2 SV=2	5530000	2230000	7810000	0.708067	0.285531	0.285531	-0.544346	3.39794
IQGA1_HUMAN	35 (28)	1505.22	1.8e-06	2.78	Ras GTPase-activating-like protein IQGAP1 OS=Homo sapiens GN=IQGAP1 PE=1 SV=1	142000000	124000000	51100000	2.77886	2.42661	2.77886	0.443867	5.74473
ISLR_HUMAN	2 (2)	41.2	0.000863	14.63	Immunoglobulin superfamily containing leucine-rich repeat protein OS=Homo sapiens GN=ISLR PE=2 SV=1	2250000	3800000	260000	8.65385	14.6154	14.6154	1.16481	3.06399
IST1_HUMAN	3 (2)	87.13	0.000176	2.57	IST1 homolog OS=Homo sapiens GN=IST1 PE=1 SV=1	3360000	3710000	1440000	2.33333	2.57639	2.57639	0.411011	3.75449
ITAV_HUMAN	6 (4)	185.63	0.00802	2.97	Integrin alpha-V OS=Homo sapiens GN=ITGAV PE=1 SV=2	5200000	8010000	2700000	1.92593	2.96667	2.96667	0.472269	2.09583
ITB1_HUMAN	15 (14)	528.22	0.000802	2.12	Integrin beta-1 OS=Homo sapiens GN=ITGB1 PE=1 SV=2	46100000	60900000	28700000	1.60627	2.12195	2.12195	0.326735	3.09583
ITB2_HUMAN	7 (5)	319.47	0.000647	2.58	Integrin beta-2 OS=Homo sapiens GN=ITGB2 PE=1 SV=2	9840000	7660000	3810000	2.58268	2.0105	2.58268	0.41207	3.1891
ITIH1_HUMAN	5 (5)	201.96	9.51e-05	19.96	Inter-alpha-trypsin inhibitor heavy chain H1 OS=Homo sapiens GN=ITIH1 PE=1 SV=3	15400000	22200000	1110000	13.8739	20	20	1.30103	4.02182
ITIH2_HUMAN	10 (10)	321.31	0.00175	3.38	Inter-alpha-trypsin inhibitor heavy chain H2 OS=Homo sapiens GN=ITIH2 PE=1 SV=2	30000000	35500000	10500000	2.85714	3.38095	3.38095	0.529039	2.75696
ITIH4_HUMAN	4 (4)	131.82	0.00182	2.23	Inter-alpha-trypsin inhibitor heavy chain H4 OS=Homo sapiens GN=ITIH4 PE=1 SV=4	8220000	6250000	3690000	2.22764	1.69377	2.22764	0.347845	2.73993
IVD_HUMAN	2 (2)	114.11	0.00254	15.26	Isovaleryl-CoA dehydrogenase, mitochondrial OS=Homo sapiens GN=IVD PE=1 SV=1	281000	1490000	97700	2.87615	15.2508	15.2508	1.18329	2.59517
JUNB_HUMAN	2 (2)	39.98	0.0012	2.13	Transcription factor jun-B OS=Homo sapiens GN=JUNB PE=1 SV=1	3450000	3100000	6590000	0.52352	0.47041	0.47041	-0.327524	2.92082
K1C10_HUMAN	13 (7)	652.23	4.54e-05	1.94	Keratin, type I cytoskeletal 10 OS=Homo sapiens GN=KRT10 PE=1 SV=6	22600000	43800000	43400000	0.520737	1.00922	0.520737	-0.283381	4.34294
K1C17_HUMAN	11 (1)	555.14	0.00419	3.22	Keratin, type I cytoskeletal 17 OS=Homo sapiens GN=KRT17 PE=1 SV=2	2200000	5120000	1590000	1.38365	3.22013	3.22013	0.507873	2.37779
K1C18_HUMAN	18 (12)	943.83	6.83e-06	3.58	Keratin, type I cytoskeletal 18 OS=Homo sapiens GN=KRT18 PE=1 SV=2	67800000	44500000	159000000	0.426415	0.279874	0.279874	-0.553037	5.16558
K1C19_HUMAN	21 (12)	1102.88	4.69e-05	2.35	Keratin, type I cytoskeletal 19 OS=Homo sapiens GN=KRT19 PE=1 SV=4	134000000	139000000	59000000	2.27119	2.35593	2.35593	0.372163	4.32883
K1C9_HUMAN	14 (12)	711.99	0.000968	2.25	Keratin, type I cytoskeletal 9 OS=Homo sapiens GN=KRT9 PE=1 SV=3	27500000	62100000	31300000	0.878594	1.98403	1.98403	0.297547	3.01412
K22E_HUMAN	16 (8)	819.52	0.00381	1.95	Keratin, type II cytoskeletal 2 epidermal OS=Homo sapiens GN=KRT2 PE=1 SV=2	10500000	20600000	16200000	0.648148	1.2716	0.648148	-0.188326	2.41908
K2C1_HUMAN	21 (16)	1115.18	8.52e-06	2.47	Keratin, type II cytoskeletal 1 OS=Homo sapiens GN=KRT1 PE=1 SV=6	35300000	87300000	75700000	0.466314	1.15324	0.466314	-0.331321	5.06956
K2C7_HUMAN	21 (10)	1032.1	6.23e-06	2.21	Keratin, type II cytoskeletal 7 OS=Homo sapiens GN=KRT7 PE=1 SV=5	39200000	56100000	86400000	0.453704	0.649306	0.453704	-0.343228	5.20551
K2C8_HUMAN	26 (17)	1476.55	2.76e-05	1.64	Keratin, type II cytoskeletal 8 OS=Homo sapiens GN=KRT8 PE=1 SV=7	224000000	226000000	367000000	0.610354	0.615804	0.610354	-0.214418	4.55909
KAD1_HUMAN	4 (3)	158.02	0.00098	4.44	Adenylate kinase isoenzyme 1 OS=Homo sapiens GN=AK1 PE=1 SV=3	3430000	2650000	772000	4.44301	3.43264	4.44301	0.647677	3.00877
KAD2_HUMAN	8 (7)	297.02	0.00187	2.28	Adenylate kinase 2, mitochondrial OS=Homo sapiens GN=AK2 PE=1 SV=2	21000000	47800000	23400000	0.897436	2.04274	2.04274	0.310212	2.72816
KAP2_HUMAN	4 (4)	99.68	0.000126	4.05	cAMP-dependent protein kinase type II-alpha regulatory subunit OS=Homo sapiens GN=PRKAR2A PE=1 SV=2	8090000	10100000	2490000	3.249	4.05622	4.05622	0.608122	3.89963
KCD12_HUMAN	9 (6)	344.6	8.85e-07	10.69	BTB/POZ domain-containing protein KCTD12 OS=Homo sapiens GN=KCTD12 PE=1 SV=1	17600000	75400000	7050000	2.49645	10.695	10.695	1.02918	6.05306
KCRB_HUMAN	11 (10)	615.77	4.25e-07	6.21	Creatine kinase B-type OS=Homo sapiens GN=CKB PE=1 SV=1	17600000	109000000	23700000	0.742616	4.59916	4.59916	0.662678	6.37161
KCRU_HUMAN	1 (1)	49.63	0.00619	8965.23	Creatine kinase U-type, mitochondrial OS=Homo sapiens GN=CKMT1A PE=1 SV=1	1023.7	9180000	9576.06	0.106902	958.641	0.106902	-0.971014	2.20831
KCY_HUMAN	6 (6)	250.16	6.49e-06	6.67	UMP-CMP kinase OS=Homo sapiens GN=CMPK1 PE=1 SV=3	7800000	20500000	3070000	2.54072	6.67752	6.67752	0.824615	5.18776
KDM6B_HUMAN	1 (1)	27.03	8.34e-07	3.78	Lysine-specific demethylase 6B OS=Homo sapiens GN=KDM6B PE=1 SV=4	13500000	28200000	7460000	1.80965	3.78016	3.78016	0.57751	6.07883
KI20A_HUMAN	1 (1)	18.29	0.0085	5.64	Kinesin-like protein KIF20A OS=Homo sapiens GN=KIF20A PE=1 SV=1	1540000	280000	273000	5.64103	1.02564	5.64103	0.751358	2.07058
KINH_HUMAN	5 (4)	146.68	0.01	21.2	Kinesin-1 heavy chain OS=Homo sapiens GN=KIF5B PE=1 SV=1	2500000	3330000	157000	15.9236	21.2102	21.2102	1.32654	2
KLC1_HUMAN	2 (1)	87.1	0.00697	12.21	Kinesin light chain 1 OS=Homo sapiens GN=KLC1 PE=1 SV=2	927000	478000	75900	12.2134	6.29776	12.2134	1.08684	2.15677
KLH35_HUMAN	1 (1)	25.97	0.01	3.85	Kelch-like protein 35 OS=Homo sapiens GN=KLHL35 PE=1 SV=3	3380000	11400000	13000000	0.26	0.876923	0.26	-0.585027	2
KLKB1_HUMAN	3 (3)	101.35	0.000249	2.89	Plasma kallikrein OS=Homo sapiens GN=KLKB1 PE=1 SV=1	3860000	1970000	1340000	2.8806	1.47015	2.8806	0.459483	3.6038
KNG1_HUMAN	5 (5)	188.47	0.000226	3.22	Kininogen-1 OS=Homo sapiens GN=KNG1 PE=1 SV=2	37700000	38100000	11800000	3.19492	3.22881	3.22881	0.509043	3.64589
KPYM_HUMAN	29 (25)	2057.23	5.42e-06	2.38	Pyruvate kinase PKM OS=Homo sapiens GN=PKM PE=1 SV=4	589000000	1400000000	723000000	0.814661	1.93638	1.93638	0.28699	5.266
KV201_HUMAN	1 (1)	97.42	7.66e-07	5.3	Ig kappa chain V-II region Cum OS=Homo sapiens PE=1 SV=1	20300000	14900000	3830000	5.30026	3.89034	5.30026	0.724297	6.11577
LA_HUMAN	7 (7)	373.8	0.0003	1.65	Lupus La protein OS=Homo sapiens GN=SSB PE=1 SV=2	28500000	21700000	17300000	1.6474	1.25434	1.6474	0.216799	3.52288
LAC1_HUMAN	3 (1)	229.67	0.000251	4.3	Ig lambda-1 chain C regions OS=Homo sapiens GN=IGLC1 PE=1 SV=1	6670000	1550000	1660000	4.01807	0.933735	4.01807	0.604018	3.60033
LAMA4_HUMAN	3 (3)	66.15	0.000574	3.83	Laminin subunit alpha-4 OS=Homo sapiens GN=LAMA4 PE=1 SV=4	1550000	1290000	404000	3.83663	3.19307	3.83663	0.58395	3.24109
LAMC1_HUMAN	13 (13)	410.87	0.000657	5.52	Laminin subunit gamma-1 OS=Homo sapiens GN=LAMC1 PE=1 SV=3	11900000	12300000	2220000	5.36036	5.54054	5.54054	0.743552	3.18243
LAMP2_HUMAN	2 (2)	87.96	0.00317	2.96	Lysosome-associated membrane glycoprotein 2 OS=Homo sapiens GN=LAMP2 PE=1 SV=2	1730000	5110000	3150000	0.549206	1.62222	0.549206	-0.260264	2.49894
LASP1_HUMAN	6 (6)	243.78	0.000774	2.3	LIM and SH3 domain protein 1 OS=Homo sapiens GN=LASP1 PE=1 SV=2	17100000	21500000	9330000	1.8328	2.30439	2.30439	0.362557	3.11126
LCAP_HUMAN	2 (2)	53.44	0.00149	5.99	Leucyl-cystinyl aminopeptidase OS=Homo sapiens GN=LNPEP PE=1 SV=3	1510000	1650000	275000	5.49091	6	6	0.778151	2.82681
LDHA_HUMAN	20 (16)	998.93	1.89e-05	2.01	L-lactate dehydrogenase A chain OS=Homo sapiens GN=LDHA PE=1 SV=2	289000000	492000000	582000000	0.496564	0.845361	0.496564	-0.304025	4.72354
LDHB_HUMAN	16 (13)	819.41	2.07e-05	2.73	L-lactate dehydrogenase B chain OS=Homo sapiens GN=LDHB PE=1 SV=2	108000000	83400000	228000000	0.473684	0.365789	0.365789	-0.436769	4.68403
LEG1_HUMAN	8 (7)	521.31	7.28e-05	1.89	Galectin-1 OS=Homo sapiens GN=LGALS1 PE=1 SV=2	124000000	235000000	211000000	0.587678	1.11374	0.587678	-0.230861	4.13787
LEG3_HUMAN	3 (2)	115.92	3.13e-05	3.41	Galectin-3 OS=Homo sapiens GN=LGALS3 PE=1 SV=5	13300000	35500000	10400000	1.27885	3.41346	3.41346	0.533195	4.50446
LEG4_HUMAN	6 (5)	286.42	6.69e-07	7.35	Galectin-4 OS=Homo sapiens GN=LGALS4 PE=1 SV=1	7930000	57800000	7870000	1.00762	7.34435	7.34435	0.865953	6.17457
LEMD2_HUMAN	2 (2)	134.47	0.00441	1.95	LEM domain-containing protein 2 OS=Homo sapiens GN=LEMD2 PE=1 SV=1	5250000	7090000	3640000	1.44231	1.9478	1.9478	0.289545	2.35556
LETM1_HUMAN	7 (6)	186.38	1.99e-05	7.74	LETM1 and EF-hand domain-containing protein 1, mitochondrial OS=Homo sapiens GN=LETM1 PE=1 SV=1	8760000	3970000	1130000	7.75221	3.51327	7.75221	0.889426	4.70115
LGUL_HUMAN	6 (4)	178.3	0.01	2.17	Lactoylglutathione lyase OS=Homo sapiens GN=GLO1 PE=1 SV=4	33000000	25100000	15200000	2.17105	1.65132	2.17105	0.33667	2
LIMA1_HUMAN	4 (3)	138.23	5.06e-07	3.75	LIM domain and actin-binding protein 1 OS=Homo sapiens GN=LIMA1 PE=1 SV=1	3370000	2470000	896000	3.76116	2.7567	3.76116	0.575322	6.29585
LIMS1_HUMAN	1 (1)	35.16	0.000705	5.26	LIM and senescent cell antigen-like-containing domain protein 1 OS=Homo sapiens GN=LIMS1 PE=1 SV=4	2130000	2620000	498000	4.27711	5.26104	5.26104	0.721072	3.15181
LIS1_HUMAN	4 (2)	105.79	0.01	2.51	Platelet-activating factor acetylhydrolase IB subunit alpha OS=Homo sapiens GN=PAFAH1B1 PE=1 SV=2	3100000	4700000	1880000	1.64894	2.5	2.5	0.39794	2
LMCD1_HUMAN	3 (2)	112.47	2.3e-06	2.26	LIM and cysteine-rich domains protein 1 OS=Homo sapiens GN=LMCD1 PE=1 SV=1	5650000	9480000	4190000	1.34845	2.26253	2.26253	0.354594	5.63827
LMO7_HUMAN	2 (2)	127.11	4.15e-05	7.08	LIM domain only protein 7 OS=Homo sapiens GN=LMO7 PE=1 SV=3	695000	2050000	290000	2.39655	7.06897	7.06897	0.849356	4.38195
LONM_HUMAN	8 (6)	274.97	0.02	1.74	Lon protease homolog, mitochondrial OS=Homo sapiens GN=LONP1 PE=1 SV=2	8990000	9520000	15700000	0.572611	0.606369	0.572611	-0.24214	1.69897
LOX15_HUMAN	3 (3)	107.65	2.27e-05	11.73	Arachidonate 15-lipoxygenase OS=Homo sapiens GN=ALOX15 PE=1 SV=3	1430000	520000	6100000	0.234426	0.0852459	0.0852459	-1.06933	4.64397
LPP_HUMAN	4 (4)	144.65	0.00856	7.44	Lipoma-preferred partner OS=Homo sapiens GN=LPP PE=1 SV=1	8930000	11300000	1520000	5.875	7.43421	7.43421	0.871235	2.06753
LPPRC_HUMAN	19 (15)	762.04	7.21e-05	2.98	Leucine-rich PPR motif-containing protein, mitochondrial OS=Homo sapiens GN=LRPPRC PE=1 SV=3	25500000	37100000	12400000	2.05645	2.99194	2.99194	0.475952	4.14206
LRC47_HUMAN	1 (1)	40.15	7.55e-05	162.55	Leucine-rich repeat-containing protein 47 OS=Homo sapiens GN=LRRC47 PE=1 SV=1	862000	5301.92	36800	23.4239	0.144074	23.4239	1.36966	4.12205
LRC49_HUMAN	1 (1)	22.43	0.000144	2.88	Leucine-rich repeat-containing protein 49 OS=Homo sapiens GN=LRRC49 PE=2 SV=2	674000	1940000	1400000	0.481429	1.38571	0.481429	-0.317468	3.84164
LRC59_HUMAN	5 (5)	138.41	0.000275	2.8	Leucine-rich repeat-containing protein 59 OS=Homo sapiens GN=LRRC59 PE=1 SV=1	8760000	24500000	9920000	0.883065	2.46976	2.46976	0.392654	3.56067
LRP1_HUMAN	12 (11)	293.14	1.83e-07	2.16	Prolow-density lipoprotein receptor-related protein 1 OS=Homo sapiens GN=LRP1 PE=1 SV=2	19900000	22100000	10200000	1.95098	2.16667	2.16667	0.335792	6.73755
LRRF1_HUMAN	3 (2)	133.49	1.83e-05	38.34	Leucine-rich repeat flightless-interacting protein 1 OS=Homo sapiens GN=LRRFIP1 PE=1 SV=2	1410000	992000	36900	38.2114	26.8835	38.2114	1.58219	4.73755
LSM3_HUMAN	1 (1)	19.97	0.00858	79.34	U6 snRNA-associated Sm-like protein LSm3 OS=Homo sapiens GN=LSM3 PE=1 SV=2	21000	962000	1670000	0.0125749	0.576048	0.0125749	-1.9005	2.06651
LSM6_HUMAN	1 (1)	45.2	0.000288	2.89	U6 snRNA-associated Sm-like protein LSm6 OS=Homo sapiens GN=LSM6 PE=1 SV=1	3460000	4890000	10000000	0.346	0.489	0.346	-0.460924	3.54061
LSM7_HUMAN	1 (1)	38.94	0.00778	2.39	U6 snRNA-associated Sm-like protein LSm7 OS=Homo sapiens GN=LSM7 PE=1 SV=1	2810000	3190000	1330000	2.11278	2.3985	2.3985	0.379939	2.10902
LSP1_HUMAN	4 (3)	135.84	0.00671	1095.52	Lymphocyte-specific protein 1 OS=Homo sapiens GN=LSP1 PE=1 SV=1	5280000	2060000	4820.5	1095.32	427.342	1095.32	3.03954	2.17328
LTBP2_HUMAN	6 (6)	175.54	2.15e-05	76.33	Latent-transforming growth factor beta-binding protein 2 OS=Homo sapiens GN=LTBP2 PE=1 SV=3	7350000	5350000	96200	76.4033	55.6133	76.4033	1.88311	4.66756
LTOR1_HUMAN	3 (3)	103.27	0.000413	3.92	Ragulator complex protein LAMTOR1 OS=Homo sapiens GN=LAMTOR1 PE=1 SV=2	1920000	2590000	661000	2.90469	3.91831	3.91831	0.593098	3.38405
LUM_HUMAN	9 (9)	361.57	4.1e-06	5.8	Lumican OS=Homo sapiens GN=LUM PE=1 SV=2	192000000	172000000	33000000	5.81818	5.21212	5.81818	0.764787	5.38722
LV102_HUMAN	1 (1)	73.35	0.000938	3.64	Ig lambda chain V-I region HA OS=Homo sapiens PE=1 SV=1	5460000	7130000	1960000	2.78571	3.63776	3.63776	0.560833	3.0278
LV301_HUMAN	1 (1)	18.41	1.34e-05	4.36	Ig lambda chain V-III region SH OS=Homo sapiens PE=1 SV=1	1650000	2370000	544000	3.03309	4.35662	4.35662	0.639149	4.8729
LV302_HUMAN	2 (2)	158.55	0.000841	8.95	Ig lambda chain V-III region LOI OS=Homo sapiens PE=1 SV=1	14500000	6490000	1620000	8.95062	4.00617	8.95062	0.951853	3.0752
LYAG_HUMAN	5 (4)	151.4	1.76e-05	11.62	Lysosomal alpha-glucosidase OS=Homo sapiens GN=GAA PE=1 SV=4	3340000	6360000	548000	6.09489	11.6058	11.6058	1.06468	4.75449
LYPA2_HUMAN	1 (1)	16.79	1.11e-05	28.99	Acyl-protein thioesterase 2 OS=Homo sapiens GN=LYPLA2 PE=1 SV=1	1410000	4120000	142000	9.92958	29.0141	29.0141	1.46261	4.95468
LYRIC_HUMAN	7 (7)	198.39	0.000493	1.58	Protein LYRIC OS=Homo sapiens GN=MTDH PE=1 SV=2	14800000	12800000	20200000	0.732673	0.633663	0.633663	-0.198141	3.30715
LYSC_HUMAN	4 (3)	146.38	0.00389	6.08	Lysozyme C OS=Homo sapiens GN=LYZ PE=1 SV=1	18200000	11400000	2990000	6.08696	3.81271	6.08696	0.7844	2.41005
M3K1_HUMAN	1 (1)	15.29	1.32e-05	4.82	Mitogen-activated protein kinase kinase kinase 1 OS=Homo sapiens GN=MAP3K1 PE=1 SV=4	766000	1900000	394000	1.94416	4.82234	4.82234	0.683257	4.87943
MACF1_HUMAN	9 (4)	245.72	0.00113	2.77	Microtubule-actin cross-linking factor 1, isoforms 1/2/3/5 OS=Homo sapiens GN=MACF1 PE=1 SV=4	4410000	4950000	1790000	2.46369	2.76536	2.76536	0.441752	2.94692
MAL2_HUMAN	1 (1)	15.58	2.36e-05	10.15	Protein MAL2 OS=Homo sapiens GN=MAL2 PE=1 SV=1	6660000	3760000	657000	10.137	5.72298	10.137	1.00591	4.62709
MAP4_HUMAN	9 (8)	252.03	0.00792	1.91	Microtubule-associated protein 4 OS=Homo sapiens GN=MAP4 PE=1 SV=3	28800000	15000000	17900000	1.60894	0.837989	1.60894	0.206539	2.10127
MARCS_HUMAN	7 (7)	308.45	2.74e-05	7.74	Myristoylated alanine-rich C-kinase substrate OS=Homo sapiens GN=MARCKS PE=1 SV=4	17300000	27400000	3540000	4.88701	7.74011	7.74011	0.888747	4.56225
MARE1_HUMAN	2 (2)	73.64	0.00105	3.5	Microtubule-associated protein RP/EB family member 1 OS=Homo sapiens GN=MAPRE1 PE=1 SV=3	4720000	8480000	2420000	1.95041	3.50413	3.50413	0.54458	2.97881
MARF1_HUMAN	1 (1)	21.41	0.000716	1.55	Meiosis arrest female protein 1 OS=Homo sapiens GN=KIAA0430 PE=1 SV=6	2880000	2930000	1880000	1.53191	1.55851	1.55851	0.19271	3.14509
MAT2B_HUMAN	2 (2)	76.87	0.00814	6.95	Methionine adenosyltransferase 2 subunit beta OS=Homo sapiens GN=MAT2B PE=1 SV=1	3880000	7030000	1010000	3.84158	6.9604	6.9604	0.842634	2.08938
MAVS_HUMAN	1 (1)	33.89	0.000352	10.06	Mitochondrial antiviral-signaling protein OS=Homo sapiens GN=MAVS PE=1 SV=2	1030000	885000	103000	10	8.59223	10	1	3.45346
MCA3_HUMAN	2 (1)	46.89	1.45e-05	4.03	Eukaryotic translation elongation factor 1 epsilon-1 OS=Homo sapiens GN=EEF1E1 PE=1 SV=1	1070000	4300000	3130000	0.341853	1.3738	0.341853	-0.466161	4.83863
MCCB_HUMAN	1 (1)	24.69	0.00643	3.5	Methylcrotonoyl-CoA carboxylase beta chain, mitochondrial OS=Homo sapiens GN=MCCC2 PE=1 SV=1	1850000	1730000	529000	3.49716	3.27032	3.49716	0.543716	2.19179
MCM3_HUMAN	5 (3)	97.13	0.00101	18.87	DNA replication licensing factor MCM3 OS=Homo sapiens GN=MCM3 PE=1 SV=3	4770000	1380000	253000	18.8538	5.45455	18.8538	1.2754	2.99568
MCM4_HUMAN	1 (1)	46.69	0.00671	5.55	DNA replication licensing factor MCM4 OS=Homo sapiens GN=MCM4 PE=1 SV=5	2670000	1290000	482000	5.53942	2.67635	5.53942	0.743464	2.17328
MCM6_HUMAN	3 (3)	108.68	6.14e-08	4.41	DNA replication licensing factor MCM6 OS=Homo sapiens GN=MCM6 PE=1 SV=1	4560000	1460000	1030000	4.42718	1.41748	4.42718	0.646128	7.21183
MD1L1_HUMAN	1 (1)	15.96	0.00517	6.19	Mitotic spindle assembly checkpoint protein MAD1 OS=Homo sapiens GN=MAD1L1 PE=1 SV=2	154000	237000	38400	4.01042	6.17188	6.17188	0.790417	2.28651
MDHC_HUMAN	11 (9)	470.04	0.00138	2.35	Malate dehydrogenase, cytoplasmic OS=Homo sapiens GN=MDH1 PE=1 SV=4	53000000	112000000	47700000	1.11111	2.34801	2.34801	0.3707	2.86012
MDHM_HUMAN	15 (11)	831.89	0.000681	1.66	Malate dehydrogenase, mitochondrial OS=Homo sapiens GN=MDH2 PE=1 SV=3	202000000	213000000	128000000	1.57812	1.66406	1.66406	0.22117	3.16685
MECP2_HUMAN	3 (2)	80.01	0.00381	20.51	Methyl-CpG-binding protein 2 OS=Homo sapiens GN=MECP2 PE=1 SV=1	1210000	59200	337000	3.5905	0.175668	3.5905	0.555155	2.41908
MESD_HUMAN	1 (1)	18.21	0.000248	5.53	LDLR chaperone MESD OS=Homo sapiens GN=MESDC2 PE=1 SV=2	1880000	672000	3720000	0.505376	0.180645	0.180645	-0.743174	3.60555
MET7A_HUMAN	2 (2)	57.06	0.02	2.69	Methyltransferase-like protein 7A OS=Homo sapiens GN=METTL7A PE=1 SV=1	1610000	3190000	1190000	1.35294	2.68067	2.68067	0.428244	1.69897
MFGM_HUMAN	5 (5)	152.83	0.000745	4.77	Lactadherin OS=Homo sapiens GN=MFGE8 PE=1 SV=2	21300000	8520000	4460000	4.77578	1.91031	4.77578	0.679045	3.12784
MGMT_HUMAN	1 (1)	52.39	0.00228	14.82	Methylated-DNA--protein-cysteine methyltransferase OS=Homo sapiens GN=MGMT PE=1 SV=1	175000	579000	39100	4.4757	14.8082	14.8082	1.1705	2.64207
MGST3_HUMAN	1 (1)	33.69	0.000929	2.62	Microsomal glutathione S-transferase 3 OS=Homo sapiens GN=MGST3 PE=1 SV=1	4750000	4250000	1820000	2.60989	2.33516	2.60989	0.416622	3.03198
MIC10_HUMAN	1 (1)	25.79	0.000134	1.99	MICOS complex subunit MIC10 OS=Homo sapiens GN=MINOS1 PE=1 SV=1	5550000	11000000	6160000	0.900974	1.78571	1.78571	0.251812	3.8729
MIC19_HUMAN	5 (4)	194.16	0.01	1.8	MICOS complex subunit MIC19 OS=Homo sapiens GN=CHCHD3 PE=1 SV=1	12800000	10300000	7130000	1.79523	1.4446	1.79523	0.25412	2
MIF_HUMAN	3 (2)	182.94	1.58e-05	2.87	Macrophage migration inhibitory factor OS=Homo sapiens GN=MIF PE=1 SV=4	31400000	90000000	84700000	0.37072	1.06257	0.37072	-0.430954	4.80134
MK_HUMAN	1 (1)	37.48	0.00128	44.51	Midkine OS=Homo sapiens GN=MDK PE=1 SV=1	4190000	666000	94100	44.5271	7.07758	44.5271	1.64862	2.89279
ML12A_HUMAN	6 (2)	419.45	0.000302	2	Myosin regulatory light chain 12A OS=Homo sapiens GN=MYL12A PE=1 SV=2	42000000	51500000	25700000	1.63424	2.00389	2.00389	0.301874	3.51999
MMP10_HUMAN	1 (1)	18.5	0.0028	3.28	Stromelysin-2 OS=Homo sapiens GN=MMP10 PE=1 SV=1	3410000	11200000	7710000	0.442283	1.45266	0.442283	-0.3543	2.55284
MMSA_HUMAN	4 (4)	129.43	0.01	1.92	Methylmalonate-semialdehyde dehydrogenase [acylating], mitochondrial OS=Homo sapiens GN=ALDH6A1 PE=1 SV=2	3090000	4530000	2360000	1.30932	1.91949	1.91949	0.283186	2
MOES_HUMAN	25 (15)	1164.74	2.76e-06	2.14	Moesin OS=Homo sapiens GN=MSN PE=1 SV=3	105000000	164000000	76800000	1.36719	2.13542	2.13542	0.329483	5.55909
MOT4_HUMAN	2 (2)	34.69	1.69e-05	16.09	Monocarboxylate transporter 4 OS=Homo sapiens GN=SLC16A3 PE=1 SV=1	244000	3930000	974000	0.250513	4.03491	0.250513	-0.601169	4.77211
MP2K2_HUMAN	1 (1)	14.17	0.00471	663.28	Dual specificity mitogen-activated protein kinase kinase 2 OS=Homo sapiens GN=MAP2K2 PE=1 SV=1	368000	482000	727.34	505.953	662.689	662.689	2.82131	2.32698
MPCP_HUMAN	7 (5)	323.55	0.00112	1.76	Phosphate carrier protein, mitochondrial OS=Homo sapiens GN=SLC25A3 PE=1 SV=2	35500000	31000000	54700000	0.648995	0.566728	0.566728	-0.246626	2.95078
MPPB_HUMAN	3 (2)	79.06	0.000779	18.55	Mitochondrial-processing peptidase subunit beta OS=Homo sapiens GN=PMPCB PE=1 SV=2	1430000	77200	567000	2.52205	0.136155	2.52205	0.401753	3.10846
MRC2_HUMAN	5 (5)	171.77	0.00042	2.72	C-type mannose receptor 2 OS=Homo sapiens GN=MRC2 PE=1 SV=2	6010000	7770000	2850000	2.10877	2.72632	2.72632	0.435576	3.37675
MTA2_HUMAN	1 (1)	15.84	0.000455	11.58	Metastasis-associated protein MTA2 OS=Homo sapiens GN=MTA2 PE=1 SV=1	285000	480000	41400	6.88406	11.5942	11.5942	1.06424	3.34199
MTCH1_HUMAN	2 (2)	68.93	0.00305	10.54	Mitochondrial carrier homolog 1 OS=Homo sapiens GN=MTCH1 PE=1 SV=1	3560000	1860000	338000	10.5325	5.50296	10.5325	1.02253	2.5157
MTX1_HUMAN	3 (3)	83.58	0.000151	21.86	Metaxin-1 OS=Homo sapiens GN=MTX1 PE=1 SV=2	4120000	1630000	189000	21.7989	8.62434	21.7989	1.33844	3.82102
MUC1_HUMAN	4 (4)	152.11	4e-07	7.16	Mucin-1 OS=Homo sapiens GN=MUC1 PE=1 SV=3	34100000	37800000	5280000	6.45833	7.15909	7.15909	0.854858	6.39794
MUC2_HUMAN	11 (10)	324.83	5.74e-05	10.1	Mucin-2 OS=Homo sapiens GN=MUC2 PE=1 SV=2	2450000	24500000	2420000	1.0124	10.124	10.124	1.00535	4.24109
MUC5B_HUMAN	1 (1)	26.94	0.0016	2.75	Mucin-5B OS=Homo sapiens GN=MUC5B PE=1 SV=3	2620000	1460000	4010000	0.653367	0.36409	0.36409	-0.438792	2.79588
MVP_HUMAN	15 (14)	523.41	8.71e-06	2.93	Major vault protein OS=Homo sapiens GN=MVP PE=1 SV=4	47600000	61000000	20800000	2.28846	2.93269	2.93269	0.467267	5.05998
MX1_HUMAN	10 (8)	340.68	8.17e-06	3.15	Interferon-induced GTP-binding protein Mx1 OS=Homo sapiens GN=MX1 PE=1 SV=4	48200000	22600000	15300000	3.15033	1.47712	3.15033	0.498356	5.08778
MXRA5_HUMAN	4 (3)	142.31	1.64e-07	62.69	Matrix-remodeling-associated protein 5 OS=Homo sapiens GN=MXRA5 PE=2 SV=3	9080000	2560000	145000	62.6207	17.6552	62.6207	1.79672	6.78516
MYADM_HUMAN	1 (1)	27.46	0.00889	5.83	Myeloid-associated differentiation marker OS=Homo sapiens GN=MYADM PE=1 SV=2	414000	2410000	1720000	0.240698	1.40116	0.240698	-0.618528	2.0511
MYG1_HUMAN	2 (2)	60.24	0.00627	3.3	UPF0160 protein MYG1, mitochondrial OS=Homo sapiens GN=C12orf10 PE=1 SV=2	924000	1100000	3050000	0.302951	0.360656	0.302951	-0.518628	2.20273
MYH11_HUMAN	42 (25)	1766.19	0.000181	8.09	Myosin-11 OS=Homo sapiens GN=MYH11 PE=1 SV=3	18800000	152000000	18900000	0.994709	8.04233	8.04233	0.905382	3.74232
MYH14_HUMAN	12 (2)	470.76	0.00589	4.54	Myosin-14 OS=Homo sapiens GN=MYH14 PE=1 SV=2	10400000	5680000	25800000	0.403101	0.220155	0.220155	-0.657271	2.22988
MYH9_HUMAN	61 (40)	2774.71	3.37e-08	4.75	Myosin-9 OS=Homo sapiens GN=MYH9 PE=1 SV=4	111000000	306000000	64400000	1.7236	4.75155	4.75155	0.676836	7.47237
MYL6_HUMAN	7 (3)	407.52	5.07e-05	8.2	Myosin light polypeptide 6 OS=Homo sapiens GN=MYL6 PE=1 SV=2	19800000	33700000	4110000	4.81752	8.19951	8.19951	0.913788	4.29499
MYL9_HUMAN	6 (2)	417.56	0.000438	3.65	Myosin regulatory light polypeptide 9 OS=Homo sapiens GN=MYL9 PE=1 SV=4	36500000	44300000	12100000	3.01653	3.66116	3.66116	0.563618	3.35853
MYLK_HUMAN	8 (8)	336.62	0.00341	1.52	Myosin light chain kinase, smooth muscle OS=Homo sapiens GN=MYLK PE=1 SV=4	25800000	28800000	18900000	1.36508	1.52381	1.52381	0.182931	2.46725
MYLK3_HUMAN	1 (1)	17.36	0.00341	2.74	Myosin light chain kinase 3 OS=Homo sapiens GN=MYLK3 PE=2 SV=3	1210000	1750000	3310000	0.365559	0.528701	0.365559	-0.437043	2.46725
MYO1C_HUMAN	4 (4)	110.96	0.000206	2.56	Unconventional myosin-Ic OS=Homo sapiens GN=MYO1C PE=1 SV=4	1260000	3220000	1880000	0.670213	1.71277	0.670213	-0.173787	3.68613
MYOF_HUMAN	15 (13)	455.78	3.7e-05	3.39	Myoferlin OS=Homo sapiens GN=MYOF PE=1 SV=1	17400000	30800000	9090000	1.91419	3.38834	3.38834	0.529987	4.4318
MZB1_HUMAN	3 (3)	114.97	0.000284	15.61	Marginal zone B- and B1-cell-specific protein OS=Homo sapiens GN=MZB1 PE=1 SV=1	7380000	18400000	1180000	6.25424	15.5932	15.5932	1.19294	3.54668
NAA50_HUMAN	2 (2)	42.54	0.01	1.82	N-alpha-acetyltransferase 50 OS=Homo sapiens GN=NAA50 PE=1 SV=1	1560000	2840000	1860000	0.83871	1.52688	1.52688	0.183805	2
NACAM_HUMAN	3 (3)	207.77	0.00258	2.51	Nascent polypeptide-associated complex subunit alpha, muscle-specific form OS=Homo sapiens GN=NACA PE=1 SV=1	14800000	18600000	7430000	1.99192	2.50336	2.50336	0.398524	2.58838
NAGK_HUMAN	6 (5)	233.22	6.16e-06	3.26	N-acetyl-D-glucosamine kinase OS=Homo sapiens GN=NAGK PE=1 SV=4	9430000	9830000	3010000	3.13289	3.26578	3.26578	0.513987	5.21042
NAMPT_HUMAN	7 (4)	284.37	0.01	2.1	Nicotinamide phosphoribosyltransferase OS=Homo sapiens GN=NAMPT PE=1 SV=1	8270000	5530000	11600000	0.712931	0.476724	0.476724	-0.321733	2
NASP_HUMAN	4 (3)	123.64	0.000114	3.05	Nuclear autoantigenic sperm protein OS=Homo sapiens GN=NASP PE=1 SV=2	6950000	4180000	2280000	3.04825	1.83333	3.04825	0.48405	3.9431
NAV3_HUMAN	1 (1)	14.68	0.0081	3.76	Neuron navigator 3 OS=Homo sapiens GN=NAV3 PE=1 SV=3	2680000	3890000	10100000	0.265347	0.385149	0.265347	-0.576187	2.09151
NB5R1_HUMAN	2 (2)	78.37	0.000113	1.9	NADH-cytochrome b5 reductase 1 OS=Homo sapiens GN=CYB5R1 PE=1 SV=1	8710000	16400000	16500000	0.527879	0.993939	0.527879	-0.277466	3.94692
NB5R2_HUMAN	1 (1)	30.47	0.000247	397.45	NADH-cytochrome b5 reductase 2 OS=Homo sapiens GN=CYB5R2 PE=1 SV=1	594000	487000	1493.92	397.612	325.988	397.612	2.59946	3.6073
NB5R3_HUMAN	6 (5)	153.33	6.08e-06	2.05	NADH-cytochrome b5 reductase 3 OS=Homo sapiens GN=CYB5R3 PE=1 SV=3	18500000	24100000	11800000	1.5678	2.04237	2.04237	0.310135	5.2161
NCBP1_HUMAN	1 (1)	19.42	3.24e-06	20.19	Nuclear cap-binding protein subunit 1 OS=Homo sapiens GN=NCBP1 PE=1 SV=1	2380000	1530000	118000	20.1695	12.9661	20.1695	1.30469	5.48945
NCBP2_HUMAN	1 (1)	27.38	0.00233	8.87	Nuclear cap-binding protein subunit 2 OS=Homo sapiens GN=NCBP2 PE=1 SV=1	924000	560000	104000	8.88462	5.38462	8.88462	0.948639	2.63264
NCK1_HUMAN	1 (1)	23.21	0.02	139.86	Cytoplasmic protein NCK1 OS=Homo sapiens GN=NCK1 PE=1 SV=1	2005.46	280000	45700	0.0438832	6.12691	0.0438832	-1.3577	1.69897
NDKA_HUMAN	7 (3)	310.49	8.49e-05	2.8	Nucleoside diphosphate kinase A OS=Homo sapiens GN=NME1 PE=1 SV=1	14300000	40100000	20900000	0.684211	1.91866	1.91866	0.282998	4.07109
NDKB_HUMAN	7 (2)	269.36	0.000413	5.13	Nucleoside diphosphate kinase B OS=Homo sapiens GN=NME2 PE=1 SV=1	11400000	58400000	18200000	0.626374	3.20879	0.626374	-0.203167	3.38405
NDRG1_HUMAN	8 (8)	365.65	0.000951	2.99	Protein NDRG1 OS=Homo sapiens GN=NDRG1 PE=1 SV=1	27400000	33900000	11300000	2.42478	3	3	0.477121	3.02182
NDUA8_HUMAN	1 (1)	37.71	0.01	292.01	NADH dehydrogenase [ubiquinone] 1 alpha subcomplex subunit 8 OS=Homo sapiens GN=NDUFA8 PE=1 SV=3	762000	2610000	8949.08	85.1484	291.65	291.65	2.46486	2
NDUB3_HUMAN	3 (2)	81.54	0.00228	1.65	NADH dehydrogenase [ubiquinone] 1 beta subcomplex subunit 3 OS=Homo sapiens GN=NDUFB3 PE=1 SV=3	4530000	5150000	3120000	1.45192	1.65064	1.65064	0.217653	2.64207
NDUB8_HUMAN	2 (2)	44.8	0.00242	5.65	NADH dehydrogenase [ubiquinone] 1 beta subcomplex subunit 8, mitochondrial OS=Homo sapiens GN=NDUFB8 PE=1 SV=1	5720000	7870000	1390000	4.11511	5.66187	5.66187	0.75296	2.61618
NDUB9_HUMAN	2 (2)	82.11	0.0014	2.95	NADH dehydrogenase [ubiquinone] 1 beta subcomplex subunit 9 OS=Homo sapiens GN=NDUFB9 PE=1 SV=3	5390000	5860000	1980000	2.72222	2.9596	2.9596	0.471232	2.85387
NDUBA_HUMAN	3 (2)	97.74	0.000434	8.84	NADH dehydrogenase [ubiquinone] 1 beta subcomplex subunit 10 OS=Homo sapiens GN=NDUFB10 PE=1 SV=3	3210000	3960000	448000	7.16518	8.83929	8.83929	0.946417	3.36251
NDUS3_HUMAN	6 (6)	235.41	0.00104	2.71	NADH dehydrogenase [ubiquinone] iron-sulfur protein 3, mitochondrial OS=Homo sapiens GN=NDUFS3 PE=1 SV=1	16200000	21800000	8030000	2.01743	2.71482	2.71482	0.433741	2.98297
NDUS7_HUMAN	1 (1)	53.64	0.00209	2.37	NADH dehydrogenase [ubiquinone] iron-sulfur protein 7, mitochondrial OS=Homo sapiens GN=NDUFS7 PE=1 SV=3	2950000	4810000	2030000	1.4532	2.36946	2.36946	0.374649	2.67985
NEK4_HUMAN	1 (1)	13.92	0.00245	3.72	Serine/threonine-protein kinase Nek4 OS=Homo sapiens GN=NEK4 PE=1 SV=2	94900	137000	353000	0.268839	0.388102	0.268839	-0.570508	2.61083
NEUA_HUMAN	4 (4)	156.86	0.00577	1.83	N-acylneuraminate cytidylyltransferase OS=Homo sapiens GN=CMAS PE=1 SV=2	6370000	4810000	3480000	1.83046	1.38218	1.83046	0.26256	2.23882
NH2L1_HUMAN	2 (1)	120.69	0.00145	8.28	NHP2-like protein 1 OS=Homo sapiens GN=SNU13 PE=1 SV=3	1710000	3290000	398000	4.29648	8.26633	8.26633	0.917313	2.83863
NHRF1_HUMAN	7 (6)	223.08	0.000115	2.15	Na(+)/H(+) exchange regulatory cofactor NHE-RF1 OS=Homo sapiens GN=SLC9A3R1 PE=1 SV=4	4640000	6960000	10000000	0.464	0.696	0.464	-0.333482	3.9393
NIBL1_HUMAN	9 (9)	294.77	0.000137	2.84	Niban-like protein 1 OS=Homo sapiens GN=FAM129B PE=1 SV=3	14700000	19800000	6970000	2.10904	2.84075	2.84075	0.453432	3.86328
NIT2_HUMAN	2 (2)	107.03	0.00071	2.51	Omega-amidase NIT2 OS=Homo sapiens GN=NIT2 PE=1 SV=1	4440000	2460000	1770000	2.50847	1.38983	2.50847	0.39941	3.14874
NKAP_HUMAN	1 (1)	15.91	0.00578	3.44	NF-kappa-B-activating protein OS=Homo sapiens GN=NKAP PE=1 SV=1	401000	410000	119000	3.36975	3.44538	3.44538	0.537237	2.23807
NMBR_HUMAN	1 (1)	24.61	0.0056	20.56	Neuromedin-B receptor OS=Homo sapiens GN=NMBR PE=1 SV=2	145000	446000	2980000	0.0486577	0.149664	0.0486577	-1.31285	2.25181
NNMT_HUMAN	4 (3)	124.45	0.00112	3.98	Nicotinamide N-methyltransferase OS=Homo sapiens GN=NNMT PE=1 SV=1	7120000	14100000	3540000	2.0113	3.98305	3.98305	0.600216	2.95078
NONO_HUMAN	7 (4)	241.65	0.00246	1.73	Non-POU domain-containing octamer-binding protein OS=Homo sapiens GN=NONO PE=1 SV=4	20400000	17200000	29800000	0.684564	0.577181	0.577181	-0.238688	2.60906
NP1L1_HUMAN	1 (1)	78	0.000854	3.04	Nucleosome assembly protein 1-like 1 OS=Homo sapiens GN=NAP1L1 PE=1 SV=1	5900000	1970000	1940000	3.04124	1.01546	3.04124	0.48305	3.06854
NPM_HUMAN	9 (7)	550.76	0.00256	1.75	Nucleophosmin OS=Homo sapiens GN=NPM1 PE=1 SV=2	115000000	201000000	194000000	0.592784	1.03608	0.592784	-0.227104	2.59176
NPS3A_HUMAN	1 (1)	29.96	0.000593	7.09	Protein NipSnap homolog 3A OS=Homo sapiens GN=NIPSNAP3A PE=1 SV=2	2400000	2660000	375000	6.4	7.09333	7.09333	0.85085	3.22695
NPT2B_HUMAN	2 (1)	73.73	3.7e-06	9.39	Sodium-dependent phosphate transport protein 2B OS=Homo sapiens GN=SLC34A2 PE=1 SV=3	707000	226000	75300	9.38911	3.00133	9.38911	0.972624	5.4318
NRDC_HUMAN	2 (1)	75.23	2.84e-05	8.25	Nardilysin OS=Homo sapiens GN=NRD1 PE=1 SV=2	354000	724000	2920000	0.121233	0.247945	0.121233	-0.91638	4.54668
NSF_HUMAN	6 (5)	218.13	0.000347	3.02	Vesicle-fusing ATPase OS=Homo sapiens GN=NSF PE=1 SV=3	8280000	10700000	3530000	2.34561	3.03116	3.03116	0.481609	3.45967
NSUN7_HUMAN	1 (1)	23.55	8.19e-05	2.3	Putative methyltransferase NSUN7 OS=Homo sapiens GN=NSUN7 PE=2 SV=4	3000000	6580000	6890000	0.435414	0.955007	0.435414	-0.361098	4.08672
NTF2_HUMAN	3 (3)	120.26	2.02e-05	3.9	Nuclear transport factor 2 OS=Homo sapiens GN=NUTF2 PE=1 SV=1	10800000	20500000	5260000	2.05323	3.89734	3.89734	0.590768	4.69465
NTM1A_HUMAN	1 (1)	51.9	0.02	86.84	N-terminal Xaa-Pro-Lys N-methyltransferase 1 OS=Homo sapiens GN=NTMT1 PE=1 SV=3	452000	292000	5204.95	86.8404	56.1004	86.8404	1.93872	1.69897
NU2M_HUMAN	1 (1)	29.52	0.000825	4.04	NADH-ubiquinone oxidoreductase chain 2 OS=Homo sapiens GN=MT-ND2 PE=1 SV=2	565000	2050000	507000	1.1144	4.04339	4.04339	0.606746	3.08355
NUA4L_HUMAN	1 (1)	22.95	0.00271	3.65	NADH dehydrogenase [ubiquinone] 1 alpha subcomplex subunit 4-like 2 OS=Homo sapiens GN=NDUFA4L2 PE=3 SV=1	702000	1150000	2560000	0.274219	0.449219	0.274219	-0.561903	2.56703
NUCB1_HUMAN	2 (2)	78.64	0.00229	2.3	Nucleobindin-1 OS=Homo sapiens GN=NUCB1 PE=1 SV=4	2720000	5510000	2390000	1.13808	2.30544	2.30544	0.362754	2.64016
NUCKS_HUMAN	1 (1)	72.59	0.00038	2.96	Nuclear ubiquitous casein and cyclin-dependent kinase substrate 1 OS=Homo sapiens GN=NUCKS1 PE=1 SV=1	6300000	4250000	12600000	0.5	0.337302	0.337302	-0.471982	3.42022
NUCL_HUMAN	19 (17)	994.2	0.000183	1.84	Nucleolin OS=Homo sapiens GN=NCL PE=1 SV=3	121000000	174000000	224000000	0.540179	0.776786	0.540179	-0.267463	3.73755
NUDC_HUMAN	7 (7)	260.28	1.2e-05	3.24	Nuclear migration protein nudC OS=Homo sapiens GN=NUDC PE=1 SV=1	20100000	16700000	6200000	3.24194	2.69355	3.24194	0.510804	4.92082
NUDC1_HUMAN	1 (1)	16.79	0.01	11.92	NudC domain-containing protein 1 OS=Homo sapiens GN=NUDCD1 PE=1 SV=2	66400	791000	466000	0.142489	1.69742	0.142489	-0.846218	2
NUDT5_HUMAN	4 (3)	173.72	0.000484	3.36	ADP-sugar pyrophosphatase OS=Homo sapiens GN=NUDT5 PE=1 SV=1	10100000	9930000	33400000	0.302395	0.297305	0.297305	-0.526797	3.31515
O2T35_HUMAN	1 (1)	22.71	0.00249	4.47	Olfactory receptor 2T35 OS=Homo sapiens GN=OR2T35 PE=3 SV=1	560000	2500000	1490000	0.375839	1.67785	0.375839	-0.424998	2.6038
O51G2_HUMAN	1 (1)	15.13	3.33e-05	51.49	Olfactory receptor 51G2 OS=Homo sapiens GN=OR51G2 PE=2 SV=1	4290000	17500000	340000	12.6176	51.4706	51.4706	1.71156	4.47756
OAS3_HUMAN	3 (2)	79.9	0.02	4.47	2'-5'-oligoadenylate synthase 3 OS=Homo sapiens GN=OAS3 PE=1 SV=3	3080000	1640000	689000	4.47025	2.38026	4.47025	0.650331	1.69897
OAT_HUMAN	4 (2)	110.15	0.00374	2.77	Ornithine aminotransferase, mitochondrial OS=Homo sapiens GN=OAT PE=1 SV=1	947000	1240000	2620000	0.36145	0.473282	0.36145	-0.441951	2.42713
OCAD2_HUMAN	3 (3)	113.66	0.00871	1.61	OCIA domain-containing protein 2 OS=Homo sapiens GN=OCIAD2 PE=1 SV=1	12000000	9560000	15400000	0.779221	0.620779	0.620779	-0.207063	2.05998
ODP2_HUMAN	2 (2)	59.05	0.000378	2.57	Dihydrolipoyllysine-residue acetyltransferase component of pyruvate dehydrogenase complex, mitochondrial OS=Homo sapiens GN=DLAT PE=1 SV=3	4420000	2740000	1720000	2.56977	1.59302	2.56977	0.409894	3.42251
ODPA_HUMAN	6 (6)	217.14	0.00735	1.81	Pyruvate dehydrogenase E1 component subunit alpha, somatic form, mitochondrial OS=Homo sapiens GN=PDHA1 PE=1 SV=3	24800000	30900000	17100000	1.45029	1.80702	1.80702	0.256962	2.13371
ODPB_HUMAN	7 (7)	240.01	0.00703	2.38	Pyruvate dehydrogenase E1 component subunit beta, mitochondrial OS=Homo sapiens GN=PDHB PE=1 SV=3	26200000	24100000	11000000	2.38182	2.19091	2.38182	0.376909	2.15304
OGDHL_HUMAN	3 (1)	105.4	0.00396	1.78	2-oxoglutarate dehydrogenase-like, mitochondrial OS=Homo sapiens GN=OGDHL PE=1 SV=3	4490000	6570000	3680000	1.22011	1.78533	1.78533	0.251718	2.4023
OLA1_HUMAN	4 (2)	119.89	0.000589	3.68	Obg-like ATPase 1 OS=Homo sapiens GN=OLA1 PE=1 SV=2	8090000	11000000	2980000	2.71477	3.69128	3.69128	0.567176	3.22988
OSBP1_HUMAN	1 (1)	38.33	0.01	6.72	Oxysterol-binding protein 1 OS=Homo sapiens GN=OSBP PE=1 SV=1	1350000	1170000	202000	6.68317	5.79208	6.68317	0.824982	2
OST48_HUMAN	10 (9)	396.33	0.00175	2.66	Dolichyl-diphosphooligosaccharide--protein glycosyltransferase 48 kDa subunit OS=Homo sapiens GN=DDOST PE=1 SV=4	29500000	37900000	14200000	2.07746	2.66901	2.66901	0.426351	2.75696
OSTM1_HUMAN	1 (1)	14.58	9.33e-05	3.18	Osteopetrosis-associated transmembrane protein 1 OS=Homo sapiens GN=OSTM1 PE=1 SV=1	1560000	4790000	4960000	0.314516	0.965726	0.314516	-0.502357	4.03012
OTUB1_HUMAN	9 (9)	335.71	2.96e-08	3.11	Ubiquitin thioesterase OTUB1 OS=Homo sapiens GN=OTUB1 PE=1 SV=2	17300000	24900000	8000000	2.1625	3.1125	3.1125	0.493109	7.52871
OXLA_HUMAN	3 (2)	81.08	0.000139	48.63	L-amino-acid oxidase OS=Homo sapiens GN=IL4I1 PE=1 SV=1	1800000	697000	37100	48.5175	18.7871	48.5175	1.6859	3.85699
P4HA1_HUMAN	13 (13)	409.51	9.5e-06	2.64	Prolyl 4-hydroxylase subunit alpha-1 OS=Homo sapiens GN=P4HA1 PE=1 SV=2	21500000	24500000	56800000	0.378521	0.431338	0.378521	-0.42191	5.02228
P5CS_HUMAN	2 (1)	90.48	0.00258	1691.88	Delta-1-pyrroline-5-carboxylate synthase OS=Homo sapiens GN=ALDH18A1 PE=1 SV=2	882000	896000	529.65	1665.25	1691.68	1691.68	3.22832	2.58838
P66A_HUMAN	1 (1)	14.45	4.34e-05	1360000	Transcriptional repressor p66-alpha OS=Homo sapiens GN=GATAD2A PE=1 SV=1	129000	67400	0.09	1.43333e+06	748889	1.43333e+06	6.15635	4.36251
PABP1_HUMAN	12 (1)	378.39	0.01	5.45	Polyadenylate-binding protein 1 OS=Homo sapiens GN=PABPC1 PE=1 SV=2	1010000	186000	786000	1.28499	0.236641	0.236641	-0.62591	2
PABP2_HUMAN	3 (3)	107.48	0.00764	2.6	Polyadenylate-binding protein 2 OS=Homo sapiens GN=PABPN1 PE=1 SV=3	10800000	6850000	4160000	2.59615	1.64663	2.59615	0.41433	2.11691
PABP4_HUMAN	6 (1)	194.87	0.00112	2.35	Polyadenylate-binding protein 4 OS=Homo sapiens GN=PABPC4 PE=1 SV=1	1320000	3100000	2360000	0.559322	1.31356	0.559322	-0.252338	2.95078
PADI2_HUMAN	2 (2)	65.97	0.000227	17.45	Protein-arginine deiminase type-2 OS=Homo sapiens GN=PADI2 PE=1 SV=2	140000	2230000	128000	1.09375	17.4219	17.4219	1.24109	3.64397
PAIRB_HUMAN	3 (3)	114.18	0.000107	4.56	Plasminogen activator inhibitor 1 RNA-binding protein OS=Homo sapiens GN=SERBP1 PE=1 SV=2	10500000	5030000	2300000	4.56522	2.18696	4.56522	0.659461	3.97062
PALLD_HUMAN	5 (4)	196.48	0.00677	1.76	Palladin OS=Homo sapiens GN=PALLD PE=1 SV=3	11100000	14800000	8370000	1.32616	1.76822	1.76822	0.247536	2.16941
PANK4_HUMAN	1 (1)	23.51	5.58e-06	20.74	Pantothenate kinase 4 OS=Homo sapiens GN=PANK4 PE=1 SV=1	481000	398000	23200	20.7328	17.1552	20.7328	1.31666	5.25337
PAPS2_HUMAN	1 (1)	18.31	5.18e-05	75.38	Bifunctional 3'-phosphoadenosine 5'-phosphosulfate synthase 2 OS=Homo sapiens GN=PAPSS2 PE=1 SV=2	15100	1130000	255000	0.0592157	4.43137	0.0592157	-1.22756	4.28567
PARK7_HUMAN	10 (9)	435.15	2.58e-05	2.06	Protein deglycase DJ-1 OS=Homo sapiens GN=PARK7 PE=1 SV=2	70200000	123000000	59600000	1.17785	2.06376	2.06376	0.314659	4.58838
PCBP1_HUMAN	11 (6)	635.22	1.7e-05	2.35	Poly(rC)-binding protein 1 OS=Homo sapiens GN=PCBP1 PE=1 SV=2	46100000	56000000	23900000	1.92887	2.3431	2.3431	0.36979	4.76955
PCBP2_HUMAN	9 (3)	454.08	0.00055	1.83	Poly(rC)-binding protein 2 OS=Homo sapiens GN=PCBP2 PE=1 SV=1	9940000	11800000	18200000	0.546154	0.648352	0.546154	-0.262685	3.25964
PCBP3_HUMAN	6 (1)	303.97	0.000321	4.55	Poly(rC)-binding protein 3 OS=Homo sapiens GN=PCBP3 PE=2 SV=2	2780000	5160000	1130000	2.46018	4.56637	4.56637	0.659571	3.49349
PCKGC_HUMAN	1 (1)	65.44	0.01	1.79	Phosphoenolpyruvate carboxykinase, cytosolic [GTP] OS=Homo sapiens GN=PCK1 PE=1 SV=3	1790000	2430000	1360000	1.31618	1.78676	1.78676	0.252067	2
PCKGM_HUMAN	5 (5)	141.16	1.04e-05	1.97	Phosphoenolpyruvate carboxykinase [GTP], mitochondrial OS=Homo sapiens GN=PCK2 PE=1 SV=3	4590000	8250000	4190000	1.09547	1.96897	1.96897	0.29424	4.98297
PCNA_HUMAN	7 (7)	175.88	0.000275	1.81	Proliferating cell nuclear antigen OS=Homo sapiens GN=PCNA PE=1 SV=1	28200000	21200000	15600000	1.80769	1.35897	1.80769	0.257125	3.56067
PCOC1_HUMAN	4 (4)	122.58	4.1e-07	7.5	Procollagen C-endopeptidase enhancer 1 OS=Homo sapiens GN=PCOLCE PE=1 SV=2	5660000	4810000	755000	7.49669	6.37086	7.49669	0.874869	6.38722
PDC6I_HUMAN	12 (10)	364.65	0.00563	1.81	Programmed cell death 6-interacting protein OS=Homo sapiens GN=PDCD6IP PE=1 SV=1	24700000	20500000	13600000	1.81618	1.50735	1.81618	0.259158	2.24949
PDCD4_HUMAN	10 (9)	423.23	0.000234	3.73	Programmed cell death protein 4 OS=Homo sapiens GN=PDCD4 PE=1 SV=2	10300000	24800000	38200000	0.269634	0.649215	0.269634	-0.569226	3.63078
PDCD5_HUMAN	1 (1)	51.73	0.0076	104.37	Programmed cell death protein 5 OS=Homo sapiens GN=PDCD5 PE=1 SV=3	2490000	302000	23800	104.622	12.6891	104.622	2.01962	2.11919
PDCD6_HUMAN	5 (5)	141.29	0.000416	2.88	Programmed cell death protein 6 OS=Homo sapiens GN=PDCD6 PE=1 SV=1	15500000	21500000	7470000	2.07497	2.87818	2.87818	0.459118	3.38091
PDIA1_HUMAN	24 (23)	1230.01	0.000205	1.7	Protein disulfide-isomerase OS=Homo sapiens GN=P4HB PE=1 SV=3	219000000	354000000	371000000	0.590296	0.954178	0.590296	-0.22893	3.68825
PDIA3_HUMAN	20 (20)	1085.67	0.000116	1.74	Protein disulfide-isomerase A3 OS=Homo sapiens GN=PDIA3 PE=1 SV=4	256000000	441000000	445000000	0.575281	0.991011	0.575281	-0.24012	3.93554
PDIA6_HUMAN	12 (11)	687.22	3.63e-05	3.88	Protein disulfide-isomerase A6 OS=Homo sapiens GN=PDIA6 PE=1 SV=1	83900000	130000000	33600000	2.49702	3.86905	3.86905	0.587604	4.44009
PDLI1_HUMAN	6 (6)	142.92	2.31e-08	10.3	PDZ and LIM domain protein 1 OS=Homo sapiens GN=PDLIM1 PE=1 SV=4	19100000	24800000	2400000	7.95833	10.3333	10.3333	1.01424	7.63639
PDLI4_HUMAN	3 (2)	77.15	2.31e-05	7.32	PDZ and LIM domain protein 4 OS=Homo sapiens GN=PDLIM4 PE=1 SV=2	1340000	3980000	544000	2.46324	7.31618	7.31618	0.864284	4.63639
PDLI5_HUMAN	3 (3)	106.9	0.000371	2.45	PDZ and LIM domain protein 5 OS=Homo sapiens GN=PDLIM5 PE=1 SV=5	8200000	9460000	3870000	2.11886	2.44444	2.44444	0.38818	3.43063
PDLI7_HUMAN	6 (6)	174.08	0.000398	4.3	PDZ and LIM domain protein 7 OS=Homo sapiens GN=PDLIM7 PE=1 SV=1	12200000	19500000	4540000	2.68722	4.29515	4.29515	0.632979	3.40012
PDXK_HUMAN	1 (1)	65.28	0.00605	797.47	Pyridoxal kinase OS=Homo sapiens GN=PDXK PE=1 SV=1	2770000	2660000	3474.89	797.148	765.492	797.148	2.90154	2.21824
PEA15_HUMAN	2 (2)	107.49	3.23e-06	3.92	Astrocytic phosphoprotein PEA-15 OS=Homo sapiens GN=PEA15 PE=1 SV=2	11600000	7730000	2960000	3.91892	2.61149	3.91892	0.593166	5.4908
PEBP1_HUMAN	9 (9)	484.58	0.000118	2.14	Phosphatidylethanolamine-binding protein 1 OS=Homo sapiens GN=PEBP1 PE=1 SV=3	204000000	223000000	104000000	1.96154	2.14423	2.14423	0.331272	3.92812
PEPD_HUMAN	5 (3)	175.26	0.00707	4.95	Xaa-Pro dipeptidase OS=Homo sapiens GN=PEPD PE=1 SV=3	982000	4860000	1200000	0.818333	4.05	4.05	0.607455	2.15058
PEPL_HUMAN	16 (14)	503.59	3.95e-05	3.14	Periplakin OS=Homo sapiens GN=PPL PE=1 SV=4	20800000	44200000	14000000	1.48571	3.15714	3.15714	0.499294	4.4034
PERE_HUMAN	5 (3)	209.96	0.00206	4.46	Eosinophil peroxidase OS=Homo sapiens GN=EPX PE=1 SV=2	1330000	5930000	2030000	0.655172	2.92118	0.655172	-0.183644	2.68613
PFD2_HUMAN	1 (1)	26.69	0.00203	1.7	Prefoldin subunit 2 OS=Homo sapiens GN=PFDN2 PE=1 SV=1	1300000	1630000	957000	1.35841	1.70324	1.70324	0.231276	2.6925
PFD3_HUMAN	3 (3)	95.93	0.000257	2.87	Prefoldin subunit 3 OS=Homo sapiens GN=VBP1 PE=1 SV=3	4000000	7580000	2640000	1.51515	2.87121	2.87121	0.458065	3.59007
PFKAL_HUMAN	8 (6)	220.7	0.000381	3.26	ATP-dependent 6-phosphofructokinase, liver type OS=Homo sapiens GN=PFKL PE=1 SV=6	10200000	8600000	3130000	3.25879	2.7476	3.25879	0.513056	3.41908
PGAM1_HUMAN	12 (7)	542.95	0.000228	3.41	Phosphoglycerate mutase 1 OS=Homo sapiens GN=PGAM1 PE=1 SV=2	42700000	70400000	20600000	2.07282	3.41748	3.41748	0.533705	3.64207
PGBM_HUMAN	15 (13)	449.46	0.000346	4.08	Basement membrane-specific heparan sulfate proteoglycan core protein OS=Homo sapiens GN=HSPG2 PE=1 SV=4	21600000	18400000	5280000	4.09091	3.48485	4.09091	0.61182	3.46092
PGM1_HUMAN	18 (18)	748.1	0.00126	1.54	Phosphoglucomutase-1 OS=Homo sapiens GN=PGM1 PE=1 SV=3	47900000	66700000	43400000	1.10369	1.53687	1.53687	0.186636	2.89963
PGM2_HUMAN	5 (5)	177.1	1.13e-05	2.58	Phosphoglucomutase-2 OS=Homo sapiens GN=PGM2 PE=1 SV=4	14600000	19000000	7370000	1.981	2.57802	2.57802	0.411286	4.94692
PGRC1_HUMAN	4 (4)	177.18	0.00031	1.91	Membrane-associated progesterone receptor component 1 OS=Homo sapiens GN=PGRMC1 PE=1 SV=3	18900000	31100000	16300000	1.15951	1.90798	1.90798	0.280573	3.50864
PGRC2_HUMAN	2 (2)	82.72	0.00159	2.1	Membrane-associated progesterone receptor component 2 OS=Homo sapiens GN=PGRMC2 PE=1 SV=1	5550000	11700000	5700000	0.973684	2.05263	2.05263	0.312311	2.7986
PGRP2_HUMAN	2 (2)	67.96	0.000198	9.35	N-acetylmuramoyl-L-alanine amidase OS=Homo sapiens GN=PGLYRP2 PE=1 SV=1	1500000	1110000	161000	9.31677	6.89441	9.31677	0.969265	3.70333
PGS1_HUMAN	7 (6)	356.94	1.07e-05	6.44	Biglycan OS=Homo sapiens GN=BGN PE=1 SV=2	97100000	66600000	15100000	6.43046	4.4106	6.43046	0.808242	4.97062
PGS2_HUMAN	10 (9)	434.1	1.92e-05	4.58	Decorin OS=Homo sapiens GN=DCN PE=1 SV=1	118000000	120000000	26100000	4.52107	4.5977	4.5977	0.662541	4.7167
PHB_HUMAN	8 (6)	360.98	0.00291	1.57	Prohibitin OS=Homo sapiens GN=PHB PE=1 SV=1	24500000	21200000	33400000	0.733533	0.634731	0.634731	-0.197411	2.53611
PHF5A_HUMAN	2 (2)	72.42	0.00115	3.16	PHD finger-like domain-containing protein 5A OS=Homo sapiens GN=PHF5A PE=1 SV=1	4040000	3720000	1280000	3.15625	2.90625	3.15625	0.499171	2.9393
PHLB2_HUMAN	1 (1)	28.82	0.000591	8.61	Pleckstrin homology-like domain family B member 2 OS=Homo sapiens GN=PHLDB2 PE=1 SV=2	154000	1320000	870000	0.177011	1.51724	0.177011	-0.751999	3.22841
PHP14_HUMAN	1 (1)	92.55	0.00178	152.17	14 kDa phosphohistidine phosphatase OS=Homo sapiens GN=PHPT1 PE=1 SV=1	2470000	5530000	36400	67.8571	151.923	151.923	2.18162	2.74958
PHS_HUMAN	2 (2)	79.13	0.000148	5.85	Pterin-4-alpha-carbinolamine dehydratase OS=Homo sapiens GN=PCBD1 PE=1 SV=2	4620000	15000000	2570000	1.79767	5.83658	5.83658	0.766158	3.82974
PIGR_HUMAN	7 (6)	174.97	4.99e-05	7.32	Polymeric immunoglobulin receptor OS=Homo sapiens GN=PIGR PE=1 SV=4	2380000	11300000	1550000	1.53548	7.29032	7.29032	0.862747	4.3019
PIN4_HUMAN	1 (1)	80.82	1.13e-06	23.55	Peptidyl-prolyl cis-trans isomerase NIMA-interacting 4 OS=Homo sapiens GN=PIN4 PE=1 SV=1	1560000	1860000	79100	19.7219	23.5145	23.5145	1.37134	5.94692
PIPNB_HUMAN	2 (1)	62.7	7.71e-05	11.88	Phosphatidylinositol transfer protein beta isoform OS=Homo sapiens GN=PITPNB PE=1 SV=2	152000	1810000	456000	0.333333	3.9693	0.333333	-0.477121	4.11295
PKCB1_HUMAN	1 (1)	29.19	0.00336	6.54	Protein kinase C-binding protein 1 OS=Homo sapiens GN=ZMYND8 PE=1 SV=2	732000	565000	112000	6.53571	5.04464	6.53571	0.815293	2.47366
PKP3_HUMAN	2 (2)	38.73	0.000296	6.85	Plakophilin-3 OS=Homo sapiens GN=PKP3 PE=1 SV=1	326000	1210000	177000	1.84181	6.83616	6.83616	0.834812	3.52871
PLEC_HUMAN	134 (108)	5189.68	2.7e-07	4.79	Plectin OS=Homo sapiens GN=PLEC PE=1 SV=3	281000000	753000000	157000000	1.78981	4.79618	4.79618	0.680895	6.56864
PLIN2_HUMAN	2 (2)	57.85	0.000797	3.88	Perilipin-2 OS=Homo sapiens GN=PLIN2 PE=1 SV=2	1850000	491000	478000	3.87029	1.0272	3.87029	0.587744	3.09854
PLMN_HUMAN	5 (5)	188.58	0.0018	2.83	Plasminogen OS=Homo sapiens GN=PLG PE=1 SV=2	25400000	8990000	10900000	2.33028	0.824771	2.33028	0.367407	2.74473
PLOD1_HUMAN	2 (1)	48.88	0.02	4.47	Procollagen-lysine,2-oxoglutarate 5-dioxygenase 1 OS=Homo sapiens GN=PLOD1 PE=1 SV=2	1100000	1060000	247000	4.45344	4.2915	4.45344	0.648696	1.69897
PLOD3_HUMAN	4 (3)	126.7	0.00196	1.83	Procollagen-lysine,2-oxoglutarate 5-dioxygenase 3 OS=Homo sapiens GN=PLOD3 PE=1 SV=1	4950000	6030000	3300000	1.5	1.82727	1.82727	0.261803	2.70774
PLS1_HUMAN	2 (2)	65.66	0.00249	3.48	Phospholipid scramblase 1 OS=Homo sapiens GN=PLSCR1 PE=1 SV=1	4940000	3580000	1420000	3.47887	2.52113	3.47887	0.541439	2.6038
PLSL_HUMAN	24 (18)	971.42	1.1e-06	5.08	Plastin-2 OS=Homo sapiens GN=LCP1 PE=1 SV=6	81100000	131000000	25800000	3.14341	5.07752	5.07752	0.705652	5.95861
PLST_HUMAN	18 (11)	652.12	1.19e-05	3.46	Plastin-3 OS=Homo sapiens GN=PLS3 PE=1 SV=4	24800000	33700000	9730000	2.54882	3.46351	3.46351	0.539517	4.92445
PLXB2_HUMAN	1 (1)	39.12	0.00716	12.86	Plexin-B2 OS=Homo sapiens GN=PLXNB2 PE=1 SV=3	321000	529000	41100	7.81022	12.871	12.871	1.10961	2.14509
PML_HUMAN	9 (7)	376.73	0.00516	4.02	Protein PML OS=Homo sapiens GN=PML PE=1 SV=3	12400000	21000000	5220000	2.37548	4.02299	4.02299	0.604549	2.28735
PMM2_HUMAN	4 (3)	105.46	0.00157	3.22	Phosphomannomutase 2 OS=Homo sapiens GN=PMM2 PE=1 SV=1	6020000	10700000	3330000	1.80781	3.21321	3.21321	0.50694	2.8041
PMVK_HUMAN	1 (1)	26.58	0.000143	9.74	Phosphomevalonate kinase OS=Homo sapiens GN=PMVK PE=1 SV=3	595000	5800000	2200000	0.270455	2.63636	0.270455	-0.567906	3.84466
PNCB_HUMAN	2 (2)	123.7	3.28e-05	8.89	Nicotinate phosphoribosyltransferase OS=Homo sapiens GN=NAPRT PE=1 SV=2	1730000	14600000	1640000	1.05488	8.90244	8.90244	0.949509	4.48413
PNPH_HUMAN	3 (3)	54.81	2.75e-08	23.68	Purine nucleoside phosphorylase OS=Homo sapiens GN=PNP PE=1 SV=2	3240000	6050000	256000	12.6562	23.6328	23.6328	1.37352	7.56067
PNPO_HUMAN	2 (2)	29.81	0.000394	1.94	Pyridoxine-5'-phosphate oxidase OS=Homo sapiens GN=PNPO PE=1 SV=1	4280000	8280000	5460000	0.783883	1.51648	1.51648	0.180838	3.4045
POSTN_HUMAN	15 (12)	620.63	7.73e-06	10.57	Periostin OS=Homo sapiens GN=POSTN PE=1 SV=2	68100000	63300000	6450000	10.5581	9.81395	10.5581	1.02359	5.11182
PP1A_HUMAN	5 (1)	218.43	0.000213	4.61	Serine/threonine-protein phosphatase PP1-alpha catalytic subunit OS=Homo sapiens GN=PPP1CA PE=1 SV=1	938000	4330000	1140000	0.822807	3.79825	3.79825	0.579583	3.67162
PP4R1_HUMAN	1 (1)	25.27	0.02	3.74	Serine/threonine-protein phosphatase 4 regulatory subunit 1 OS=Homo sapiens GN=PPP4R1 PE=1 SV=1	286000	305000	81600	3.5049	3.73775	3.73775	0.57261	1.69897
PPAC_HUMAN	4 (4)	224.72	1.79e-06	12.56	Low molecular weight phosphotyrosine protein phosphatase OS=Homo sapiens GN=ACP1 PE=1 SV=3	4190000	18600000	1480000	2.83108	12.5676	12.5676	1.09925	5.74715
PPCE_HUMAN	2 (1)	80.46	0.02	474.29	Prolyl endopeptidase OS=Homo sapiens GN=PREP PE=1 SV=2	308000	233000	648.88	474.664	359.08	474.664	2.67639	1.69897
PPCS_HUMAN	1 (1)	23.48	0.02	92.01	Phosphopantothenate--cysteine ligase OS=Homo sapiens GN=PPCS PE=1 SV=2	483000	431000	5247.73	92.0398	82.1307	92.0398	1.96398	1.69897
PPIA_HUMAN	12 (8)	650.6	0.000138	1.94	Peptidyl-prolyl cis-trans isomerase A OS=Homo sapiens GN=PPIA PE=1 SV=2	298000000	579000000	327000000	0.911315	1.77064	1.77064	0.248131	3.86012
PPIB_HUMAN	14 (11)	567.45	0.000241	1.84	Peptidyl-prolyl cis-trans isomerase B OS=Homo sapiens GN=PPIB PE=1 SV=2	102000000	125000000	188000000	0.542553	0.664894	0.542553	-0.265558	3.61798
PPM1G_HUMAN	2 (2)	63.23	0.000403	3.4	Protein phosphatase 1G OS=Homo sapiens GN=PPM1G PE=1 SV=1	2380000	1800000	699000	3.40486	2.57511	3.40486	0.5321	3.39469
PPME1_HUMAN	1 (1)	47.31	0.00902	5.45	Protein phosphatase methylesterase 1 OS=Homo sapiens GN=PPME1 PE=1 SV=3	732000	583000	134000	5.46269	4.35075	5.46269	0.737406	2.04479
PPP5_HUMAN	2 (1)	51.48	0.00142	15.27	Serine/threonine-protein phosphatase 5 OS=Homo sapiens GN=PPP5C PE=1 SV=1	1070000	1160000	75800	14.1161	15.3034	15.3034	1.18479	2.84771
PRC2C_HUMAN	1 (1)	16.25	0.01	3.32	Protein PRRC2C OS=Homo sapiens GN=PRRC2C PE=1 SV=4	594000	411000	179000	3.31844	2.29609	3.31844	0.520933	2
PRDX2_HUMAN	9 (8)	530.4	0.00106	1.83	Peroxiredoxin-2 OS=Homo sapiens GN=PRDX2 PE=1 SV=5	166000000	201000000	303000000	0.547855	0.663366	0.547855	-0.261335	2.97469
PRDX3_HUMAN	8 (7)	305.56	0.000798	1.91	Thioredoxin-dependent peroxide reductase, mitochondrial OS=Homo sapiens GN=PRDX3 PE=1 SV=3	37100000	70800000	59000000	0.628814	1.2	0.628814	-0.201478	3.098
PRDX5_HUMAN	7 (7)	390.16	9.27e-08	3.49	Peroxiredoxin-5, mitochondrial OS=Homo sapiens GN=PRDX5 PE=1 SV=4	78300000	225000000	64500000	1.21395	3.48837	3.48837	0.542623	7.03292
PRELP_HUMAN	6 (6)	207.28	2.8e-05	5.08	Prolargin OS=Homo sapiens GN=PRELP PE=1 SV=1	51600000	52300000	10300000	5.00971	5.07767	5.07767	0.705664	4.55284
PROF1_HUMAN	8 (7)	601.47	0.000208	2.15	Profilin-1 OS=Homo sapiens GN=PFN1 PE=1 SV=2	161000000	237000000	111000000	1.45045	2.13514	2.13514	0.329425	3.68194
PROF2_HUMAN	2 (2)	42.43	0.02	1.59	Profilin-2 OS=Homo sapiens GN=PFN2 PE=1 SV=3	9280000	11100000	6990000	1.32761	1.58798	1.58798	0.200846	1.69897
PROS_HUMAN	2 (2)	56.59	0.000466	4.72	Vitamin K-dependent protein S OS=Homo sapiens GN=PROS1 PE=1 SV=1	1650000	983000	350000	4.71429	2.80857	4.71429	0.673416	3.33161
PROSC_HUMAN	2 (2)	61.97	1.97e-07	37.75	Proline synthase co-transcribed bacterial homolog protein OS=Homo sapiens GN=PROSC PE=1 SV=1	788000	1540000	40900	19.2665	37.6528	37.6528	1.5758	6.70553
PRP8_HUMAN	10 (7)	242.32	9.13e-05	3.56	Pre-mRNA-processing-splicing factor 8 OS=Homo sapiens GN=PRPF8 PE=1 SV=2	9240000	10800000	3040000	3.03947	3.55263	3.55263	0.55055	4.03953
PRPS1_HUMAN	2 (2)	49.15	4.94e-05	40.14	Ribose-phosphate pyrophosphokinase 1 OS=Homo sapiens GN=PRPS1 PE=1 SV=2	3320000	3040000	82800	40.0966	36.715	40.0966	1.60311	4.30627
PRS10_HUMAN	5 (4)	197.68	0.00912	2.07	26S protease regulatory subunit 10B OS=Homo sapiens GN=PSMC6 PE=1 SV=1	6750000	6720000	3250000	2.07692	2.06769	2.07692	0.31742	2.04001
PRS6A_HUMAN	6 (6)	218.16	0.00103	1.93	26S protease regulatory subunit 6A OS=Homo sapiens GN=PSMC3 PE=1 SV=3	6940000	13400000	8480000	0.818396	1.58019	1.58019	0.198709	2.98716
PRS7_HUMAN	2 (1)	61.41	1.14e-08	3030000	26S protease regulatory subunit 7 OS=Homo sapiens GN=PSMC2 PE=1 SV=3	679000	1350000	0.45	1.50889e+06	3000000	3000000	6.47712	7.9431
PSA_HUMAN	18 (9)	662.19	0.000223	2.14	Puromycin-sensitive aminopeptidase OS=Homo sapiens GN=NPEPPS PE=1 SV=2	11900000	25500000	14200000	0.838028	1.79577	1.79577	0.254252	3.6517
PSA1_HUMAN	8 (5)	295.48	0.000147	1.67	Proteasome subunit alpha type-1 OS=Homo sapiens GN=PSMA1 PE=1 SV=1	17600000	14200000	10500000	1.67619	1.35238	1.67619	0.224323	3.83268
PSA2_HUMAN	4 (3)	126.18	0.0013	1.56	Proteasome subunit alpha type-2 OS=Homo sapiens GN=PSMA2 PE=1 SV=2	11000000	10800000	16800000	0.654762	0.642857	0.642857	-0.191886	2.88606
PSA5_HUMAN	8 (6)	352.22	1.27e-06	2.27	Proteasome subunit alpha type-5 OS=Homo sapiens GN=PSMA5 PE=1 SV=3	43200000	30300000	19100000	2.26178	1.58639	2.26178	0.35445	5.8962
PSA6_HUMAN	6 (5)	313.72	1.24e-05	2.74	Proteasome subunit alpha type-6 OS=Homo sapiens GN=PSMA6 PE=1 SV=1	37400000	32800000	13600000	2.75	2.41176	2.75	0.439333	4.90658
PSB1_HUMAN	6 (6)	166.91	0.00282	2.16	Proteasome subunit beta type-1 OS=Homo sapiens GN=PSMB1 PE=1 SV=2	41000000	56100000	26000000	1.57692	2.15769	2.15769	0.33399	2.54975
PSB2_HUMAN	5 (4)	153.76	0.00346	2.67	Proteasome subunit beta type-2 OS=Homo sapiens GN=PSMB2 PE=1 SV=1	50400000	77000000	28900000	1.74394	2.66436	2.66436	0.425593	2.46092
PSB6_HUMAN	3 (3)	111.79	0.00503	2.37	Proteasome subunit beta type-6 OS=Homo sapiens GN=PSMB6 PE=1 SV=4	2830000	6220000	6700000	0.422388	0.928358	0.422388	-0.374288	2.29843
PSB8_HUMAN	3 (3)	171.55	6.75e-05	2.57	Proteasome subunit beta type-8 OS=Homo sapiens GN=PSMB8 PE=1 SV=3	13900000	14000000	5430000	2.55985	2.57827	2.57827	0.411328	4.1707
PSB9_HUMAN	3 (3)	202.1	0.000288	4.32	Proteasome subunit beta type-9 OS=Homo sapiens GN=PSMB9 PE=1 SV=2	10700000	12600000	2930000	3.65188	4.30034	4.30034	0.633503	3.54061
PSMD3_HUMAN	3 (3)	95.52	0.000217	2.79	26S proteasome non-ATPase regulatory subunit 3 OS=Homo sapiens GN=PSMD3 PE=1 SV=2	7660000	7210000	2750000	2.78545	2.62182	2.78545	0.444896	3.66354
PSMD8_HUMAN	1 (1)	18.24	0.01	3.55	26S proteasome non-ATPase regulatory subunit 8 OS=Homo sapiens GN=PSMD8 PE=1 SV=2	2540000	7210000	2030000	1.25123	3.55172	3.55172	0.550439	2
PSME1_HUMAN	10 (8)	446.6	7.89e-06	3.1	Proteasome activator complex subunit 1 OS=Homo sapiens GN=PSME1 PE=1 SV=1	71300000	80100000	25800000	2.76357	3.10465	3.10465	0.492013	5.10292
PSME2_HUMAN	8 (6)	371.14	0.00147	2.1	Proteasome activator complex subunit 2 OS=Homo sapiens GN=PSME2 PE=1 SV=4	60400000	56400000	28800000	2.09722	1.95833	2.09722	0.321644	2.83268
PTBP1_HUMAN	12 (8)	427.09	0.0022	1.65	Polypyrimidine tract-binding protein 1 OS=Homo sapiens GN=PTBP1 PE=1 SV=1	28400000	28700000	17400000	1.63218	1.64943	1.64943	0.217333	2.65758
PTGIS_HUMAN	6 (6)	274.37	2.99e-08	5.5	Prostacyclin synthase OS=Homo sapiens GN=PTGIS PE=1 SV=1	14200000	9230000	50800000	0.279528	0.181693	0.181693	-0.740662	7.52433
PTGR1_HUMAN	3 (2)	84.75	1.85e-06	5.46	Prostaglandin reductase 1 OS=Homo sapiens GN=PTGR1 PE=1 SV=2	2320000	1460000	425000	5.45882	3.43529	5.45882	0.737099	5.73283
PTK7_HUMAN	8 (7)	189.55	0.01	1.7	Inactive tyrosine-protein kinase 7 OS=Homo sapiens GN=PTK7 PE=1 SV=2	6490000	8090000	4760000	1.36345	1.69958	1.69958	0.230342	2
PTMA_HUMAN	3 (3)	350.39	0.000443	5.1	Prothymosin alpha OS=Homo sapiens GN=PTMA PE=1 SV=2	57400000	13800000	70600000	0.813031	0.195467	0.195467	-0.708926	3.3536
PTN11_HUMAN	1 (1)	24.7	0.0049	7.35	Tyrosine-protein phosphatase non-receptor type 11 OS=Homo sapiens GN=PTPN11 PE=1 SV=2	1100000	2930000	399000	2.75689	7.34336	7.34336	0.865895	2.3098
PTN6_HUMAN	3 (3)	54.05	0.000485	22.7	Tyrosine-protein phosphatase non-receptor type 6 OS=Homo sapiens GN=PTPN6 PE=1 SV=1	2010000	2440000	107000	18.785	22.8037	22.8037	1.35801	3.31426
PTPA_HUMAN	4 (4)	99.88	6.48e-05	3	Serine/threonine-protein phosphatase 2A activator OS=Homo sapiens GN=PPP2R4 PE=1 SV=3	9100000	9810000	3270000	2.78287	3	3	0.477121	4.18842
PTPRF_HUMAN	2 (2)	43.82	0.00554	7.81	Receptor-type tyrosine-protein phosphatase F OS=Homo sapiens GN=PTPRF PE=1 SV=2	990000	843000	127000	7.79528	6.6378	7.79528	0.891831	2.25649
PUF60_HUMAN	2 (2)	52.81	0.00149	2.82	Poly(U)-binding-splicing factor PUF60 OS=Homo sapiens GN=PUF60 PE=1 SV=1	4030000	3410000	1430000	2.81818	2.38462	2.81818	0.449969	2.82681
PUR2_HUMAN	4 (4)	202.27	0.01	2.34	Trifunctional purine biosynthetic protein adenosine-3 OS=Homo sapiens GN=GART PE=1 SV=1	5250000	5950000	2540000	2.06693	2.34252	2.34252	0.369683	2
PUR6_HUMAN	10 (7)	323.56	0.00743	2.04	Multifunctional protein ADE2 OS=Homo sapiens GN=PAICS PE=1 SV=3	19000000	30500000	15000000	1.26667	2.03333	2.03333	0.308209	2.12901
PUR9_HUMAN	10 (9)	325.22	0.000164	2.07	Bifunctional purine biosynthesis protein PURH OS=Homo sapiens GN=ATIC PE=1 SV=3	11000000	16000000	7730000	1.42303	2.06986	2.06986	0.31594	3.78516
PURA_HUMAN	3 (1)	63.62	0.000123	1.95	Transcriptional activator protein Pur-alpha OS=Homo sapiens GN=PURA PE=1 SV=2	1230000	2310000	2390000	0.514644	0.966527	0.514644	-0.288493	3.91009
PURA2_HUMAN	3 (3)	97.58	0.00372	10.68	Adenylosuccinate synthetase isozyme 2 OS=Homo sapiens GN=ADSS PE=1 SV=3	2090000	2250000	211000	9.90521	10.6635	10.6635	1.0279	2.42946
PURB_HUMAN	3 (2)	97.8	7.77e-05	12.92	Transcriptional activator protein Pur-beta OS=Homo sapiens GN=PURB PE=1 SV=3	1670000	1980000	153000	10.915	12.9412	12.9412	1.11197	4.10958
PXDN_HUMAN	8 (5)	205.79	0.000685	2.19	Peroxidasin homolog OS=Homo sapiens GN=PXDN PE=1 SV=2	5890000	8450000	12900000	0.456589	0.655039	0.456589	-0.340474	3.16431
QCR1_HUMAN	8 (6)	275.19	0.000518	3.05	Cytochrome b-c1 complex subunit 1, mitochondrial OS=Homo sapiens GN=UQCRC1 PE=1 SV=3	18600000	18200000	6100000	3.04918	2.98361	3.04918	0.484183	3.28567
QCR2_HUMAN	6 (6)	246.74	2.41e-06	4.78	Cytochrome b-c1 complex subunit 2, mitochondrial OS=Homo sapiens GN=UQCRC2 PE=1 SV=3	12900000	19300000	4040000	3.19307	4.77723	4.77723	0.679176	5.61798
QCR6_HUMAN	1 (1)	41.42	0.00217	1.59	Cytochrome b-c1 complex subunit 6, mitochondrial OS=Homo sapiens GN=UQCRH PE=1 SV=2	2920000	3560000	4650000	0.627957	0.765591	0.627957	-0.20207	2.66354
QCR7_HUMAN	4 (4)	143.68	2.71e-06	2.73	Cytochrome b-c1 complex subunit 7 OS=Homo sapiens GN=UQCRB PE=1 SV=2	16400000	27600000	10100000	1.62376	2.73267	2.73267	0.436588	5.56703
QOR_HUMAN	5 (4)	154.1	1.33e-05	5.14	Quinone oxidoreductase OS=Homo sapiens GN=CRYZ PE=1 SV=1	13800000	10800000	2680000	5.14925	4.02985	5.14925	0.711744	4.87615
QORX_HUMAN	1 (1)	29.49	0.00839	15.47	Quinone oxidoreductase PIG3 OS=Homo sapiens GN=TP53I3 PE=1 SV=2	651000	3040000	197000	3.30457	15.4315	15.4315	1.18841	2.07624
RAB1B_HUMAN	9 (2)	456.56	0.01	1.7	Ras-related protein Rab-1B OS=Homo sapiens GN=RAB1B PE=1 SV=1	7930000	9960000	5870000	1.35094	1.69676	1.69676	0.229621	2
RAB21_HUMAN	3 (2)	115.56	0.000147	3.24	Ras-related protein Rab-21 OS=Homo sapiens GN=RAB21 PE=1 SV=3	4370000	3590000	1350000	3.23704	2.65926	3.23704	0.510148	3.83268
RAB5C_HUMAN	4 (3)	201.74	4.77e-06	5.12	Ras-related protein Rab-5C OS=Homo sapiens GN=RAB5C PE=1 SV=2	7320000	10600000	2060000	3.5534	5.14563	5.14563	0.711439	5.32148
RAB6A_HUMAN	5 (2)	169.1	0.000963	2.43	Ras-related protein Rab-6A OS=Homo sapiens GN=RAB6A PE=1 SV=3	5370000	7140000	2940000	1.82653	2.42857	2.42857	0.385351	3.01637
RAB6B_HUMAN	4 (1)	115.35	0.000169	3.08	Ras-related protein Rab-6B OS=Homo sapiens GN=RAB6B PE=1 SV=1	650000	1370000	444000	1.46396	3.08559	3.08559	0.489338	3.77211
RAB7A_HUMAN	9 (8)	390.15	0.00277	2.06	Ras-related protein Rab-7a OS=Homo sapiens GN=RAB7A PE=1 SV=1	29700000	45500000	22000000	1.35	2.06818	2.06818	0.315589	2.55752
RABP2_HUMAN	6 (4)	314.89	0.000611	1.63	Cellular retinoic acid-binding protein 2 OS=Homo sapiens GN=CRABP2 PE=1 SV=2	47700000	76900000	47100000	1.01274	1.6327	1.6327	0.212905	3.21396
RAC2_HUMAN	6 (3)	205.08	0.00012	2.86	Ras-related C3 botulinum toxin substrate 2 OS=Homo sapiens GN=RAC2 PE=1 SV=1	5410000	9580000	3350000	1.61493	2.8597	2.8597	0.456321	3.92082
RAGP1_HUMAN	4 (3)	170.91	0.00321	2.35	Ran GTPase-activating protein 1 OS=Homo sapiens GN=RANGAP1 PE=1 SV=1	2620000	2410000	1110000	2.36036	2.17117	2.36036	0.372978	2.49349
RAP2B_HUMAN	1 (1)	67.36	0.0018	5298.2	Ras-related protein Rap-2b OS=Homo sapiens GN=RAP2B PE=1 SV=1	352000	1460000	274.79	1280.98	5313.15	5313.15	3.72535	2.74473
RAVR1_HUMAN	1 (1)	74.6	0.00196	4.95	Ribonucleoprotein PTB-binding 1 OS=Homo sapiens GN=RAVER1 PE=1 SV=1	847000	171000	577000	1.46794	0.29636	0.29636	-0.52818	2.70774
RB11B_HUMAN	6 (1)	191.25	0.000505	79.02	Ras-related protein Rab-11B OS=Homo sapiens GN=RAB11B PE=1 SV=4	27500	2180000	1310000	0.0209924	1.66412	0.0209924	-1.67794	3.29671
RBBP4_HUMAN	6 (2)	218.48	0.01	1.56	Histone-binding protein RBBP4 OS=Homo sapiens GN=RBBP4 PE=1 SV=3	2000000	2400000	1540000	1.2987	1.55844	1.55844	0.192691	2
RBM39_HUMAN	4 (2)	120.07	0.00146	3.85	RNA-binding protein 39 OS=Homo sapiens GN=RBM39 PE=1 SV=2	1420000	2620000	680000	2.08824	3.85294	3.85294	0.585792	2.83565
RBMX_HUMAN	6 (3)	171.81	0.000304	2.83	RNA-binding motif protein, X chromosome OS=Homo sapiens GN=RBMX PE=1 SV=3	6830000	7380000	19300000	0.353886	0.382383	0.353886	-0.451137	3.51713
RCC2_HUMAN	3 (3)	136.19	0.000376	3.38	Protein RCC2 OS=Homo sapiens GN=RCC2 PE=1 SV=2	12400000	14900000	4410000	2.81179	3.37868	3.37868	0.528748	3.42481
RCN2_HUMAN	2 (2)	75.73	1.77e-05	7.41	Reticulocalbin-2 OS=Homo sapiens GN=RCN2 PE=1 SV=1	5780000	1410000	780000	7.41026	1.80769	7.41026	0.869833	4.75203
RCN3_HUMAN	4 (3)	207.37	0.000123	45.67	Reticulocalbin-3 OS=Homo sapiens GN=RCN3 PE=1 SV=1	8110000	7730000	178000	45.5618	43.427	45.5618	1.6586	3.91009
RD23A_HUMAN	4 (2)	109.89	0.00282	2.22	UV excision repair protein RAD23 homolog A OS=Homo sapiens GN=RAD23A PE=1 SV=1	2510000	5420000	2440000	1.02869	2.22131	2.22131	0.346609	2.54975
RD23B_HUMAN	7 (4)	206.13	0.00922	2.76	UV excision repair protein RAD23 homolog B OS=Homo sapiens GN=RAD23B PE=1 SV=1	8170000	21200000	7690000	1.06242	2.75683	2.75683	0.44041	2.03527
REEP5_HUMAN	1 (1)	43.58	0.00442	1.75	Receptor expression-enhancing protein 5 OS=Homo sapiens GN=REEP5 PE=1 SV=3	6710000	8120000	11700000	0.573504	0.694017	0.573504	-0.241463	2.35458
REG4_HUMAN	1 (1)	21.7	5.16e-05	36.86	Regenerating islet-derived protein 4 OS=Homo sapiens GN=REG4 PE=1 SV=1	106000	2650000	71800	1.47632	36.9081	36.9081	1.56712	4.28735
RENI_HUMAN	2 (1)	56.56	0.00311	19.68	Renin OS=Homo sapiens GN=REN PE=1 SV=1	461000	241000	4750000	0.0970526	0.0507368	0.0507368	-1.29468	2.50724
RENT1_HUMAN	1 (1)	14.23	0.01	2.77	Regulator of nonsense transcripts 1 OS=Homo sapiens GN=UPF1 PE=1 SV=2	1460000	529000	593000	2.46206	0.892074	2.46206	0.391298	2
RFA1_HUMAN	1 (1)	29.14	0.005	4.38	Replication protein A 70 kDa DNA-binding subunit OS=Homo sapiens GN=RPA1 PE=1 SV=2	1630000	1410000	372000	4.38172	3.79032	4.38172	0.641645	2.30103
RGN_HUMAN	1 (1)	16.24	7.58e-09	8.25	Regucalcin OS=Homo sapiens GN=RGN PE=1 SV=1	3320000	608000	5010000	0.662675	0.121357	0.121357	-0.915934	8.12033
RHG01_HUMAN	4 (3)	117.57	0.000267	2.37	Rho GTPase-activating protein 1 OS=Homo sapiens GN=ARHGAP1 PE=1 SV=1	7420000	17600000	9250000	0.802162	1.9027	1.9027	0.279371	3.57349
RHG36_HUMAN	1 (1)	15.67	0.000159	10.38	Rho GTPase-activating protein 36 OS=Homo sapiens GN=ARHGAP36 PE=2 SV=1	101000	494000	1050000	0.0961905	0.470476	0.0961905	-1.01687	3.7986
RHOA_HUMAN	8 (2)	315.67	6.67e-06	2.28	Transforming protein RhoA OS=Homo sapiens GN=RHOA PE=1 SV=1	12700000	14800000	6480000	1.95988	2.28395	2.28395	0.358687	5.17587
RHOC_HUMAN	6 (1)	263.03	5.49e-06	20.12	Rho-related GTP-binding protein RhoC OS=Homo sapiens GN=RHOC PE=1 SV=1	4490000	5060000	252000	17.8175	20.0794	20.0794	1.30275	5.26043
RL12_HUMAN	7 (5)	422.62	0.00262	1.87	60S ribosomal protein L12 OS=Homo sapiens GN=RPL12 PE=1 SV=1	30100000	56400000	45100000	0.667406	1.25055	0.667406	-0.17561	2.5817
RL13A_HUMAN	6 (4)	172.9	0.01	2.55	60S ribosomal protein L13a OS=Homo sapiens GN=RPL13A PE=1 SV=2	12100000	4730000	7640000	1.58377	0.61911	1.58377	0.199692	2
RL14_HUMAN	4 (4)	139.52	0.00246	1.81	60S ribosomal protein L14 OS=Homo sapiens GN=RPL14 PE=1 SV=4	92300000	76000000	51100000	1.80626	1.48728	1.80626	0.256781	2.60906
RL27A_HUMAN	3 (3)	157.67	0.000429	2.04	60S ribosomal protein L27a OS=Homo sapiens GN=RPL27A PE=1 SV=2	16600000	33800000	17700000	0.937853	1.9096	1.9096	0.280943	3.36754
RL29_HUMAN	1 (1)	45.55	3.1e-05	13.53	60S ribosomal protein L29 OS=Homo sapiens GN=RPL29 PE=1 SV=2	4730000	350000	3860000	1.22539	0.0906736	0.0906736	-1.04252	4.50864
RL30_HUMAN	4 (4)	139.94	0.00357	2.5	60S ribosomal protein L30 OS=Homo sapiens GN=RPL30 PE=1 SV=2	11200000	11500000	4620000	2.42424	2.48918	2.48918	0.396056	2.44733
RL31_HUMAN	3 (3)	159.6	0.00233	1.82	60S ribosomal protein L31 OS=Homo sapiens GN=RPL31 PE=1 SV=1	19100000	12000000	21900000	0.872146	0.547945	0.547945	-0.261263	2.63264
RL32_HUMAN	4 (3)	195.3	0.00641	2.49	60S ribosomal protein L32 OS=Homo sapiens GN=RPL32 PE=1 SV=2	10600000	26300000	20700000	0.512077	1.27053	0.512077	-0.290664	2.19314
RL35_HUMAN	3 (3)	108.59	0.01	1.57	60S ribosomal protein L35 OS=Homo sapiens GN=RPL35 PE=1 SV=2	10700000	16800000	16800000	0.636905	1	0.636905	-0.195926	2
RL35A_HUMAN	3 (3)	105.54	0.00239	3.45	60S ribosomal protein L35a OS=Homo sapiens GN=RPL35A PE=1 SV=2	4540000	7140000	2070000	2.19324	3.44928	3.44928	0.537728	2.6216
RL36A_HUMAN	1 (1)	20.91	0.000308	3.64	60S ribosomal protein L36a OS=Homo sapiens GN=RPL36A PE=1 SV=2	4230000	1160000	1260000	3.35714	0.920635	3.35714	0.52597	3.51145
RL37A_HUMAN	1 (1)	32.83	4.8e-07	7.63	60S ribosomal protein L37a OS=Homo sapiens GN=RPL37A PE=1 SV=2	1790000	3720000	13600000	0.131618	0.273529	0.131618	-0.880686	6.31876
RL38_HUMAN	2 (2)	70.44	6.51e-05	5.08	60S ribosomal protein L38 OS=Homo sapiens GN=RPL38 PE=1 SV=2	964000	4530000	4900000	0.196735	0.92449	0.196735	-0.706119	4.18642
RL6_HUMAN	6 (5)	259.93	0.000447	1.55	60S ribosomal protein L6 OS=Homo sapiens GN=RPL6 PE=1 SV=3	53900000	56100000	83600000	0.644737	0.671053	0.644737	-0.190618	3.34969
RL7_HUMAN	13 (9)	445.23	4.31e-05	1.81	60S ribosomal protein L7 OS=Homo sapiens GN=RPL7 PE=1 SV=1	37500000	63500000	68000000	0.551471	0.933824	0.551471	-0.258478	4.36552
RL8_HUMAN	6 (6)	157.47	7.62e-05	2.4	60S ribosomal protein L8 OS=Homo sapiens GN=RPL8 PE=1 SV=2	12500000	6610000	15900000	0.786164	0.415723	0.415723	-0.381196	4.11805
RLA0_HUMAN	9 (3)	424.55	0.01	2	60S acidic ribosomal protein P0 OS=Homo sapiens GN=RPLP0 PE=1 SV=1	14500000	29000000	18400000	0.788043	1.57609	1.57609	0.19758	2
RLA2_HUMAN	5 (4)	249.6	0.000161	1.64	60S acidic ribosomal protein P2 OS=Homo sapiens GN=RPLP2 PE=1 SV=1	67000000	98700000	110000000	0.609091	0.897273	0.609091	-0.215318	3.79317
RN213_HUMAN	10 (4)	261.89	0.00237	2.46	E3 ubiquitin-protein ligase RNF213 OS=Homo sapiens GN=RNF213 PE=1 SV=3	2810000	2840000	1160000	2.42241	2.44828	2.44828	0.38886	2.62525
RNAS2_HUMAN	1 (1)	27.99	3.3e-05	20.21	Non-secretory ribonuclease OS=Homo sapiens GN=RNASE2 PE=1 SV=2	122000	2470000	226000	0.539823	10.9292	0.539823	-0.267749	4.48149
RNPS1_HUMAN	1 (1)	21.13	0.00653	2.29	RNA-binding protein with serine-rich domain 1 OS=Homo sapiens GN=RNPS1 PE=1 SV=1	1580000	1370000	3140000	0.503185	0.436306	0.436306	-0.360209	2.18509
RO60_HUMAN	3 (3)	119.29	0.01	2.45	60 kDa SS-A/Ro ribonucleoprotein OS=Homo sapiens GN=TROVE2 PE=1 SV=2	3720000	7010000	9100000	0.408791	0.77033	0.408791	-0.388498	2
ROA0_HUMAN	6 (4)	273.31	7.04e-05	4.49	Heterogeneous nuclear ribonucleoprotein A0 OS=Homo sapiens GN=HNRNPA0 PE=1 SV=1	11400000	6040000	2540000	4.48819	2.37795	4.48819	0.652071	4.15243
ROAA_HUMAN	4 (3)	185.09	0.00472	10.18	Heterogeneous nuclear ribonucleoprotein A/B OS=Homo sapiens GN=HNRNPAB PE=1 SV=2	12400000	25200000	2480000	5	10.1613	10.1613	1.00695	2.32606
RPB3_HUMAN	1 (1)	20.64	0.000229	5.96	DNA-directed RNA polymerase II subunit RPB3 OS=Homo sapiens GN=POLR2C PE=1 SV=2	2090000	3460000	580000	3.60345	5.96552	5.96552	0.775648	3.64016
RPN2_HUMAN	6 (6)	248.71	0.000624	1.83	Dolichyl-diphosphooligosaccharide--protein glycosyltransferase subunit 2 OS=Homo sapiens GN=RPN2 PE=1 SV=3	17700000	27800000	15200000	1.16447	1.82895	1.82895	0.262201	3.20482
RRBP1_HUMAN	30 (25)	1362.71	2.04e-05	1.86	Ribosome-binding protein 1 OS=Homo sapiens GN=RRBP1 PE=1 SV=4	72200000	92200000	49500000	1.45859	1.86263	1.86263	0.270126	4.69037
RRP1_HUMAN	1 (1)	17.63	0.00985	295.14	Ribosomal RNA processing protein 1 homolog A OS=Homo sapiens GN=RRP1 PE=1 SV=1	1580000	1520000	5357.07	294.937	283.737	294.937	2.46973	2.00656
RS10_HUMAN	5 (2)	127.41	0.0014	7.26	40S ribosomal protein S10 OS=Homo sapiens GN=RPS10 PE=1 SV=1	1040000	7580000	7550000	0.137748	1.00397	0.137748	-0.860914	2.85387
RS11_HUMAN	5 (5)	129.59	2.54e-05	2.39	40S ribosomal protein S11 OS=Homo sapiens GN=RPS11 PE=1 SV=3	11600000	12100000	27600000	0.42029	0.438406	0.42029	-0.376451	4.59517
RS12_HUMAN	6 (6)	246.06	0.00164	1.61	40S ribosomal protein S12 OS=Homo sapiens GN=RPS12 PE=1 SV=3	40000000	64600000	59300000	0.674536	1.08938	0.674536	-0.170995	2.78516
RS13_HUMAN	6 (5)	232.46	0.00156	1.91	40S ribosomal protein S13 OS=Homo sapiens GN=RPS13 PE=1 SV=2	30900000	40900000	58900000	0.524618	0.694397	0.524618	-0.280157	2.80688
RS15A_HUMAN	4 (4)	172.05	0.00689	1.78	40S ribosomal protein S15a OS=Homo sapiens GN=RPS15A PE=1 SV=2	28900000	48700000	51400000	0.562257	0.947471	0.562257	-0.250065	2.16178
RS19_HUMAN	5 (4)	217.41	0.0011	1.97	40S ribosomal protein S19 OS=Homo sapiens GN=RPS19 PE=1 SV=2	20300000	40000000	20800000	0.975962	1.92308	1.92308	0.283997	2.95861
RS2_HUMAN	9 (8)	411.69	0.00119	2.48	40S ribosomal protein S2 OS=Homo sapiens GN=RPS2 PE=1 SV=2	24300000	60100000	43000000	0.565116	1.39767	0.565116	-0.247862	2.92445
RS25_HUMAN	4 (3)	171.17	0.00226	1.7	40S ribosomal protein S25 OS=Homo sapiens GN=RPS25 PE=1 SV=1	28700000	32500000	48900000	0.586912	0.664622	0.586912	-0.231427	2.64589
RS27L_HUMAN	2 (1)	103.37	0.000936	3.78	40S ribosomal protein S27-like OS=Homo sapiens GN=RPS27L PE=1 SV=3	10400000	9810000	2760000	3.76812	3.55435	3.76812	0.576124	3.02872
RS28_HUMAN	2 (2)	144.56	0.000202	1.96	40S ribosomal protein S28 OS=Homo sapiens GN=RPS28 PE=1 SV=1	25600000	20200000	39500000	0.648101	0.511392	0.511392	-0.291246	3.69465
RS3A_HUMAN	12 (11)	417.82	1.55e-06	2.24	40S ribosomal protein S3a OS=Homo sapiens GN=RPS3A PE=1 SV=2	112000000	115000000	250000000	0.448	0.46	0.448	-0.348722	5.80967
RS8_HUMAN	6 (5)	288.08	5.01e-05	1.79	40S ribosomal protein S8 OS=Homo sapiens GN=RPS8 PE=1 SV=2	28500000	44400000	24800000	1.14919	1.79032	1.79032	0.252931	4.30016
RS9_HUMAN	8 (7)	251.78	6.36e-05	1.51	40S ribosomal protein S9 OS=Homo sapiens GN=RPS9 PE=1 SV=3	39300000	58000000	59300000	0.662732	0.978078	0.662732	-0.178662	4.19654
RSSA_HUMAN	10 (10)	517.9	6.56e-05	1.68	40S ribosomal protein SA OS=Homo sapiens GN=RPSA PE=1 SV=4	65400000	110000000	66500000	0.983459	1.65414	1.65414	0.218571	4.1831
RTCB_HUMAN	4 (3)	155.55	2.16e-05	1.54	tRNA-splicing ligase RtcB homolog OS=Homo sapiens GN=RTCB PE=1 SV=1	9840000	12400000	8060000	1.22084	1.53846	1.53846	0.187087	4.66555
RU17_HUMAN	3 (3)	64.57	0.00893	2.11	U1 small nuclear ribonucleoprotein 70 kDa OS=Homo sapiens GN=SNRNP70 PE=1 SV=2	5160000	9400000	10900000	0.473394	0.862385	0.473394	-0.324777	2.04915
RU2A_HUMAN	4 (4)	129.99	0.00225	2.08	U2 small nuclear ribonucleoprotein A' OS=Homo sapiens GN=SNRPA1 PE=1 SV=2	7090000	5510000	3400000	2.08529	1.62059	2.08529	0.319167	2.64782
RU2B_HUMAN	4 (1)	143.32	0.000382	26.48	U2 small nuclear ribonucleoprotein B'' OS=Homo sapiens GN=SNRPB2 PE=1 SV=1	1870000	1150000	70500	26.5248	16.3121	26.5248	1.42365	3.41794
RUVB1_HUMAN	5 (4)	124.5	0.00192	2.38	RuvB-like 1 OS=Homo sapiens GN=RUVBL1 PE=1 SV=1	7110000	9070000	3820000	1.86126	2.37435	2.37435	0.375544	2.7167
RUXGL_HUMAN	1 (1)	61.47	0.00215	1.84	Putative small nuclear ribonucleoprotein G-like protein 15 OS=Homo sapiens GN=SNRPGP15 PE=5 SV=2	3640000	6700000	6270000	0.580542	1.06858	0.580542	-0.236166	2.66756
S100P_HUMAN	1 (1)	92.21	3.63e-05	113.95	Protein S100-P OS=Homo sapiens GN=S100P PE=1 SV=2	508000	2410000	21200	23.9623	113.679	113.679	2.05568	4.44009
S10A4_HUMAN	4 (4)	135.72	1.32e-05	4.09	Protein S100-A4 OS=Homo sapiens GN=S100A4 PE=1 SV=1	47200000	145000000	35400000	1.33333	4.09605	4.09605	0.612365	4.87943
S10A6_HUMAN	3 (2)	128	0.000902	7.92	Protein S100-A6 OS=Homo sapiens GN=S100A6 PE=1 SV=1	109000000	562000000	70900000	1.53738	7.92666	7.92666	0.89909	3.04479
S10A8_HUMAN	4 (4)	208.57	0.000172	2.84	Protein S100-A8 OS=Homo sapiens GN=S100A8 PE=1 SV=1	27500000	59000000	78200000	0.351662	0.754476	0.351662	-0.453874	3.76447
S10A9_HUMAN	5 (5)	196.21	6.22e-06	3.28	Protein S100-A9 OS=Homo sapiens GN=S100A9 PE=1 SV=1	34900000	56900000	115000000	0.303478	0.494783	0.303478	-0.517872	5.20621
S10AA_HUMAN	2 (1)	58.67	1.03e-05	3.72	Protein S100-A10 OS=Homo sapiens GN=S100A10 PE=1 SV=2	33200000	123000000	35100000	0.945869	3.50427	3.50427	0.544598	4.98716
S10AB_HUMAN	6 (6)	289.3	6.6e-05	6.04	Protein S100-A11 OS=Homo sapiens GN=S100A11 PE=1 SV=2	80800000	298000000	49400000	1.63563	6.03239	6.03239	0.780489	4.18046
S10AD_HUMAN	4 (4)	222.41	0.00102	2.7	Protein S100-A13 OS=Homo sapiens GN=S100A13 PE=1 SV=1	31200000	56000000	20800000	1.5	2.69231	2.69231	0.430125	2.9914
S10AG_HUMAN	2 (2)	93.47	1.63e-05	90.06	Protein S100-A16 OS=Homo sapiens GN=S100A16 PE=1 SV=1	1830000	8650000	96100	19.0427	90.0104	90.0104	1.95429	4.78781
S61A1_HUMAN	3 (2)	83.32	0.00199	1.74	Protein transport protein Sec61 subunit alpha isoform 1 OS=Homo sapiens GN=SEC61A1 PE=1 SV=2	5360000	9350000	8910000	0.601571	1.04938	0.601571	-0.220713	2.70115
SAC1_HUMAN	1 (1)	28.04	0.000933	6.27	Phosphatidylinositide phosphatase SAC1 OS=Homo sapiens GN=SACM1L PE=1 SV=2	1040000	793000	166000	6.26506	4.77711	6.26506	0.796925	3.03012
SAFB2_HUMAN	5 (2)	147.8	1.11e-06	6.56	Scaffold attachment factor B2 OS=Homo sapiens GN=SAFB2 PE=1 SV=1	108000000	94100000	16400000	6.58537	5.7378	6.58537	0.81858	5.95468
SAHH_HUMAN	12 (9)	561.66	0.000325	2.23	Adenosylhomocysteinase OS=Homo sapiens GN=AHCY PE=1 SV=4	40500000	67100000	30100000	1.34551	2.22924	2.22924	0.348156	3.48812
SAMH1_HUMAN	11 (10)	394.38	1.07e-05	4.16	Deoxynucleoside triphosphate triphosphohydrolase SAMHD1 OS=Homo sapiens GN=SAMHD1 PE=1 SV=2	40200000	23000000	9670000	4.15719	2.37849	4.15719	0.6188	4.97062
SAP_HUMAN	10 (9)	432.86	0.000423	1.64	Prosaposin OS=Homo sapiens GN=PSAP PE=1 SV=2	89100000	146000000	134000000	0.664925	1.08955	0.664925	-0.177227	3.37366
SAP3_HUMAN	1 (1)	33.92	0.00899	3.8	Ganglioside GM2 activator OS=Homo sapiens GN=GM2A PE=1 SV=4	1340000	1120000	354000	3.78531	3.16384	3.78531	0.578102	2.04624
SART3_HUMAN	3 (3)	85.88	0.000209	5.23	Squamous cell carcinoma antigen recognized by T-cells 3 OS=Homo sapiens GN=SART3 PE=1 SV=1	1330000	5250000	1000000	1.33	5.25	5.25	0.720159	3.67985
SC16A_HUMAN	2 (2)	36.39	0.00945	4.5	Protein transport protein Sec16A OS=Homo sapiens GN=SEC16A PE=1 SV=3	2360000	2120000	524000	4.50382	4.0458	4.50382	0.653581	2.02457
SC22B_HUMAN	2 (1)	80.46	0.00811	493.75	Vesicle-trafficking protein SEC22b OS=Homo sapiens GN=SEC22B PE=1 SV=4	2830000	2930000	5938.62	476.542	493.381	493.381	2.69318	2.09098
SC23A_HUMAN	4 (3)	141.7	0.000175	3.72	Protein transport protein Sec23A OS=Homo sapiens GN=SEC23A PE=1 SV=2	7930000	10500000	2830000	2.80212	3.71025	3.71025	0.569403	3.75696
SC31A_HUMAN	10 (9)	304.38	0.00499	2.27	Protein transport protein Sec31A OS=Homo sapiens GN=SEC31A PE=1 SV=3	13000000	25700000	11300000	1.15044	2.27434	2.27434	0.356855	2.3019
SC61B_HUMAN	3 (3)	140.62	0.01	3.1	Protein transport protein Sec61 subunit beta OS=Homo sapiens GN=SEC61B PE=1 SV=2	13500000	8310000	4360000	3.09633	1.90596	3.09633	0.490847	2
SCAM3_HUMAN	3 (2)	84.38	0.02	6.85	Secretory carrier-associated membrane protein 3 OS=Homo sapiens GN=SCAMP3 PE=1 SV=3	1900000	347000	277000	6.85921	1.25271	6.85921	0.836274	1.69897
SCFD1_HUMAN	4 (4)	123.55	0.00376	3.46	Sec1 family domain-containing protein 1 OS=Homo sapiens GN=SCFD1 PE=1 SV=4	4630000	6440000	1860000	2.48925	3.46237	3.46237	0.539373	2.42481
SCOT1_HUMAN	3 (3)	104.74	8.16e-05	20.86	Succinyl-CoA:3-ketoacid coenzyme A transferase 1, mitochondrial OS=Homo sapiens GN=OXCT1 PE=1 SV=1	3530000	3460000	169000	20.8876	20.4734	20.8876	1.31989	4.08831
SCPDL_HUMAN	2 (2)	50.84	0.00115	2.19	Saccharopine dehydrogenase-like oxidoreductase OS=Homo sapiens GN=SCCPDH PE=1 SV=1	3250000	3610000	1650000	1.9697	2.18788	2.18788	0.340023	2.9393
SCRB2_HUMAN	5 (5)	181.7	0.000752	2.4	Lysosome membrane protein 2 OS=Homo sapiens GN=SCARB2 PE=1 SV=2	9150000	13900000	5800000	1.57759	2.39655	2.39655	0.379587	3.12378
SCRN1_HUMAN	9 (7)	226.25	0.00872	1.65	Secernin-1 OS=Homo sapiens GN=SCRN1 PE=1 SV=2	16500000	10500000	10000000	1.65	1.05	1.65	0.217484	2.05948
SDHA_HUMAN	8 (8)	304.1	3.92e-06	4.05	Succinate dehydrogenase [ubiquinone] flavoprotein subunit, mitochondrial OS=Homo sapiens GN=SDHA PE=1 SV=2	34400000	26100000	8500000	4.04706	3.07059	4.04706	0.60714	5.40671
SDHB_HUMAN	5 (5)	227.09	0.000647	1.73	Succinate dehydrogenase [ubiquinone] iron-sulfur subunit, mitochondrial OS=Homo sapiens GN=SDHB PE=1 SV=3	15800000	18300000	10500000	1.50476	1.74286	1.74286	0.241262	3.1891
SEC62_HUMAN	2 (2)	55.92	0.01	1.84	Translocation protein SEC62 OS=Homo sapiens GN=SEC62 PE=1 SV=1	3210000	4090000	2220000	1.44595	1.84234	1.84234	0.26537	2
SEP11_HUMAN	3 (2)	93.2	3.38e-05	5.55	Septin-11 OS=Homo sapiens GN=SEPT11 PE=1 SV=3	3560000	8520000	1540000	2.31169	5.53247	5.53247	0.742919	4.47108
SEP15_HUMAN	1 (1)	57.12	0.00233	5.45	15 kDa selenoprotein OS=Homo sapiens GN=SEP15 PE=1 SV=3	1190000	990000	218000	5.45872	4.54128	5.45872	0.73709	2.63264
SEPT2_HUMAN	7 (7)	272.9	1.83e-05	2.97	Septin-2 OS=Homo sapiens GN=SEPT2 PE=1 SV=1	19400000	27200000	9160000	2.1179	2.96943	2.96943	0.472673	4.73755
SEPT7_HUMAN	9 (7)	378.82	1.97e-05	3.81	Septin-7 OS=Homo sapiens GN=SEPT7 PE=1 SV=2	18500000	35400000	9290000	1.99139	3.81055	3.81055	0.580988	4.70553
SERA_HUMAN	8 (8)	307.62	6.97e-07	3.87	D-3-phosphoglycerate dehydrogenase OS=Homo sapiens GN=PHGDH PE=1 SV=4	32600000	10400000	8430000	3.86714	1.23369	3.86714	0.58739	6.15677
SERC_HUMAN	6 (5)	213.64	0.000198	2.42	Phosphoserine aminotransferase OS=Homo sapiens GN=PSAT1 PE=1 SV=2	9580000	5670000	3960000	2.41919	1.43182	2.41919	0.38367	3.70333
SERPH_HUMAN	14 (13)	690.76	0.000409	1.57	Serpin H1 OS=Homo sapiens GN=SERPINH1 PE=1 SV=2	79400000	120000000	76100000	1.04336	1.57687	1.57687	0.197797	3.38828
SET_HUMAN	5 (1)	264.81	0.00438	2.27	Protein SET OS=Homo sapiens GN=SET PE=1 SV=3	11900000	27000000	19700000	0.604061	1.37056	0.604061	-0.218919	2.35853
SF01_HUMAN	4 (4)	135.6	0.0014	2.3	Splicing factor 1 OS=Homo sapiens GN=SF1 PE=1 SV=4	6770000	7770000	3370000	2.0089	2.30564	2.30564	0.362791	2.85387
SF3A2_HUMAN	2 (2)	42.47	7.67e-05	227.38	Splicing factor 3A subunit 2 OS=Homo sapiens GN=SF3A2 PE=1 SV=2	782000	92100000	405000	1.93086	227.407	227.407	2.3568	4.1152
SF3B1_HUMAN	6 (4)	235.38	0.00115	9.82	Splicing factor 3B subunit 1 OS=Homo sapiens GN=SF3B1 PE=1 SV=3	10500000	10700000	1090000	9.63303	9.81651	9.81651	0.991957	2.9393
SF3B3_HUMAN	5 (4)	135.21	0.000603	3.13	Splicing factor 3B subunit 3 OS=Homo sapiens GN=SF3B3 PE=1 SV=4	11700000	8580000	3740000	3.12834	2.29412	3.12834	0.495314	3.21968
SF3B6_HUMAN	2 (2)	48.86	0.00394	2.89	Splicing factor 3B subunit 6 OS=Homo sapiens GN=SF3B6 PE=1 SV=1	3150000	2830000	1090000	2.88991	2.59633	2.88991	0.460884	2.4045
SFPQ_HUMAN	11 (8)	344.32	0.000269	2.2	Splicing factor, proline- and glutamine-rich OS=Homo sapiens GN=SFPQ PE=1 SV=2	19800000	10400000	22900000	0.864629	0.454148	0.454148	-0.342802	3.57025
SH3L1_HUMAN	4 (4)	188.57	0.00102	1.55	SH3 domain-binding glutamic acid-rich-like protein OS=Homo sapiens GN=SH3BGRL PE=1 SV=1	18300000	22900000	14800000	1.23649	1.5473	1.5473	0.189574	2.9914
SH3L3_HUMAN	2 (2)	88.68	0.01	2.31	SH3 domain-binding glutamic acid-rich-like protein 3 OS=Homo sapiens GN=SH3BGRL3 PE=1 SV=1	6340000	14700000	11100000	0.571171	1.32432	0.571171	-0.243234	2
SHOT1_HUMAN	2 (1)	28.16	0.00792	3.43	Shootin-1 OS=Homo sapiens GN=SHTN1 PE=1 SV=4	1380000	1040000	401000	3.4414	2.59352	3.4414	0.536735	2.10127
SIAS_HUMAN	3 (3)	112.82	5.59e-07	4.03	Sialic acid synthase OS=Homo sapiens GN=NANS PE=1 SV=2	7890000	12900000	3210000	2.45794	4.01869	4.01869	0.604085	6.25259
SK2L2_HUMAN	1 (1)	26.6	0.00136	2	Superkiller viralicidic activity 2-like 2 OS=Homo sapiens GN=SKIV2L2 PE=1 SV=3	743000	928000	464000	1.60129	2	2	0.30103	2.86646
SMC1A_HUMAN	6 (3)	159.28	0.00133	3.81	Structural maintenance of chromosomes protein 1A OS=Homo sapiens GN=SMC1A PE=1 SV=2	3100000	1410000	814000	3.80835	1.73219	3.80835	0.580737	2.87615
SMC3_HUMAN	3 (3)	69.75	4.94e-06	7.18	Structural maintenance of chromosomes protein 3 OS=Homo sapiens GN=SMC3 PE=1 SV=2	1560000	2080000	290000	5.37931	7.17241	7.17241	0.855665	5.30627
SMD1_HUMAN	1 (1)	23.36	0.00532	1.99	Small nuclear ribonucleoprotein Sm D1 OS=Homo sapiens GN=SNRPD1 PE=1 SV=1	3230000	3890000	1960000	1.64796	1.98469	1.98469	0.297694	2.27409
SMD3_HUMAN	1 (1)	27.6	0.00286	3.58	Small nuclear ribonucleoprotein Sm D3 OS=Homo sapiens GN=SNRPD3 PE=1 SV=1	2290000	8190000	6980000	0.32808	1.17335	0.32808	-0.48402	2.54363
SNAA_HUMAN	5 (3)	197.05	7.45e-06	2.51	Alpha-soluble NSF attachment protein OS=Homo sapiens GN=NAPA PE=1 SV=3	7400000	7440000	2970000	2.49158	2.50505	2.50505	0.398816	5.12784
SNF5_HUMAN	1 (1)	15.88	0.000325	16.8	SWI/SNF-related matrix-associated actin-dependent regulator of chromatin subfamily B member 1 OS=Homo sapiens GN=SMARCB1 PE=1 SV=2	861000	674000	51200	16.8164	13.1641	16.8164	1.22573	3.48812
SNG2_HUMAN	1 (1)	22.22	0.000187	8.22	Synaptogyrin-2 OS=Homo sapiens GN=SYNGR2 PE=1 SV=1	1760000	215000	1430000	1.23077	0.15035	0.15035	-0.822898	3.72816
SNX1_HUMAN	5 (4)	168.38	0.01	1.56	Sorting nexin-1 OS=Homo sapiens GN=SNX1 PE=1 SV=3	3770000	3530000	5500000	0.685455	0.641818	0.641818	-0.192588	2
SOAT1_HUMAN	1 (1)	22.36	2.87e-06	30.28	Sterol O-acyltransferase 1 OS=Homo sapiens GN=SOAT1 PE=1 SV=3	80600	545000	2440000	0.0330328	0.223361	0.0330328	-1.48105	5.54212
SODC_HUMAN	4 (3)	266.12	1.8e-05	2.66	Superoxide dismutase [Cu-Zn] OS=Homo sapiens GN=SOD1 PE=1 SV=2	25900000	68900000	28800000	0.899306	2.39236	2.39236	0.378827	4.74473
SODM_HUMAN	4 (3)	118.93	0.00201	4.1	Superoxide dismutase [Mn], mitochondrial OS=Homo sapiens GN=SOD2 PE=1 SV=2	6150000	13900000	25200000	0.244048	0.551587	0.244048	-0.612525	2.6968
SON_HUMAN	1 (1)	20.52	0.00162	8.16	Protein SON OS=Homo sapiens GN=SON PE=1 SV=4	5930000	6200000	760000	7.80263	8.15789	8.15789	0.911578	2.79048
SORCN_HUMAN	7 (5)	285.14	0.000357	2.41	Sorcin OS=Homo sapiens GN=SRI PE=1 SV=1	20300000	22400000	9300000	2.1828	2.4086	2.4086	0.381765	3.44733
SP16H_HUMAN	1 (1)	28.03	0.00781	4.58	FACT complex subunit SPT16 OS=Homo sapiens GN=SUPT16H PE=1 SV=1	577000	790000	172000	3.35465	4.59302	4.59302	0.662099	2.10735
SPB6_HUMAN	5 (4)	163.24	1.41e-05	4.01	Serpin B6 OS=Homo sapiens GN=SERPINB6 PE=1 SV=3	6070000	10800000	2690000	2.25651	4.01487	4.01487	0.603671	4.85078
SPB9_HUMAN	5 (3)	103.27	9.23e-05	1.99	Serpin B9 OS=Homo sapiens GN=SERPINB9 PE=1 SV=1	6770000	7030000	13400000	0.505224	0.524627	0.505224	-0.296516	4.0348
SPEE_HUMAN	1 (1)	30.38	0.00228	23.85	Spermidine synthase OS=Homo sapiens GN=SRM PE=1 SV=1	93100	1610000	2220000	0.0419369	0.725225	0.0419369	-1.3774	2.64207
SPIT2_HUMAN	2 (2)	67.85	0.000318	3.75	Kunitz-type protease inhibitor 2 OS=Homo sapiens GN=SPINT2 PE=1 SV=2	2870000	765000	885000	3.24294	0.864407	3.24294	0.510939	3.49757
SPON1_HUMAN	11 (9)	468.61	6.17e-07	15.8	Spondin-1 OS=Homo sapiens GN=SPON1 PE=1 SV=2	74300000	32700000	4700000	15.8085	6.95745	15.8085	1.19889	6.20971
SPTB1_HUMAN	1 (1)	32.25	5.53e-05	32.9	Spectrin beta chain, erythrocytic OS=Homo sapiens GN=SPTB PE=1 SV=5	858000	26100	32600	26.319	0.800613	26.319	1.42027	4.25727
SPTB2_HUMAN	29 (25)	1129.5	4.76e-05	2.46	Spectrin beta chain, non-erythrocytic 1 OS=Homo sapiens GN=SPTBN1 PE=1 SV=2	35200000	51800000	21000000	1.67619	2.46667	2.46667	0.39211	4.32239
SPTN1_HUMAN	51 (41)	1944.26	4.85e-07	4.22	Spectrin alpha chain, non-erythrocytic 1 OS=Homo sapiens GN=SPTAN1 PE=1 SV=3	76500000	154000000	36500000	2.09589	4.21918	4.21918	0.625228	6.31426
SQRD_HUMAN	5 (5)	197.3	0.00867	4.31	Sulfide:quinone oxidoreductase, mitochondrial OS=Homo sapiens GN=SQRDL PE=1 SV=1	3980000	12500000	2910000	1.3677	4.29553	4.29553	0.633017	2.06198
SRBS1_HUMAN	2 (2)	75.56	1.01e-05	5.77	Sorbin and SH3 domain-containing protein 1 OS=Homo sapiens GN=SORBS1 PE=1 SV=3	4420000	2450000	766000	5.77023	3.19843	5.77023	0.761193	4.99568
SRG2B_HUMAN	1 (1)	23.51	4.18e-05	4.06	SLIT-ROBO Rho GTPase-activating protein 2B OS=Homo sapiens GN=SRGAP2B PE=3 SV=1	645000	686000	169000	3.81657	4.05917	4.05917	0.608437	4.37882
SRP14_HUMAN	5 (5)	260.34	0.000263	1.78	Signal recognition particle 14 kDa protein OS=Homo sapiens GN=SRP14 PE=1 SV=2	16700000	19100000	29700000	0.56229	0.643098	0.56229	-0.25004	3.58004
SRP19_HUMAN	1 (1)	75.85	0.02	79.53	Signal recognition particle 19 kDa protein OS=Homo sapiens GN=SRP19 PE=1 SV=3	499000	425000	6269.18	79.5957	67.792	79.5957	1.90089	1.69897
SRP72_HUMAN	4 (3)	161.82	0.000882	1.84	Signal recognition particle subunit SRP72 OS=Homo sapiens GN=SRP72 PE=1 SV=3	3480000	4490000	2440000	1.42623	1.84016	1.84016	0.264857	3.05453
SRPR_HUMAN	1 (1)	29.85	0.000247	13.46	Signal recognition particle receptor subunit alpha OS=Homo sapiens GN=SRPR PE=1 SV=2	883000	1650000	122000	7.2377	13.5246	13.5246	1.13112	3.6073
SRRM2_HUMAN	1 (1)	22.61	0.02	6.48	Serine/arginine repetitive matrix protein 2 OS=Homo sapiens GN=SRRM2 PE=1 SV=2	236000	441000	1530000	0.154248	0.288235	0.154248	-0.811779	1.69897
SRSF4_HUMAN	3 (1)	65.81	0.000153	4.25	Serine/arginine-rich splicing factor 4 OS=Homo sapiens GN=SRSF4 PE=1 SV=2	3200000	1170000	4970000	0.643863	0.235412	0.235412	-0.628171	3.81531
SRSF9_HUMAN	1 (1)	28.39	0.000293	3.55	Serine/arginine-rich splicing factor 9 OS=Homo sapiens GN=SRSF9 PE=1 SV=1	980000	837000	276000	3.55072	3.03261	3.55072	0.550317	3.53313
SSBP_HUMAN	3 (3)	120.98	1.48e-05	3.46	Single-stranded DNA-binding protein, mitochondrial OS=Homo sapiens GN=SSBP1 PE=1 SV=1	25600000	11600000	7390000	3.46414	1.56969	3.46414	0.539596	4.82974
SSDH_HUMAN	4 (3)	134.4	0.000205	1.7	Succinate-semialdehyde dehydrogenase, mitochondrial OS=Homo sapiens GN=ALDH5A1 PE=1 SV=2	14200000	18200000	24100000	0.589212	0.755187	0.589212	-0.229729	3.68825
SSRA_HUMAN	3 (3)	122.65	0.000741	1.87	Translocon-associated protein subunit alpha OS=Homo sapiens GN=SSR1 PE=1 SV=3	19300000	32400000	17300000	1.11561	1.87283	1.87283	0.272499	3.13018
SSRD_HUMAN	3 (3)	165.44	0.00198	2.19	Translocon-associated protein subunit delta OS=Homo sapiens GN=SSR4 PE=1 SV=1	11800000	25900000	14000000	0.842857	1.85	1.85	0.267172	2.70333
ST1B1_HUMAN	1 (1)	26.59	2.46e-05	8.82	Sulfotransferase family cytosolic 1B member 1 OS=Homo sapiens GN=SULT1B1 PE=1 SV=2	235000	2070000	1030000	0.228155	2.00971	0.228155	-0.641769	4.60906
STAT1_HUMAN	9 (8)	270.69	6.1e-07	19.31	Signal transducer and activator of transcription 1-alpha/beta OS=Homo sapiens GN=STAT1 PE=1 SV=2	35500000	20300000	1840000	19.2935	11.0326	19.2935	1.28541	6.21467
STIP1_HUMAN	15 (13)	713.59	0.00171	1.72	Stress-induced-phosphoprotein 1 OS=Homo sapiens GN=STIP1 PE=1 SV=1	54700000	94200000	60200000	0.908638	1.56478	1.56478	0.194454	2.767
STML2_HUMAN	5 (5)	204.74	7.39e-05	2.2	Stomatin-like protein 2, mitochondrial OS=Homo sapiens GN=STOML2 PE=1 SV=1	9370000	13900000	6310000	1.48494	2.20285	2.20285	0.342985	4.13136
STMN1_HUMAN	4 (3)	161.33	0.000101	2.14	Stathmin OS=Homo sapiens GN=STMN1 PE=1 SV=3	21000000	17100000	9840000	2.13415	1.7378	2.13415	0.329224	3.99568
STT3A_HUMAN	8 (6)	305.64	0.00149	3.39	Dolichyl-diphosphooligosaccharide--protein glycosyltransferase subunit STT3A OS=Homo sapiens GN=STT3A PE=1 SV=2	18500000	32600000	9640000	1.91909	3.38174	3.38174	0.529141	2.82681
STT3B_HUMAN	4 (3)	146.99	0.000264	2.19	Dolichyl-diphosphooligosaccharide--protein glycosyltransferase subunit STT3B OS=Homo sapiens GN=STT3B PE=1 SV=1	5560000	11000000	5040000	1.10317	2.18254	2.18254	0.338962	3.5784
STX4_HUMAN	2 (2)	60.26	0.01	160.31	Syntaxin-4 OS=Homo sapiens GN=STX4 PE=1 SV=2	759000	428000	4736.86	160.233	90.3552	160.233	2.20475	2
STX7_HUMAN	3 (3)	110.22	0.000438	2.57	Syntaxin-7 OS=Homo sapiens GN=STX7 PE=1 SV=4	3130000	3280000	1280000	2.44531	2.5625	2.5625	0.408664	3.35853
SUCA_HUMAN	2 (2)	86.36	0.000163	20.19	Succinyl-CoA ligase [ADP/GDP-forming] subunit alpha, mitochondrial OS=Homo sapiens GN=SUCLG1 PE=1 SV=4	7530000	5780000	373000	20.1877	15.496	20.1877	1.30509	3.78781
SUCB2_HUMAN	9 (8)	356.26	0.00154	3.14	Succinyl-CoA ligase [GDP-forming] subunit beta, mitochondrial OS=Homo sapiens GN=SUCLG2 PE=1 SV=2	24200000	34900000	11100000	2.18018	3.14414	3.14414	0.497502	2.81248
SYAC_HUMAN	13 (10)	516.32	4.36e-05	3.31	Alanine--tRNA ligase, cytoplasmic OS=Homo sapiens GN=AARS PE=1 SV=2	24300000	32300000	9770000	2.48721	3.30604	3.30604	0.519308	4.36051
SYEP_HUMAN	18 (13)	680.72	0.000146	6.36	Bifunctional glutamate/proline--tRNA ligase OS=Homo sapiens GN=EPRS PE=1 SV=5	31900000	31300000	5020000	6.35458	6.23506	6.35458	0.803087	3.83565
SYFB_HUMAN	3 (3)	154.36	0.00164	6.55	Phenylalanine--tRNA ligase beta subunit OS=Homo sapiens GN=FARSB PE=1 SV=3	2180000	14200000	8450000	0.257988	1.68047	0.257988	-0.5884	2.78516
SYIC_HUMAN	9 (9)	260.59	6.07e-05	2.43	Isoleucine--tRNA ligase, cytoplasmic OS=Homo sapiens GN=IARS PE=1 SV=2	17000000	21100000	8700000	1.95402	2.42529	2.42529	0.384763	4.21681
SYMC_HUMAN	3 (3)	145.02	0.01	2.4	Methionine--tRNA ligase, cytoplasmic OS=Homo sapiens GN=MARS PE=1 SV=2	5610000	5760000	2400000	2.3375	2.4	2.4	0.380211	2
SYNC_HUMAN	10 (9)	343.28	0.000618	2.59	Asparagine--tRNA ligase, cytoplasmic OS=Homo sapiens GN=NARS PE=1 SV=1	43000000	58700000	22700000	1.89427	2.5859	2.5859	0.412612	3.20901
SYNE2_HUMAN	2 (1)	50.39	9.1e-06	2.94	Nesprin-2 OS=Homo sapiens GN=SYNE2 PE=1 SV=3	14600000	42900000	15500000	0.941935	2.76774	2.76774	0.442126	5.04096
SYQ_HUMAN	3 (2)	83.19	0.000652	9.91	Glutamine--tRNA ligase OS=Homo sapiens GN=QARS PE=1 SV=1	3480000	3180000	351000	9.91453	9.05983	9.91453	0.996272	3.18575
SYRC_HUMAN	8 (6)	239.19	0.000473	2.19	Arginine--tRNA ligase, cytoplasmic OS=Homo sapiens GN=RARS PE=1 SV=2	8530000	14400000	6560000	1.3003	2.19512	2.19512	0.341459	3.32514
SYTC_HUMAN	8 (7)	269.75	2.91e-05	3.7	Threonine--tRNA ligase, cytoplasmic OS=Homo sapiens GN=TARS PE=1 SV=3	17500000	26700000	7230000	2.42047	3.69295	3.69295	0.567373	4.53611
SYUA_HUMAN	1 (1)	30.79	0.00917	3.15	Alpha-synuclein OS=Homo sapiens GN=SNCA PE=1 SV=1	637000	831000	2010000	0.316915	0.413433	0.316915	-0.499057	2.03763
SYWC_HUMAN	8 (6)	385.49	1.55e-05	4.14	Tryptophan--tRNA ligase, cytoplasmic OS=Homo sapiens GN=WARS PE=1 SV=2	26700000	33700000	8130000	3.28413	4.14514	4.14514	0.617539	4.80967
SYYC_HUMAN	9 (6)	279.85	0.000535	1.67	Tyrosine--tRNA ligase, cytoplasmic OS=Homo sapiens GN=YARS PE=1 SV=4	11800000	11900000	7150000	1.65035	1.66434	1.66434	0.221241	3.27165
TAD2A_HUMAN	1 (1)	13.17	0.00635	12.24	Transcriptional adapter 2-alpha OS=Homo sapiens GN=TADA2A PE=1 SV=3	99000	60800	745000	0.132886	0.0816107	0.0816107	-1.08825	2.19723
TAGL_HUMAN	15 (10)	619.1	5.65e-09	7.9	Transgelin OS=Homo sapiens GN=TAGLN PE=1 SV=4	223000000	424000000	53600000	4.16045	7.91045	7.91045	0.898201	8.24795
TAGL2_HUMAN	13 (11)	758.74	1.05e-05	2.12	Transgelin-2 OS=Homo sapiens GN=TAGLN2 PE=1 SV=3	167000000	312000000	147000000	1.13605	2.12245	2.12245	0.326837	4.97881
TALDO_HUMAN	10 (8)	441.03	0.00111	1.65	Transaldolase OS=Homo sapiens GN=TALDO1 PE=1 SV=2	43600000	68300000	41500000	1.0506	1.64578	1.64578	0.216373	2.95468
TAP1_HUMAN	4 (3)	96.38	0.00153	4.88	Antigen peptide transporter 1 OS=Homo sapiens GN=TAP1 PE=1 SV=2	12800000	6450000	2620000	4.8855	2.46183	4.8855	0.688909	2.81531
TAP2_HUMAN	3 (2)	103.49	0.00833	5.56	Antigen peptide transporter 2 OS=Homo sapiens GN=TAP2 PE=1 SV=1	3700000	1450000	665000	5.56391	2.18045	5.56391	0.74538	2.07935
TBA1C_HUMAN	19 (2)	1168.32	0.00335	48.22	Tubulin alpha-1C chain OS=Homo sapiens GN=TUBA1C PE=1 SV=1	9050000	929000	188000	48.1383	4.94149	48.1383	1.68249	2.47496
TBA4A_HUMAN	17 (2)	1122.39	1.72e-06	12.29	Tubulin alpha-4A chain OS=Homo sapiens GN=TUBA4A PE=1 SV=1	7080000	17200000	1400000	5.05714	12.2857	12.2857	1.0894	5.76447
TBCA_HUMAN	4 (4)	187.04	1.99e-05	2.92	Tubulin-specific chaperone A OS=Homo sapiens GN=TBCA PE=1 SV=3	12100000	8070000	23600000	0.512712	0.341949	0.341949	-0.466038	4.70115
TBCD1_HUMAN	1 (1)	23.26	0.00052	26.53	TBC1 domain family member 1 OS=Homo sapiens GN=TBC1D1 PE=1 SV=2	134000	3560000	532000	0.25188	6.69173	0.25188	-0.598807	3.284
TCEA1_HUMAN	5 (3)	162.65	0.000702	6.82	Transcription elongation factor A protein 1 OS=Homo sapiens GN=TCEA1 PE=1 SV=2	6640000	4870000	973000	6.82425	5.00514	6.82425	0.834055	3.15366
TCP4_HUMAN	5 (5)	172.42	2.15e-06	2.98	Activated RNA polymerase II transcriptional coactivator p15 OS=Homo sapiens GN=SUB1 PE=1 SV=3	58700000	48100000	19700000	2.9797	2.44162	2.9797	0.474172	5.66756
TCPE_HUMAN	14 (12)	449.45	0.0035	1.7	T-complex protein 1 subunit epsilon OS=Homo sapiens GN=CCT5 PE=1 SV=1	28400000	36600000	48500000	0.585567	0.754639	0.585567	-0.232423	2.45593
TCRG1_HUMAN	2 (2)	55.56	0.000215	5.26	Transcription elongation regulator 1 OS=Homo sapiens GN=TCERG1 PE=1 SV=2	2240000	1700000	8920000	0.251121	0.190583	0.190583	-0.719916	3.66756
TENA_HUMAN	14 (11)	539.6	1.76e-08	3.47	Tenascin OS=Homo sapiens GN=TNC PE=1 SV=3	14200000	24800000	7160000	1.98324	3.46369	3.46369	0.539539	7.75449
TERA_HUMAN	31 (28)	1606.12	0.000238	1.67	Transitional endoplasmic reticulum ATPase OS=Homo sapiens GN=VCP PE=1 SV=4	152000000	255000000	161000000	0.944099	1.58385	1.58385	0.199714	3.62342
TES_HUMAN	7 (6)	249.05	4.02e-06	7.57	Testin OS=Homo sapiens GN=TES PE=1 SV=1	8150000	24400000	3220000	2.53106	7.57764	7.57764	0.879534	5.39577
TETN_HUMAN	7 (7)	288.63	4.13e-07	10.3	Tetranectin OS=Homo sapiens GN=CLEC3B PE=1 SV=3	30500000	12900000	2960000	10.3041	4.35811	10.3041	1.01301	6.38405
TF65_HUMAN	2 (1)	44.68	0.000104	12.1	Transcription factor p65 OS=Homo sapiens GN=RELA PE=1 SV=2	149000	1800000	1330000	0.11203	1.35338	0.11203	-0.950665	3.98297
TFR1_HUMAN	12 (12)	520.88	3.45e-08	3.8	Transferrin receptor protein 1 OS=Homo sapiens GN=TFRC PE=1 SV=2	21800000	26400000	82600000	0.263923	0.319613	0.263923	-0.578524	7.46218
TGM1_HUMAN	6 (6)	251.41	9.81e-06	7.35	Protein-glutamine gamma-glutamyltransferase K OS=Homo sapiens GN=TGM1 PE=1 SV=4	1710000	12600000	2990000	0.571906	4.21405	0.571906	-0.242675	5.00833
TGM2_HUMAN	2 (2)	62.94	0.00259	10.76	Protein-glutamine gamma-glutamyltransferase 2 OS=Homo sapiens GN=TGM2 PE=1 SV=2	1480000	2090000	195000	7.58974	10.7179	10.7179	1.03011	2.5867
TGON2_HUMAN	2 (2)	65.37	0.00756	7.55	Trans-Golgi network integral membrane protein 2 OS=Homo sapiens GN=TGOLN2 PE=1 SV=2	1430000	1300000	189000	7.56614	6.87831	7.56614	0.878874	2.12148
THIM_HUMAN	6 (6)	187.83	0.00928	2.65	3-ketoacyl-CoA thiolase, mitochondrial OS=Homo sapiens GN=ACAA2 PE=1 SV=2	17700000	24000000	9060000	1.95364	2.64901	2.64901	0.423083	2.03245
THIO_HUMAN	3 (3)	189.86	9.05e-05	4.52	Thioredoxin OS=Homo sapiens GN=TXN PE=1 SV=3	25200000	114000000	42500000	0.592941	2.68235	0.592941	-0.226988	4.04335
THRB_HUMAN	10 (10)	292.66	0.000574	2.77	Prothrombin OS=Homo sapiens GN=F2 PE=1 SV=2	42400000	30500000	15300000	2.77124	1.99346	2.77124	0.442674	3.24109
THSD4_HUMAN	3 (2)	112.39	3.81e-08	2.06	Thrombospondin type-1 domain-containing protein 4 OS=Homo sapiens GN=THSD4 PE=2 SV=2	5160000	7760000	3770000	1.3687	2.05836	2.05836	0.31352	7.41908
THTM_HUMAN	3 (2)	83.48	0.0014	1.79	3-mercaptopyruvate sulfurtransferase OS=Homo sapiens GN=MPST PE=1 SV=3	2310000	3560000	1990000	1.1608	1.78894	1.78894	0.252597	2.85387
TIM13_HUMAN	1 (1)	46.15	7.78e-05	4.27	Mitochondrial import inner membrane translocase subunit Tim13 OS=Homo sapiens GN=TIMM13 PE=1 SV=1	1070000	2270000	531000	2.01507	4.27495	4.27495	0.630931	4.10902
TIM44_HUMAN	2 (1)	69.09	0.000214	27.08	Mitochondrial import inner membrane translocase subunit TIM44 OS=Homo sapiens GN=TIMM44 PE=1 SV=2	2990000	3900000	80900000	0.0369592	0.0482077	0.0369592	-1.43228	3.66959
TIM8A_HUMAN	1 (1)	50.76	0.00268	3.61	Mitochondrial import inner membrane translocase subunit Tim8 A OS=Homo sapiens GN=TIMM8A PE=1 SV=1	1420000	2060000	569000	2.49561	3.62039	3.62039	0.558755	2.57187
TIMP1_HUMAN	4 (4)	120.08	0.01	1.61	Metalloproteinase inhibitor 1 OS=Homo sapiens GN=TIMP1 PE=1 SV=1	13200000	20900000	21200000	0.622642	0.985849	0.622642	-0.205762	2
TKFC_HUMAN	3 (3)	122.9	0.00142	13.98	Triokinase/FMN cyclase OS=Homo sapiens GN=TKFC PE=1 SV=2	1460000	2560000	183000	7.97814	13.9891	13.9891	1.14579	2.84771
TKT_HUMAN	19 (15)	781.19	0.000221	2.15	Transketolase OS=Homo sapiens GN=TKT PE=1 SV=3	114000000	148000000	68900000	1.65457	2.14804	2.14804	0.332042	3.65561
TLN1_HUMAN	69 (55)	2937.5	1.18e-05	2.15	Talin-1 OS=Homo sapiens GN=TLN1 PE=1 SV=3	187000000	215000000	99800000	1.87375	2.15431	2.15431	0.333308	4.92812
TM109_HUMAN	2 (1)	74.56	0.00134	4.37	Transmembrane protein 109 OS=Homo sapiens GN=TMEM109 PE=1 SV=1	7840000	2430000	10600000	0.739623	0.229245	0.229245	-0.6397	2.8729
TM169_HUMAN	1 (1)	13.31	0.01	3.89	Transmembrane protein 169 OS=Homo sapiens GN=TMEM169 PE=2 SV=1	357000	1390000	536000	0.666045	2.59328	0.666045	-0.176497	2
TM205_HUMAN	1 (1)	39.34	1.93e-05	19.34	Transmembrane protein 205 OS=Homo sapiens GN=TMEM205 PE=1 SV=1	6210000	7760000	401000	15.4863	19.3516	19.3516	1.28672	4.71444
TMCO1_HUMAN	1 (1)	13.68	1.84e-06	15.28	Transmembrane and coiled-coil domain-containing protein 1 OS=Homo sapiens GN=TMCO1 PE=1 SV=1	1320000	528000	86400	15.2778	6.11111	15.2778	1.18406	5.73518
TMED7_HUMAN	3 (2)	123.85	0.000114	2.23	Transmembrane emp24 domain-containing protein 7 OS=Homo sapiens GN=TMED7 PE=1 SV=2	9160000	10800000	4830000	1.89648	2.23602	2.23602	0.349477	3.9431
TMEDA_HUMAN	4 (4)	228.46	0.00144	2	Transmembrane emp24 domain-containing protein 10 OS=Homo sapiens GN=TMED10 PE=1 SV=2	14800000	18700000	29400000	0.503401	0.636054	0.503401	-0.298086	2.84164
TMM33_HUMAN	1 (1)	21.77	0.000827	1.99	Transmembrane protein 33 OS=Homo sapiens GN=TMEM33 PE=1 SV=2	1110000	820000	1630000	0.680982	0.503067	0.503067	-0.298374	3.08249
TMM43_HUMAN	4 (3)	80.79	0.00125	2.61	Transmembrane protein 43 OS=Homo sapiens GN=TMEM43 PE=1 SV=1	3170000	2800000	7320000	0.43306	0.382514	0.382514	-0.417353	2.90309
TNAP2_HUMAN	4 (3)	118.32	0.00013	6.72	Tumor necrosis factor alpha-induced protein 2 OS=Homo sapiens GN=TNFAIP2 PE=2 SV=2	767000	4610000	687000	1.11645	6.71033	6.71033	0.826744	3.88606
TNPO1_HUMAN	5 (3)	207.69	0.000465	1.57	Transportin-1 OS=Homo sapiens GN=TNPO1 PE=1 SV=2	7990000	10100000	6430000	1.24261	1.57076	1.57076	0.19611	3.33255
TOIP1_HUMAN	5 (4)	211.8	3.84e-05	5.3	Torsin-1A-interacting protein 1 OS=Homo sapiens GN=TOR1AIP1 PE=1 SV=2	1200000	5630000	6390000	0.187793	0.881064	0.187793	-0.72632	4.41567
TOM22_HUMAN	1 (1)	52.41	0.000473	9.56	Mitochondrial import receptor subunit TOM22 homolog OS=Homo sapiens GN=TOMM22 PE=1 SV=3	657000	752000	78700	8.34816	9.55527	9.55527	0.980243	3.32514
TOM40_HUMAN	3 (3)	95.39	1.63e-05	19.13	Mitochondrial import receptor subunit TOM40 homolog OS=Homo sapiens GN=TOMM40 PE=1 SV=1	6820000	7200000	377000	18.0902	19.0981	19.0981	1.28099	4.78781
TOM70_HUMAN	2 (2)	61.77	0.01	9.87	Mitochondrial import receptor subunit TOM70 OS=Homo sapiens GN=TOMM70A PE=1 SV=1	2310000	234000	834000	2.76978	0.280576	2.76978	0.442446	2
TPD54_HUMAN	6 (5)	261.5	4e-05	1.55	Tumor protein D54 OS=Homo sapiens GN=TPD52L2 PE=1 SV=2	11800000	14700000	18400000	0.641304	0.798913	0.641304	-0.192936	4.39794
TPIS_HUMAN	15 (14)	1100.23	0.000456	1.63	Triosephosphate isomerase OS=Homo sapiens GN=TPI1 PE=1 SV=3	528000000	611000000	860000000	0.613953	0.710465	0.613953	-0.211865	3.34104
TPM1_HUMAN	18 (3)	667	0.01	2.52	Tropomyosin alpha-1 chain OS=Homo sapiens GN=TPM1 PE=1 SV=2	11200000	16200000	6400000	1.75	2.53125	2.53125	0.403335	2
TPM2_HUMAN	15 (2)	642.12	1.05e-05	4.88	Tropomyosin beta chain OS=Homo sapiens GN=TPM2 PE=1 SV=1	14800000	24300000	4980000	2.97189	4.87952	4.87952	0.688377	4.97881
TPM3_HUMAN	17 (3)	573.87	0.000956	1.7	Tropomyosin alpha-3 chain OS=Homo sapiens GN=TPM3 PE=1 SV=2	23400000	34200000	39800000	0.58794	0.859296	0.58794	-0.230667	3.01954
TPM4_HUMAN	19 (6)	869.4	3.13e-05	2.36	Tropomyosin alpha-4 chain OS=Homo sapiens GN=TPM4 PE=1 SV=3	53800000	116000000	49100000	1.09572	2.36253	2.36253	0.373376	4.50446
TPP1_HUMAN	1 (1)	46.75	0.00915	1364.18	Tripeptidyl-peptidase 1 OS=Homo sapiens GN=TPP1 PE=1 SV=2	810000	10300000	7532.79	107.53	1367.36	1367.36	3.13588	2.03858
TPSN_HUMAN	4 (4)	90.51	0.000186	2.13	Tapasin OS=Homo sapiens GN=TAPBP PE=1 SV=1	19000000	11900000	8930000	2.12766	1.33259	2.12766	0.327902	3.73049
TR150_HUMAN	8 (5)	182.03	0.02	1.52	Thyroid hormone receptor-associated protein 3 OS=Homo sapiens GN=THRAP3 PE=1 SV=2	12200000	10500000	8010000	1.5231	1.31086	1.5231	0.182727	1.69897
TRA2A_HUMAN	2 (1)	71.28	0.000384	8.57	Transformer-2 protein homolog alpha OS=Homo sapiens GN=TRA2A PE=1 SV=1	2210000	258000	1370000	1.61314	0.188321	1.61314	0.207672	3.41567
TRA2B_HUMAN	2 (1)	94.48	0.00897	559.11	Transformer-2 protein homolog beta OS=Homo sapiens GN=TRA2B PE=1 SV=1	5200000	3610000	9303.71	558.917	388.017	558.917	2.74735	2.04721
TRAP1_HUMAN	8 (6)	289.32	0.01	2.78	Heat shock protein 75 kDa, mitochondrial OS=Homo sapiens GN=TRAP1 PE=1 SV=3	13500000	9540000	4880000	2.76639	1.95492	2.76639	0.441914	2
TRI25_HUMAN	3 (3)	120.67	0.000314	3.31	E3 ubiquitin/ISG15 ligase TRIM25 OS=Homo sapiens GN=TRIM25 PE=1 SV=2	12000000	9750000	3630000	3.30579	2.68595	3.30579	0.519275	3.50307
TRXR1_HUMAN	3 (3)	88.54	0.00267	6.4	Thioredoxin reductase 1, cytoplasmic OS=Homo sapiens GN=TXNRD1 PE=1 SV=3	2200000	3360000	524000	4.19847	6.41221	6.41221	0.807008	2.57349
TRYB1_HUMAN	4 (4)	153.4	7.48e-05	21.49	Tryptase alpha/beta-1 OS=Homo sapiens GN=TPSAB1 PE=1 SV=1	1700000	36500000	4390000	0.387244	8.31435	0.387244	-0.412016	4.1261
TRYD_HUMAN	1 (1)	47.15	6.6e-05	18.77	Tryptase delta OS=Homo sapiens GN=TPSD1 PE=2 SV=2	1290000	18100000	963000	1.33956	18.7954	18.7954	1.27405	4.18046
TS101_HUMAN	4 (3)	120.35	0.00181	2.24	Tumor susceptibility gene 101 protein OS=Homo sapiens GN=TSG101 PE=1 SV=2	4490000	7230000	3230000	1.39009	2.23839	2.23839	0.349936	2.74232
TSN8_HUMAN	1 (1)	33.24	0.000761	4.8	Tetraspanin-8 OS=Homo sapiens GN=TSPAN8 PE=1 SV=1	937000	4500000	1310000	0.715267	3.43511	3.43511	0.535941	3.11862
TSNAX_HUMAN	3 (3)	89.58	0.00243	1.83	Translin-associated protein X OS=Homo sapiens GN=TSNAX PE=1 SV=1	4520000	4040000	2480000	1.82258	1.62903	1.82258	0.260687	2.61439
TSP1_HUMAN	18 (15)	835.72	1.73e-07	12.87	Thrombospondin-1 OS=Homo sapiens GN=THBS1 PE=1 SV=2	266000000	79500000	20700000	12.8502	3.84058	12.8502	1.10891	6.76195
TSP2_HUMAN	20 (20)	933.42	3.8e-06	9.16	Thrombospondin-2 OS=Homo sapiens GN=THBS2 PE=1 SV=2	196000000	72300000	21400000	9.15888	3.3785	9.15888	0.961842	5.42022
TSTD1_HUMAN	1 (1)	39.24	0.00505	2.11	Thiosulfate sulfurtransferase/rhodanese-like domain-containing protein 1 OS=Homo sapiens GN=TSTD1 PE=1 SV=3	1890000	3990000	3520000	0.536932	1.13352	0.536932	-0.270081	2.29671
TSYL5_HUMAN	1 (1)	20.42	0.00174	3.28	Testis-specific Y-encoded-like protein 5 OS=Homo sapiens GN=TSPYL5 PE=1 SV=2	321000	410000	125000	2.568	3.28	3.28	0.515874	2.75945
TTC37_HUMAN	2 (1)	30.89	0.00055	2.49	Tetratricopeptide repeat protein 37 OS=Homo sapiens GN=TTC37 PE=1 SV=1	16500000	25400000	41000000	0.402439	0.619512	0.402439	-0.3953	3.25964
TTHY_HUMAN	2 (2)	117.8	4.83e-06	6.05	Transthyretin OS=Homo sapiens GN=TTR PE=1 SV=1	5460000	14900000	33100000	0.164955	0.450151	0.164955	-0.782635	5.31605
TWF1_HUMAN	4 (2)	191.25	3.58e-05	3.03	Twinfilin-1 OS=Homo sapiens GN=TWF1 PE=1 SV=3	4690000	3850000	1550000	3.02581	2.48387	3.02581	0.480841	4.44612
TXD17_HUMAN	3 (2)	102.94	0.000952	1.79	Thioredoxin domain-containing protein 17 OS=Homo sapiens GN=TXNDC17 PE=1 SV=1	6130000	8160000	4570000	1.34136	1.78556	1.78556	0.251774	3.02136
TXND5_HUMAN	10 (10)	278.85	1.74e-05	4.06	Thioredoxin domain-containing protein 5 OS=Homo sapiens GN=TXNDC5 PE=1 SV=2	36300000	63600000	15700000	2.3121	4.05096	4.05096	0.607557	4.75945
TYPH_HUMAN	9 (7)	317.37	0.00626	2.04	Thymidine phosphorylase OS=Homo sapiens GN=TYMP PE=1 SV=2	26700000	27200000	13300000	2.00752	2.04511	2.04511	0.310717	2.20343
U2AF2_HUMAN	2 (1)	92.05	5.38e-05	3.13	Splicing factor U2AF 65 kDa subunit OS=Homo sapiens GN=U2AF2 PE=1 SV=4	2040000	6400000	5280000	0.386364	1.21212	0.386364	-0.413004	4.26922
U520_HUMAN	14 (11)	320.26	0.000799	1.81	U5 small nuclear ribonucleoprotein 200 kDa helicase OS=Homo sapiens GN=SNRNP200 PE=1 SV=2	12100000	11600000	6670000	1.81409	1.73913	1.81409	0.25866	3.09745
U5S1_HUMAN	10 (8)	361.87	7.76e-05	2.33	116 kDa U5 small nuclear ribonucleoprotein component OS=Homo sapiens GN=EFTUD2 PE=1 SV=1	15000000	16200000	6940000	2.16138	2.33429	2.33429	0.368156	4.11014
UBA1_HUMAN	33 (29)	1501.55	1.5e-06	3.37	Ubiquitin-like modifier-activating enzyme 1 OS=Homo sapiens GN=UBA1 PE=1 SV=3	276000000	254000000	82100000	3.36175	3.09379	3.36175	0.526566	5.82391
UBA3_HUMAN	1 (1)	25.82	0.00851	24.39	NEDD8-activating enzyme E1 catalytic subunit OS=Homo sapiens GN=UBA3 PE=1 SV=2	1620000	4750000	195000	8.30769	24.359	24.359	1.38666	2.07007
UBC9_HUMAN	2 (1)	72.35	0.00136	2.02	SUMO-conjugating enzyme UBC9 OS=Homo sapiens GN=UBE2I PE=1 SV=1	9030000	18300000	11400000	0.792105	1.60526	1.60526	0.205546	2.86646
UBCP1_HUMAN	1 (1)	23.59	0.000671	1.62	Ubiquitin-like domain-containing CTD phosphatase 1 OS=Homo sapiens GN=UBLCP1 PE=1 SV=2	1780000	2150000	2870000	0.620209	0.749129	0.620209	-0.207462	3.17328
UBE2K_HUMAN	1 (1)	34.82	0.0064	4.74	Ubiquitin-conjugating enzyme E2 K OS=Homo sapiens GN=UBE2K PE=1 SV=3	2580000	4580000	965000	2.67358	4.74611	4.74611	0.676338	2.19382
UBE2N_HUMAN	6 (4)	231.14	0.00429	1.78	Ubiquitin-conjugating enzyme E2 N OS=Homo sapiens GN=UBE2N PE=1 SV=1	18100000	32400000	20400000	0.887255	1.58824	1.58824	0.200915	2.36754
UBFD1_HUMAN	1 (1)	16.56	0.0021	10.05	Ubiquitin domain-containing protein UBFD1 OS=Homo sapiens GN=UBFD1 PE=1 SV=2	2860000	3380000	336000	8.5119	10.0595	10.0595	1.00258	2.67778
UBP14_HUMAN	9 (8)	290.44	0.01	7.26	Ubiquitin carboxyl-terminal hydrolase 14 OS=Homo sapiens GN=USP14 PE=1 SV=3	5630000	21500000	2960000	1.90203	7.26351	7.26351	0.861147	2
UBP28_HUMAN	3 (2)	41.57	7.04e-05	76.67	Ubiquitin carboxyl-terminal hydrolase 28 OS=Homo sapiens GN=USP28 PE=1 SV=1	908000	35800000	467000	1.94433	76.6595	76.6595	1.88457	4.15243
UBP5_HUMAN	4 (4)	215.17	0.000432	3.37	Ubiquitin carboxyl-terminal hydrolase 5 OS=Homo sapiens GN=USP5 PE=1 SV=2	11000000	7140000	3260000	3.37423	2.19018	3.37423	0.528175	3.36452
UBP7_HUMAN	3 (3)	61.63	0.00449	2.43	Ubiquitin carboxyl-terminal hydrolase 7 OS=Homo sapiens GN=USP7 PE=1 SV=2	3990000	8660000	3570000	1.11765	2.42577	2.42577	0.38485	2.34775
UBQL4_HUMAN	1 (1)	57.28	0.00957	471.74	Ubiquilin-4 OS=Homo sapiens GN=UBQLN4 PE=1 SV=2	2280000	830000	4826.67	472.375	171.961	472.375	2.67429	2.01909
UBR4_HUMAN	2 (2)	46.47	0.00106	18.97	E3 ubiquitin-protein ligase UBR4 OS=Homo sapiens GN=UBR4 PE=1 SV=1	661000	468000	34800	18.9943	13.4483	18.9943	1.27862	2.97469
UFC1_HUMAN	1 (1)	20.83	9.52e-06	2.05	Ubiquitin-fold modifier-conjugating enzyme 1 OS=Homo sapiens GN=UFC1 PE=1 SV=3	1920000	2100000	3950000	0.486076	0.531646	0.486076	-0.313296	5.02136
UGDH_HUMAN	9 (8)	321.78	0.000408	2.49	UDP-glucose 6-dehydrogenase OS=Homo sapiens GN=UGDH PE=1 SV=1	15000000	26200000	10500000	1.42857	2.49524	2.49524	0.397112	3.38934
UN45A_HUMAN	2 (2)	51.87	0.000243	2.11	Protein unc-45 homolog A OS=Homo sapiens GN=UNC45A PE=1 SV=1	8130000	4490000	3860000	2.10622	1.16321	2.10622	0.323503	3.61439
URP2_HUMAN	1 (1)	39.91	0.00024	5.84	Fermitin family homolog 3 OS=Homo sapiens GN=FERMT3 PE=1 SV=1	952000	2470000	423000	2.25059	5.83924	5.83924	0.766357	3.61979
USMG5_HUMAN	2 (1)	120.26	7.57e-06	8.01	Up-regulated during skeletal muscle growth protein 5 OS=Homo sapiens GN=USMG5 PE=1 SV=1	6760000	7420000	926000	7.30022	8.01296	8.01296	0.903793	5.1209
USO1_HUMAN	10 (8)	395.8	0.000181	2.48	General vesicular transport factor p115 OS=Homo sapiens GN=USO1 PE=1 SV=2	18100000	15400000	7280000	2.48626	2.11538	2.48626	0.395547	3.74232
USP9X_HUMAN	2 (2)	46.11	0.02	2.34	Probable ubiquitin carboxyl-terminal hydrolase FAF-X OS=Homo sapiens GN=USP9X PE=1 SV=3	1220000	897000	520000	2.34615	1.725	2.34615	0.370356	1.69897
VAMP8_HUMAN	1 (1)	16.36	0.00702	1.89	Vesicle-associated membrane protein 8 OS=Homo sapiens GN=VAMP8 PE=1 SV=1	3390000	2640000	1790000	1.89385	1.47486	1.89385	0.277347	2.15366
VAPA_HUMAN	3 (2)	67.52	0.000855	2.14	Vesicle-associated membrane protein-associated protein A OS=Homo sapiens GN=VAPA PE=1 SV=3	4880000	10400000	8950000	0.545251	1.16201	0.545251	-0.263403	3.06803
VASP_HUMAN	3 (3)	82.89	0.00431	6.3	Vasodilator-stimulated phosphoprotein OS=Homo sapiens GN=VASP PE=1 SV=3	1460000	3050000	484000	3.01653	6.30165	6.30165	0.799454	2.36552
VAT1_HUMAN	7 (7)	315.54	3.32e-07	10.73	Synaptic vesicle membrane protein VAT-1 homolog OS=Homo sapiens GN=VAT1 PE=1 SV=2	10200000	23100000	2150000	4.74419	10.7442	10.7442	1.03117	6.47886
VATA_HUMAN	4 (4)	138.95	7.61e-05	3.42	V-type proton ATPase catalytic subunit A OS=Homo sapiens GN=ATP6V1A PE=1 SV=2	5370000	13000000	3800000	1.41316	3.42105	3.42105	0.53416	4.11862
VATB2_HUMAN	3 (3)	112.71	2.3e-05	3.42	V-type proton ATPase subunit B, brain isoform OS=Homo sapiens GN=ATP6V1B2 PE=1 SV=3	4930000	4960000	1450000	3.4	3.42069	3.42069	0.534114	4.63827
VDAC1_HUMAN	13 (12)	691.88	4.78e-07	2.68	Voltage-dependent anion-selective channel protein 1 OS=Homo sapiens GN=VDAC1 PE=1 SV=2	98800000	108000000	40500000	2.43951	2.66667	2.66667	0.425969	6.32057
VDAC3_HUMAN	6 (5)	207.31	0.000153	3.56	Voltage-dependent anion-selective channel protein 3 OS=Homo sapiens GN=VDAC3 PE=1 SV=1	12200000	20300000	5690000	2.14411	3.56766	3.56766	0.552384	3.81531
VILI_HUMAN	2 (2)	75.49	0.00142	4.37	Villin-1 OS=Homo sapiens GN=VIL1 PE=1 SV=4	263000	1150000	456000	0.576754	2.52193	0.576754	-0.239009	2.84771
VIME_HUMAN	37 (25)	1975.76	5.53e-06	3.01	Vimentin OS=Homo sapiens GN=VIM PE=1 SV=4	566000000	718000000	238000000	2.37815	3.01681	3.01681	0.479547	5.25727
VINC_HUMAN	40 (33)	1845.02	4.14e-06	2.48	Vinculin OS=Homo sapiens GN=VCL PE=1 SV=4	136000000	328000000	132000000	1.0303	2.48485	2.48485	0.3953	5.383
VP26A_HUMAN	3 (2)	76.38	0.000155	8.59	Vacuolar protein sorting-associated protein 26A OS=Homo sapiens GN=VPS26A PE=1 SV=2	3260000	9590000	1120000	2.91071	8.5625	8.5625	0.932601	3.80967
VPS28_HUMAN	1 (1)	21.38	3.76e-06	19.53	Vacuolar protein sorting-associated protein 28 homolog OS=Homo sapiens GN=VPS28 PE=1 SV=1	5090000	99400000	20400000	0.24951	4.87255	0.24951	-0.602912	5.42481
VPS35_HUMAN	4 (4)	158.69	0.00635	2.08	Vacuolar protein sorting-associated protein 35 OS=Homo sapiens GN=VPS35 PE=1 SV=2	7090000	8970000	4310000	1.64501	2.08121	2.08121	0.318315	2.19723
VTDB_HUMAN	13 (11)	619.33	0.000249	2.98	Vitamin D-binding protein OS=Homo sapiens GN=GC PE=1 SV=1	67200000	50900000	22600000	2.97345	2.25221	2.97345	0.473261	3.6038
VTNC_HUMAN	5 (5)	235.64	0.000557	2.65	Vitronectin OS=Homo sapiens GN=VTN PE=1 SV=1	64400000	24300000	25000000	2.576	0.972	2.576	0.410946	3.25414
WFKN2_HUMAN	1 (1)	19.17	5.27e-07	19.87	WAP, Kazal, immunoglobulin, Kunitz and NTR domain-containing protein 2 OS=Homo sapiens GN=WFIKKN2 PE=1 SV=1	2470000	521000	10300000	0.239806	0.0505825	0.0505825	-1.296	6.27819
XPO1_HUMAN	8 (8)	242.63	0.00072	3.81	Exportin-1 OS=Homo sapiens GN=XPO1 PE=1 SV=1	11600000	7540000	3050000	3.80328	2.47213	3.80328	0.580158	3.14267
XPO2_HUMAN	16 (13)	551.15	0.000113	1.71	Exportin-2 OS=Homo sapiens GN=CSE1L PE=1 SV=3	39700000	37500000	23200000	1.71121	1.61638	1.71121	0.233303	3.94692
XRCC5_HUMAN	15 (14)	607.74	0.000266	1.78	X-ray repair cross-complementing protein 5 OS=Homo sapiens GN=XRCC5 PE=1 SV=3	26000000	46300000	45000000	0.577778	1.02889	0.577778	-0.238239	3.57512
XRCC6_HUMAN	14 (13)	624.64	0.000161	2.1	X-ray repair cross-complementing protein 6 OS=Homo sapiens GN=XRCC6 PE=1 SV=2	39900000	83800000	65800000	0.606383	1.27356	0.606383	-0.217253	3.79317
YBOX1_HUMAN	9 (7)	394.75	0.01	4.6	Nuclease-sensitive element-binding protein 1 OS=Homo sapiens GN=YBX1 PE=1 SV=3	22300000	13900000	4850000	4.59794	2.86598	4.59794	0.662563	2
ZFP28_HUMAN	1 (1)	14.53	7.82e-06	4.96	Zinc finger protein 28 homolog OS=Homo sapiens GN=ZFP28 PE=1 SV=1	397000	961000	1970000	0.201523	0.487817	0.201523	-0.695676	5.10679
ZN207_HUMAN	1 (1)	16.25	0.00502	2.98	BUB3-interacting and GLEBS motif-containing protein ZNF207 OS=Homo sapiens GN=ZNF207 PE=1 SV=1	1280000	2370000	798000	1.60401	2.96992	2.96992	0.472745	2.2993
ZN428_HUMAN	1 (1)	13.96	0.00574	5.39	Zinc finger protein 428 OS=Homo sapiens GN=ZNF428 PE=1 SV=2	908000	168000	170000	5.34118	0.988235	5.34118	0.727637	2.24109
ZN713_HUMAN	1 (1)	17.34	0.00741	25.22	Zinc finger protein 713 OS=Homo sapiens GN=ZNF713 PE=2 SV=1	1870000	2710000	107000	17.4766	25.3271	25.3271	1.40359	2.13018
ZRAB2_HUMAN	2 (2)	44.85	0.02	3.45	Zinc finger Ran-binding domain-containing protein 2 OS=Homo sapiens GN=ZRANB2 PE=1 SV=2	1280000	457000	1580000	0.810127	0.289241	0.289241	-0.538741	1.69897
ZYX_HUMAN	5 (5)	198.81	4.75e-07	7.41	Zyxin OS=Homo sapiens GN=ZYX PE=1 SV=1	20000000	15200000	2710000	7.38007	5.60886	7.38007	0.868061	6.32331
